# Supplementary material for: Wigwams: identifying gene modules co-regulated across multiple biological conditions
Source: PubMed Central journal article supplement (PMC3967106; doi:10.1093/bioinformatics/btt728), 2013-12-18

### **Supplementary Data Set 3:**

The expression profiles of genes in each of the final 78 modules identified by Wigwams. The time series data sets spanned by each module are highlighted in blue and included in the module identifier, with 1 to 6 corresponding to *B. cinerea* infection, senescence, root response to cold, root response to drought, shoot response to cold and shoot response to UV light respectively.

## Module1 – 1,2,6

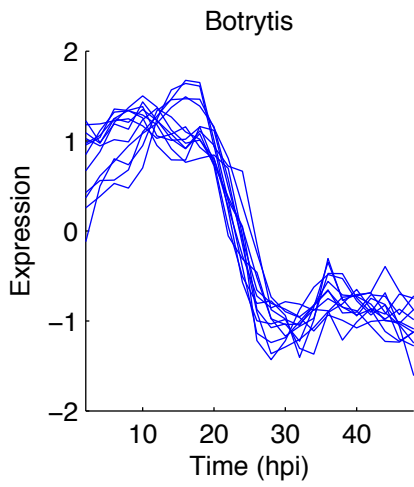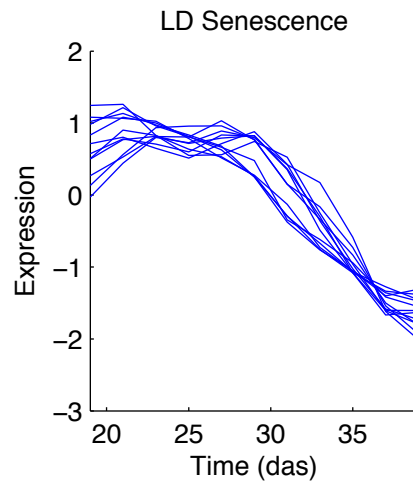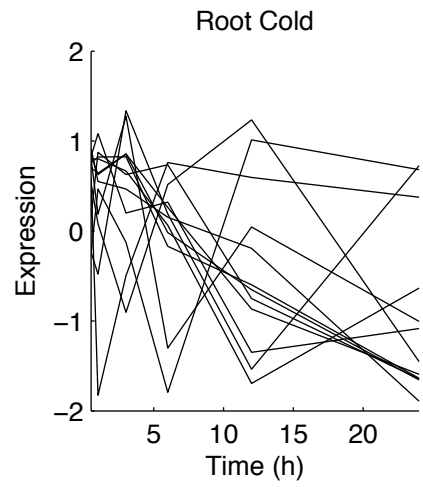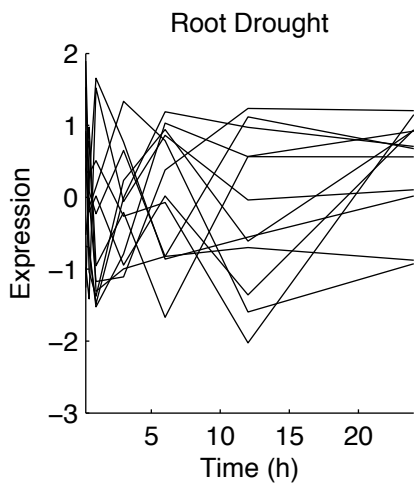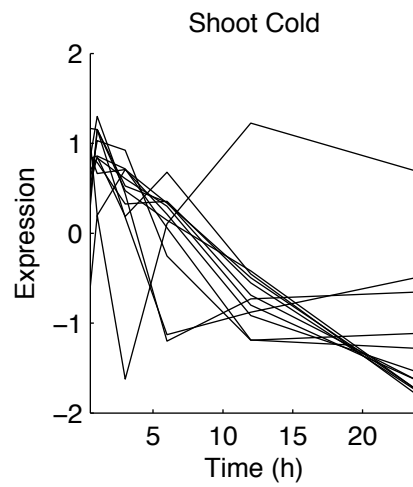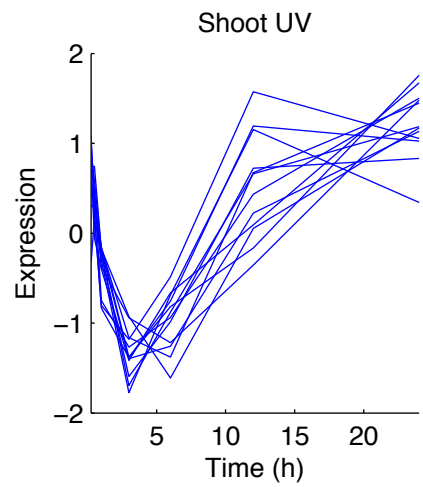

## Module2 – 3,5,6

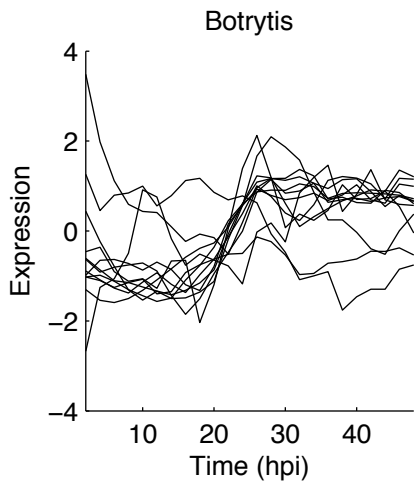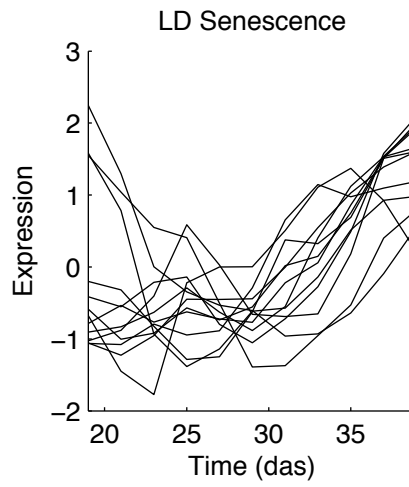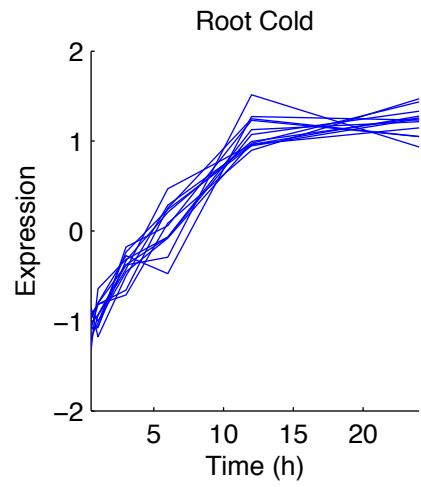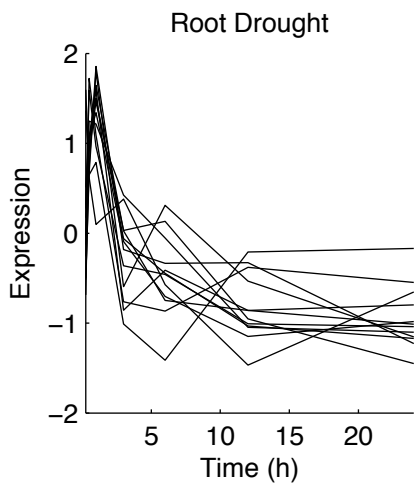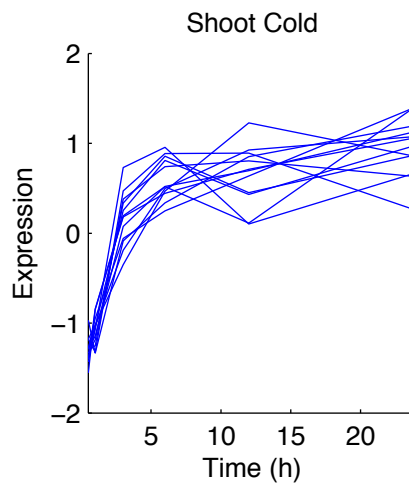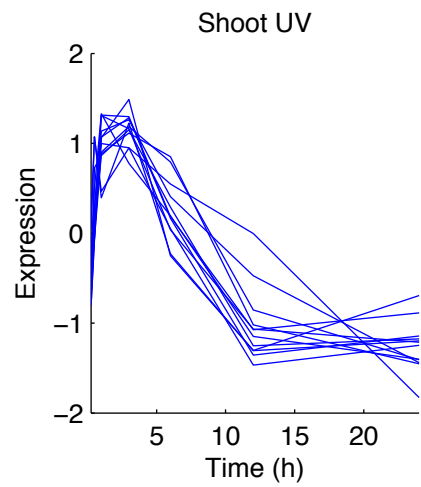

### Module3 – 5,6

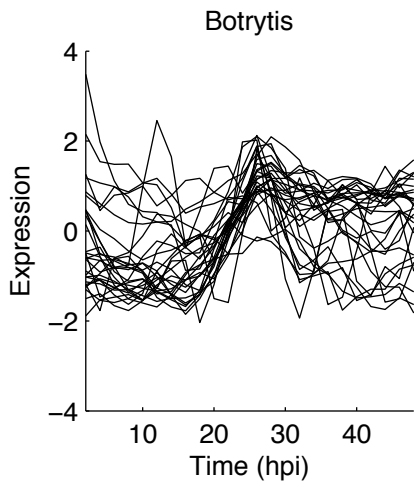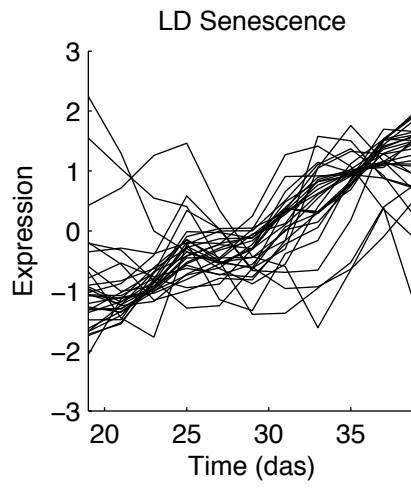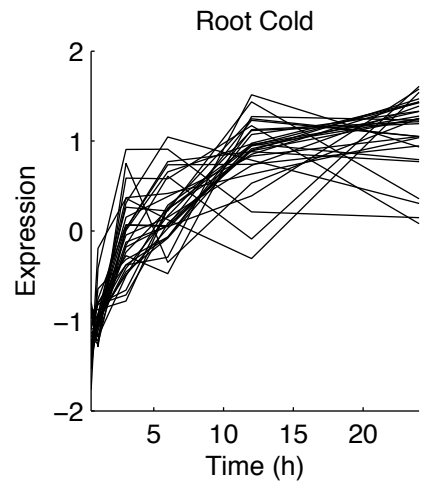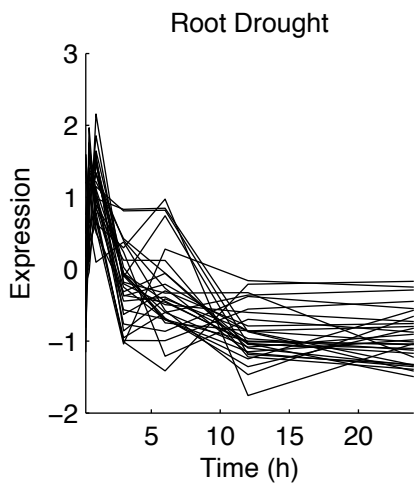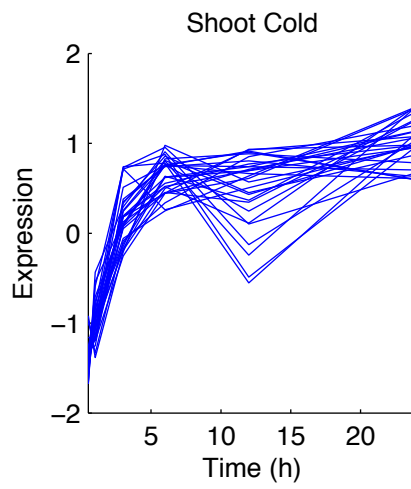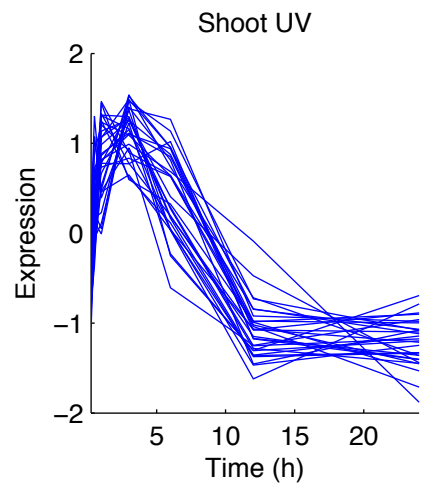

## Module4 – 3,6

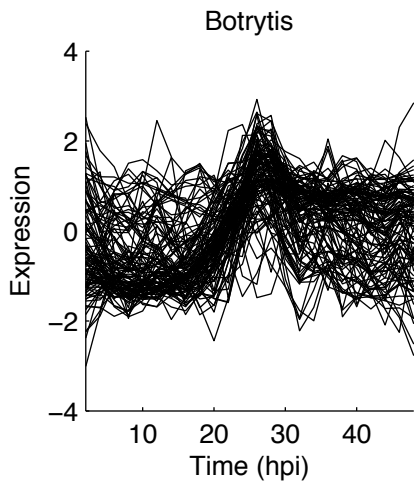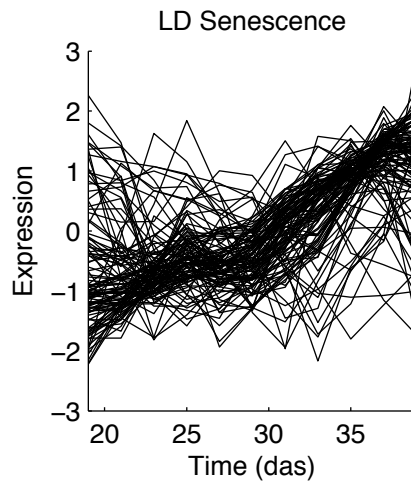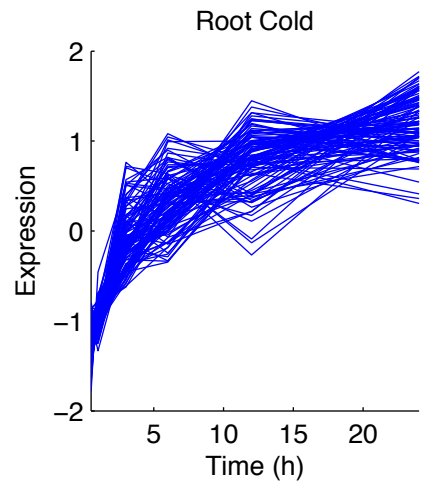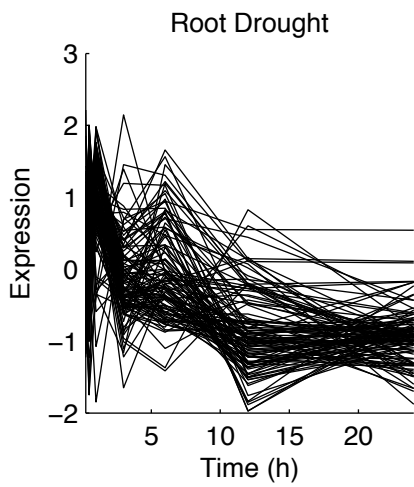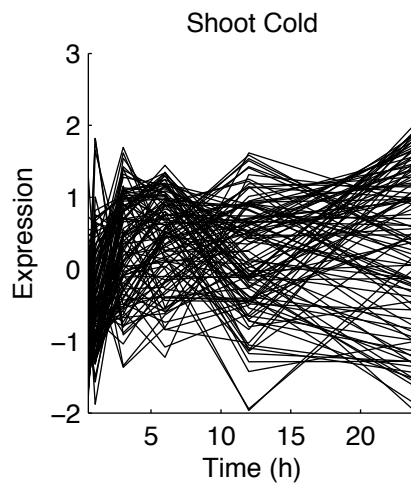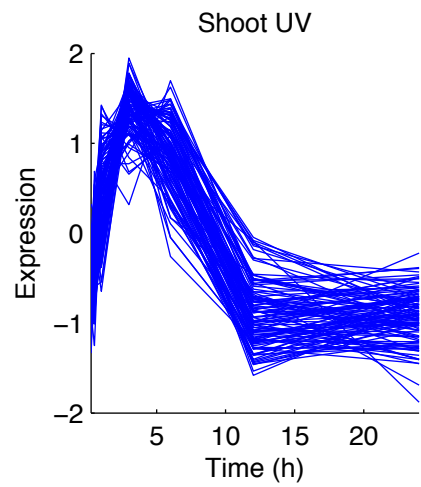

## Module5 – 2,3,5

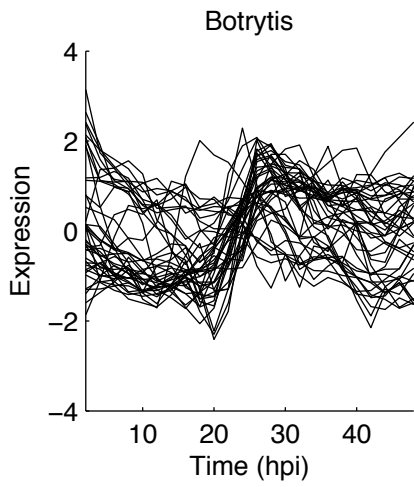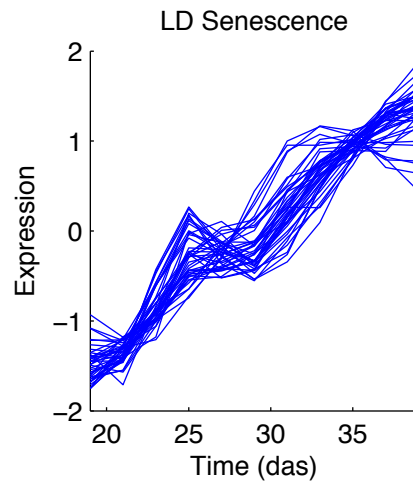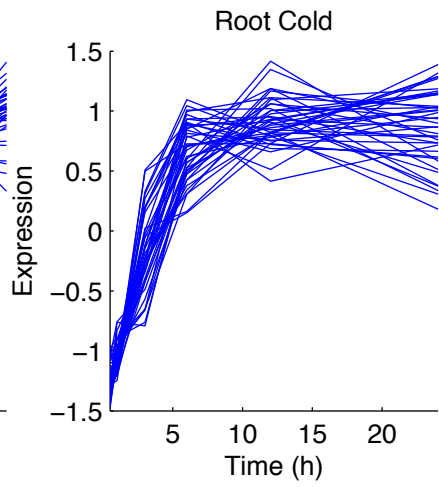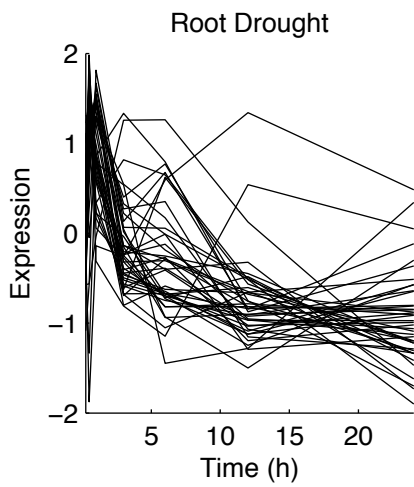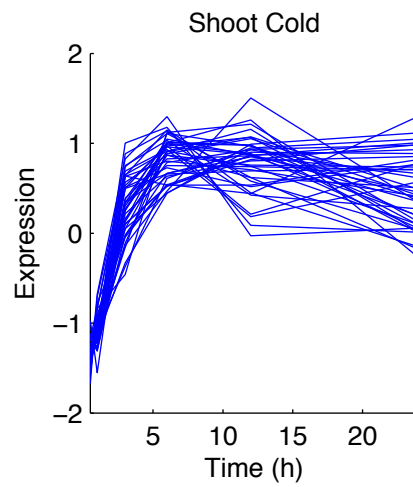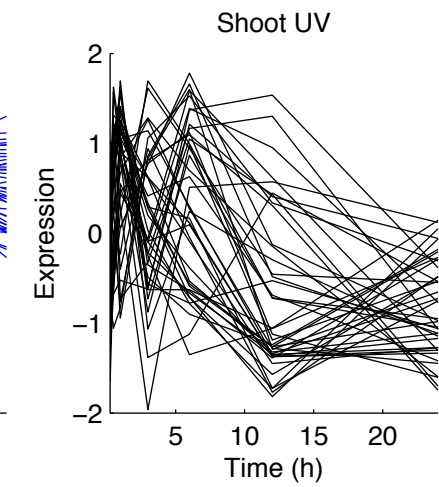

## Module6 – 1,6

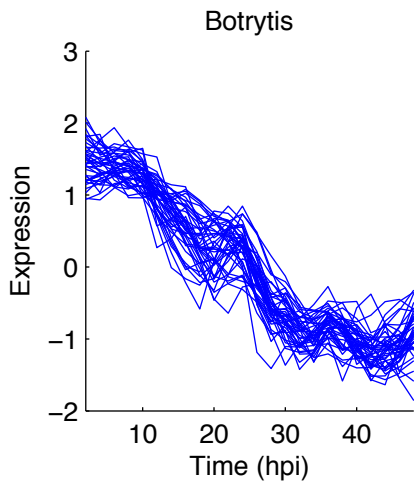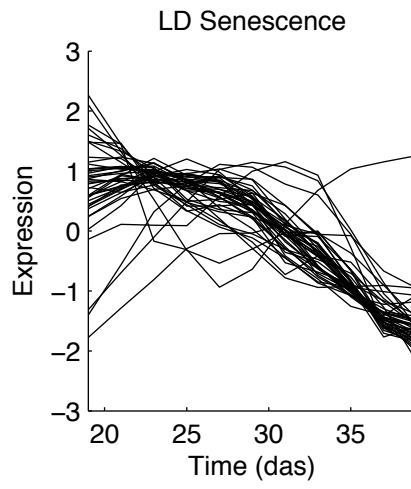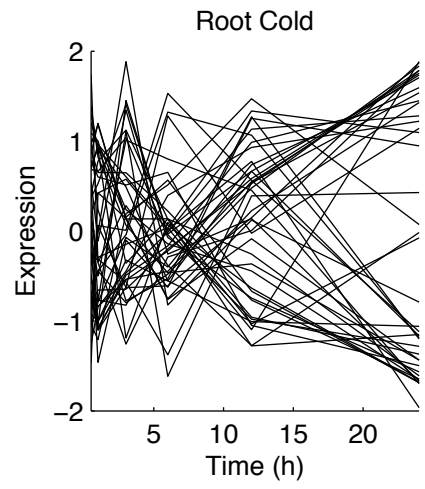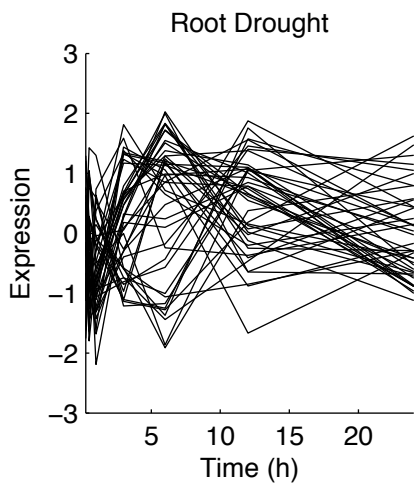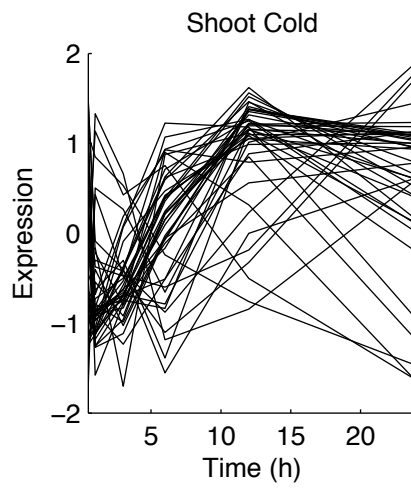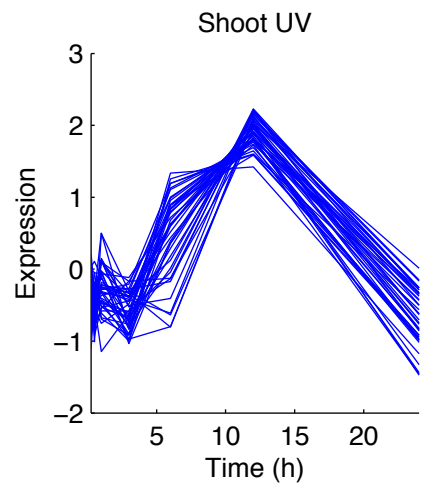

## Module7 – 1,3,4,6

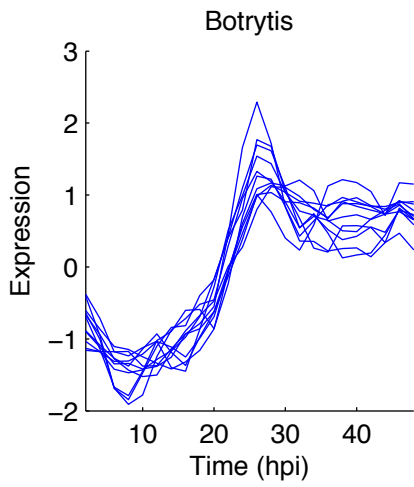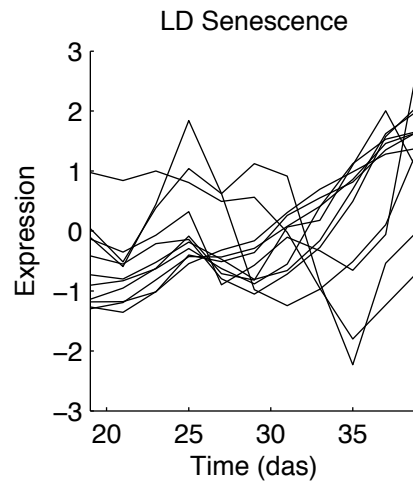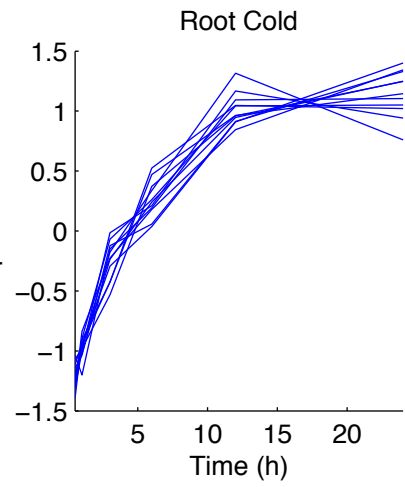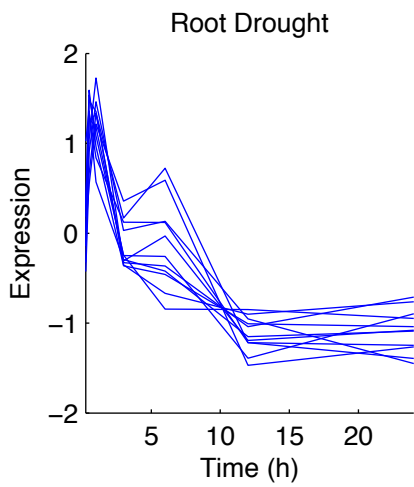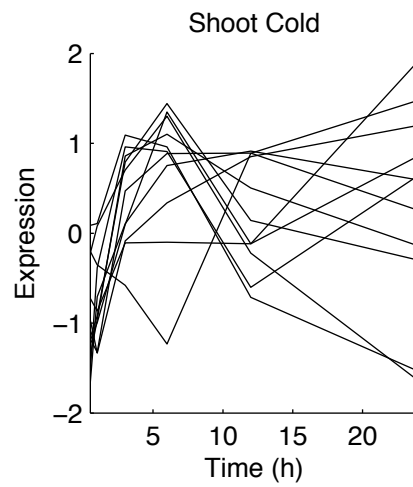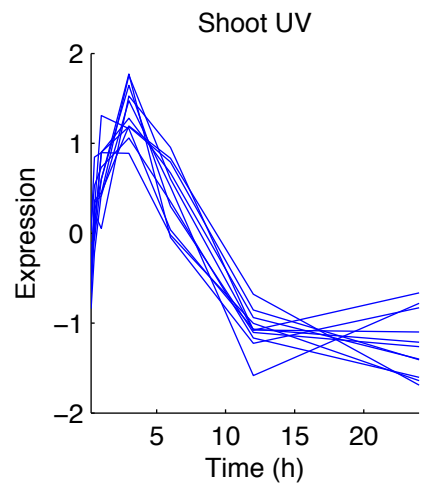



## Module8 – 3,4,6

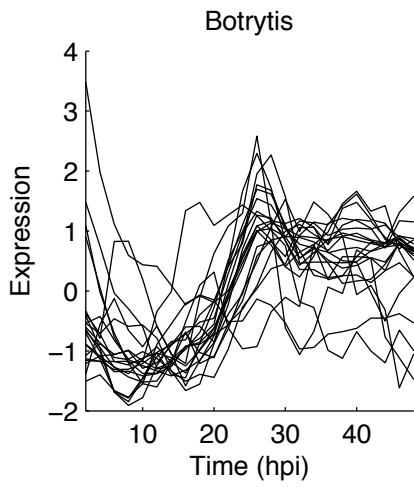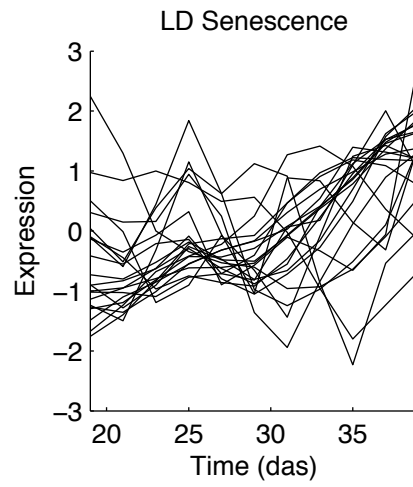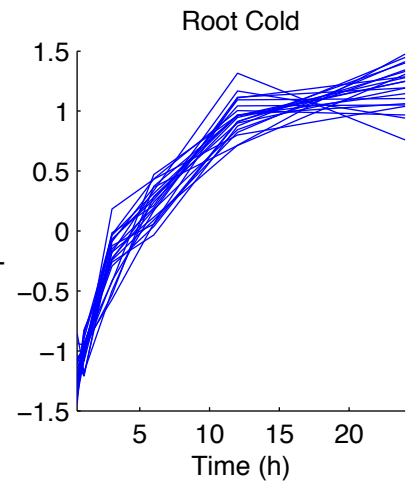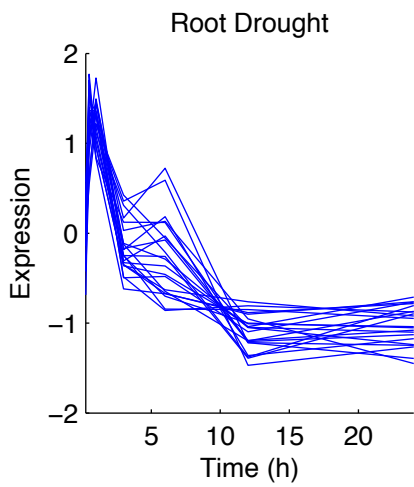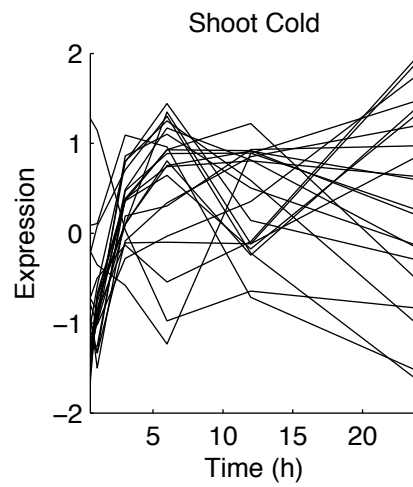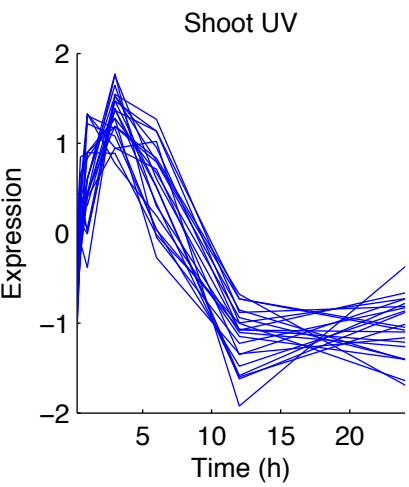

## Module9 – 1,3,5

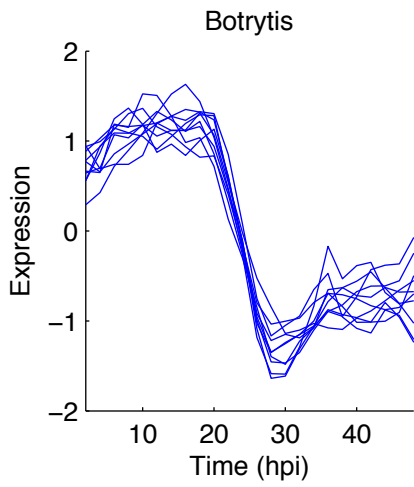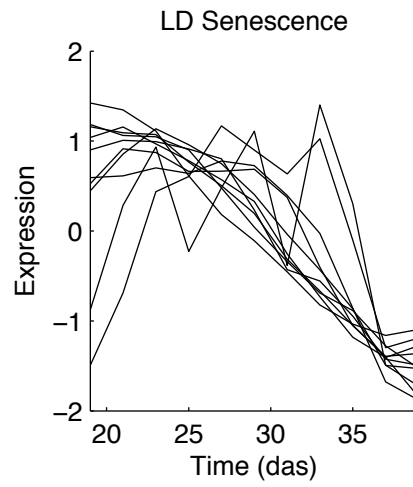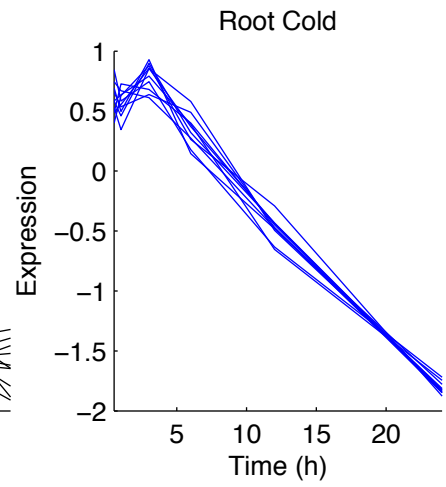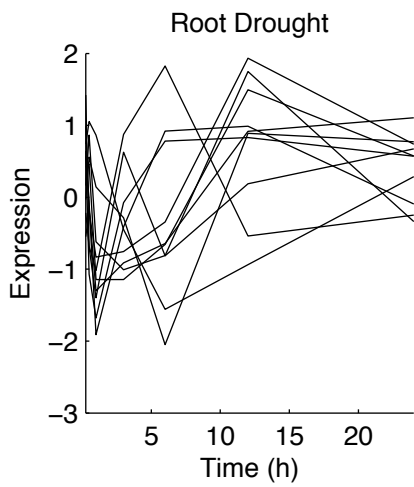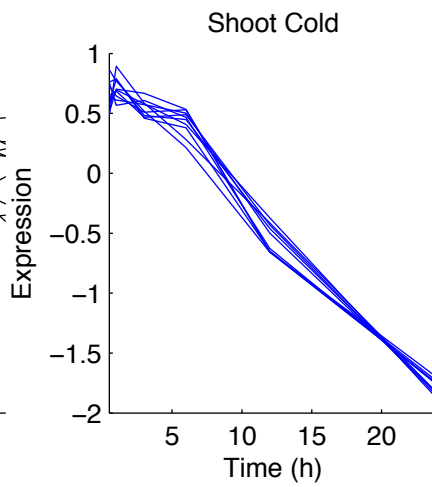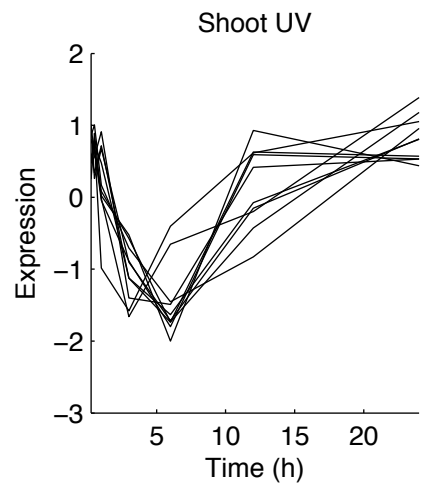

## Module10 – 3,5,6

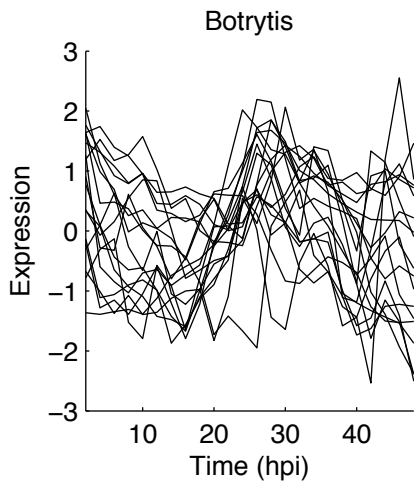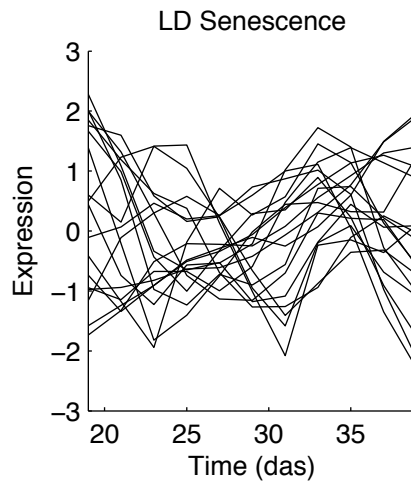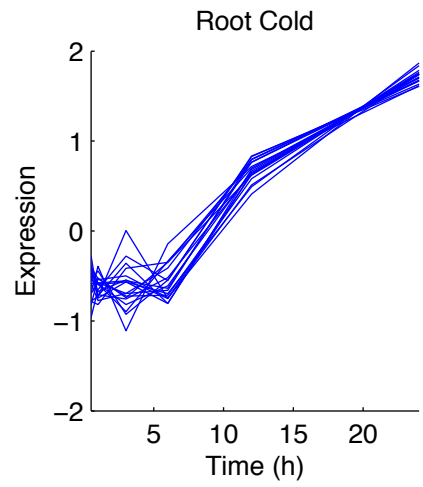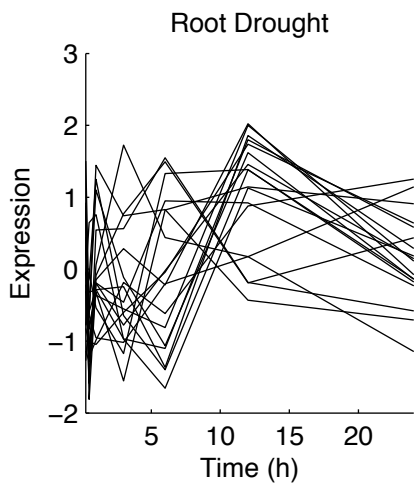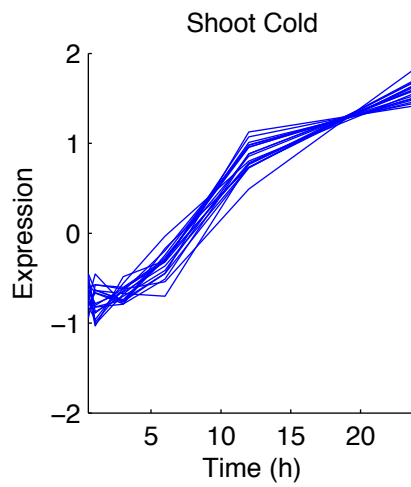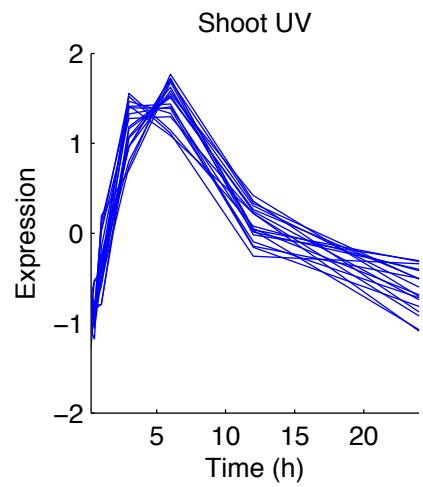

## Module11 – 2,3,5,6

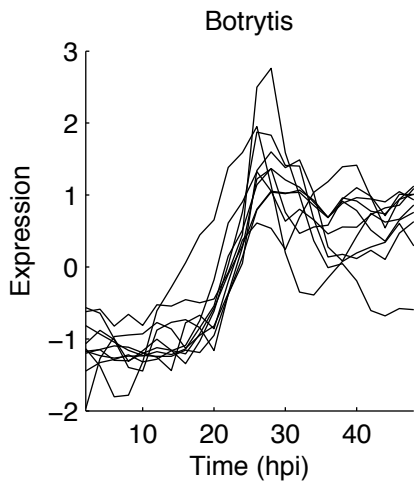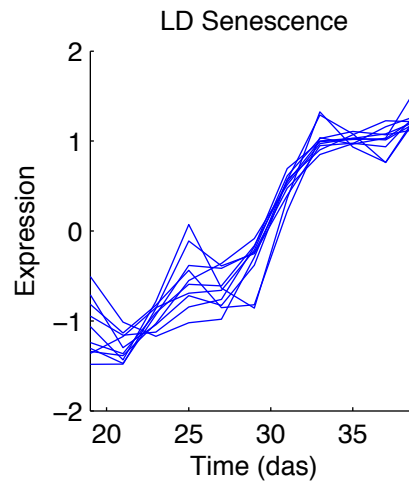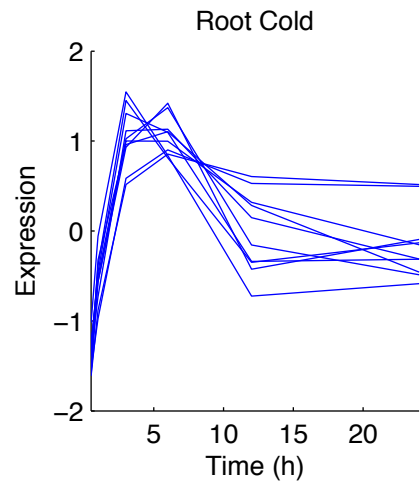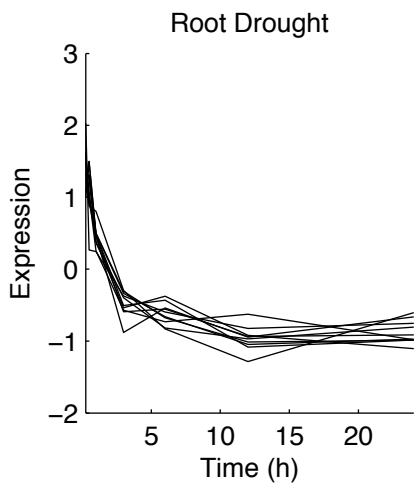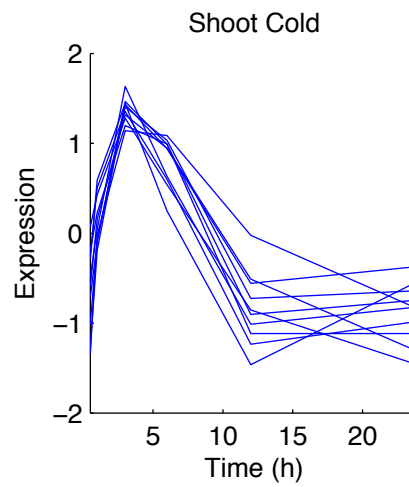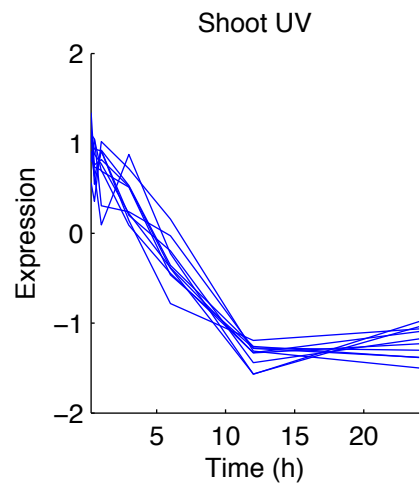

## Module12 – 1,2,6

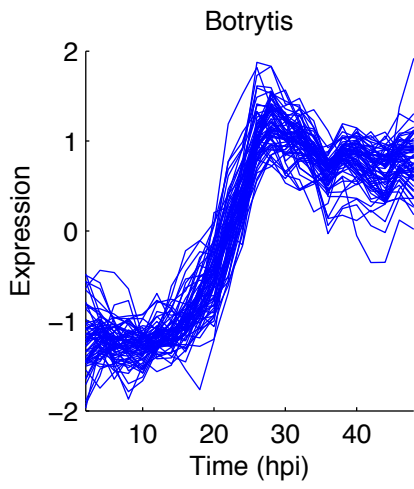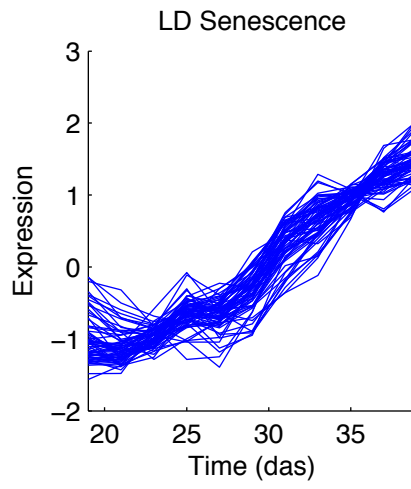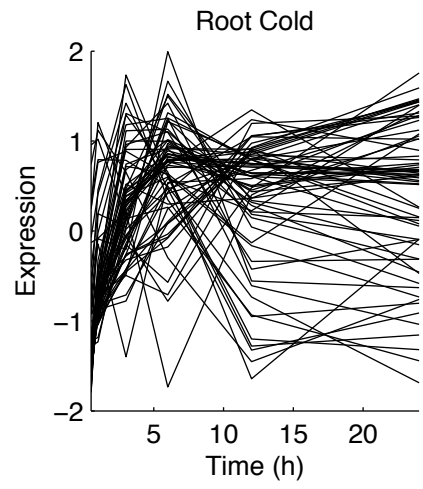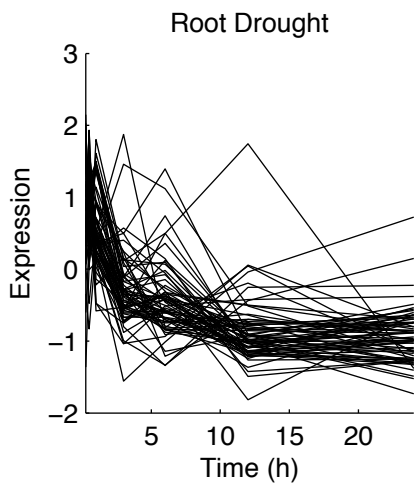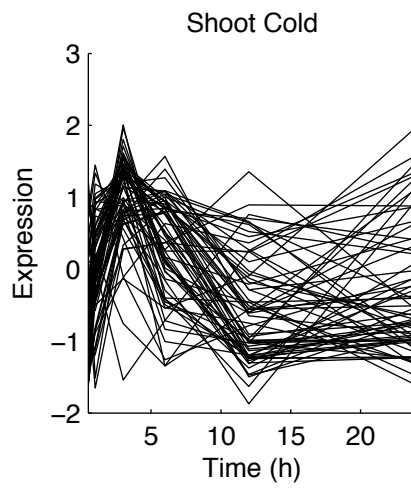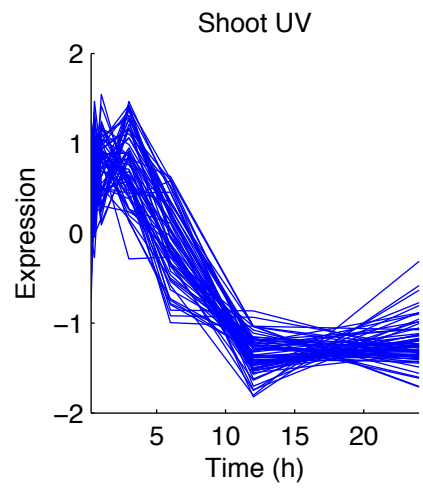

## Module13 – 5,6

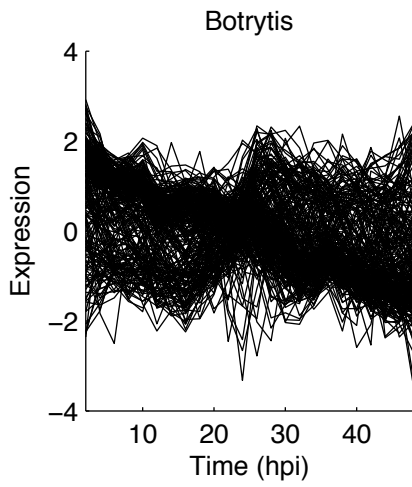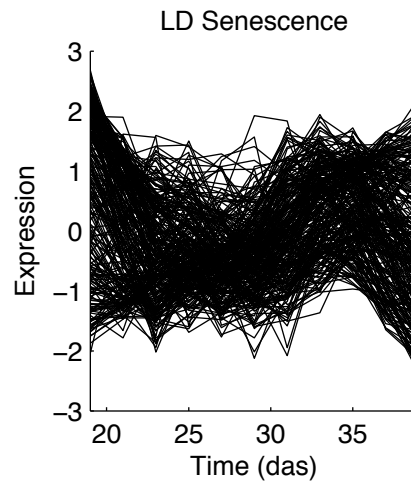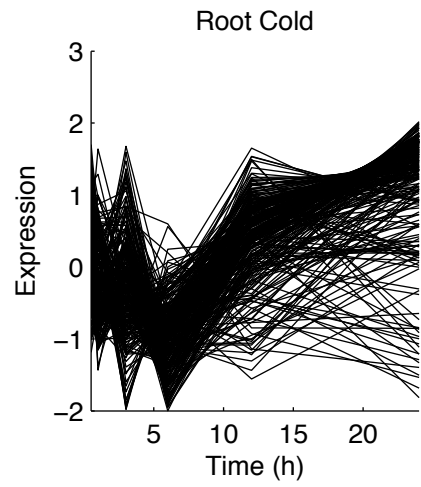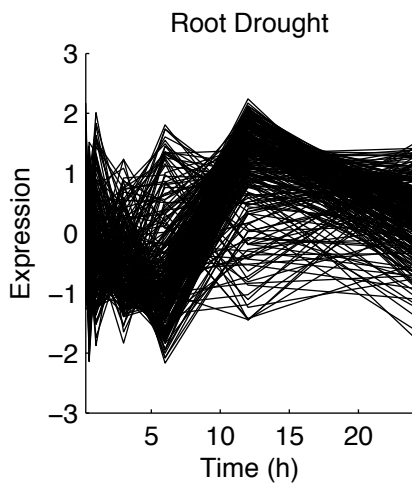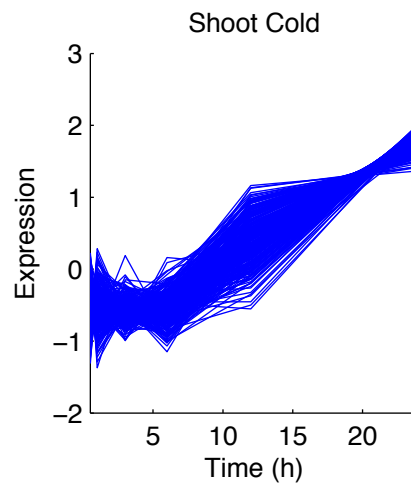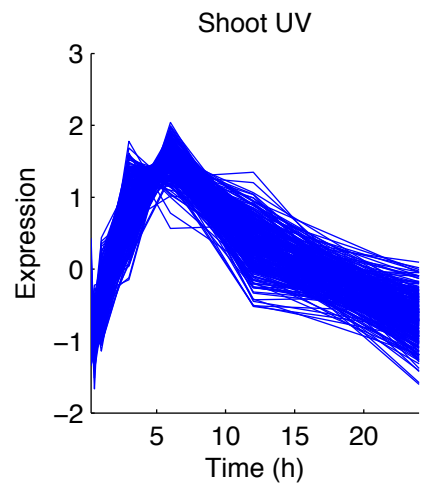

## Module14 – 1,2,3

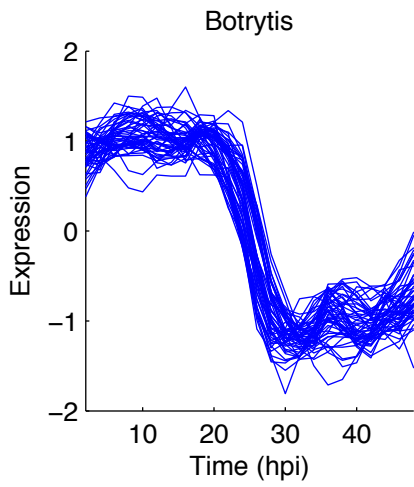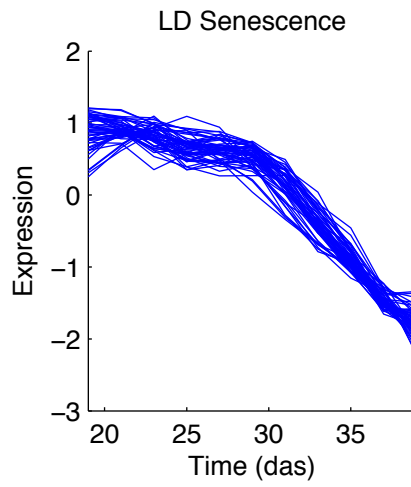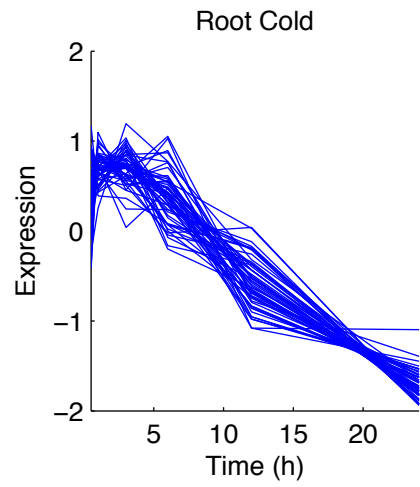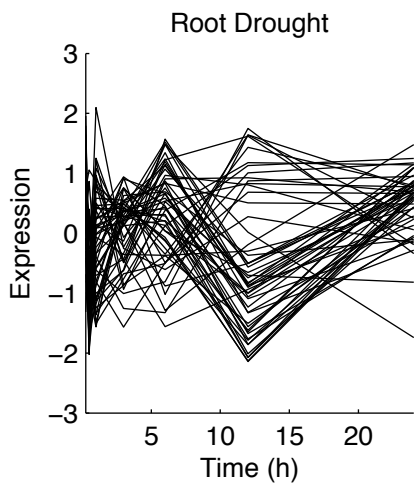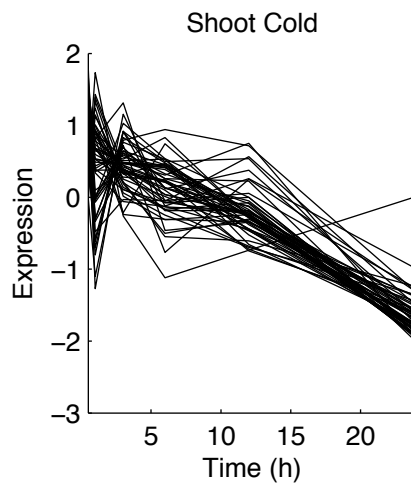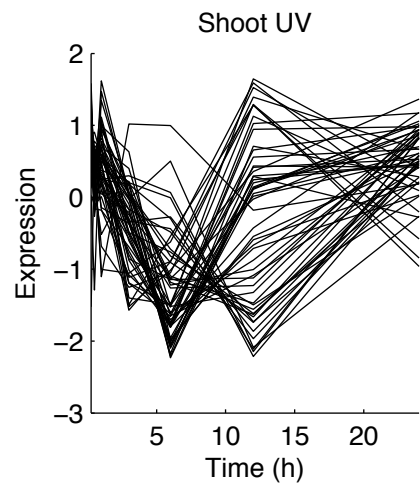

### Module15 – 1,2,3,4,6

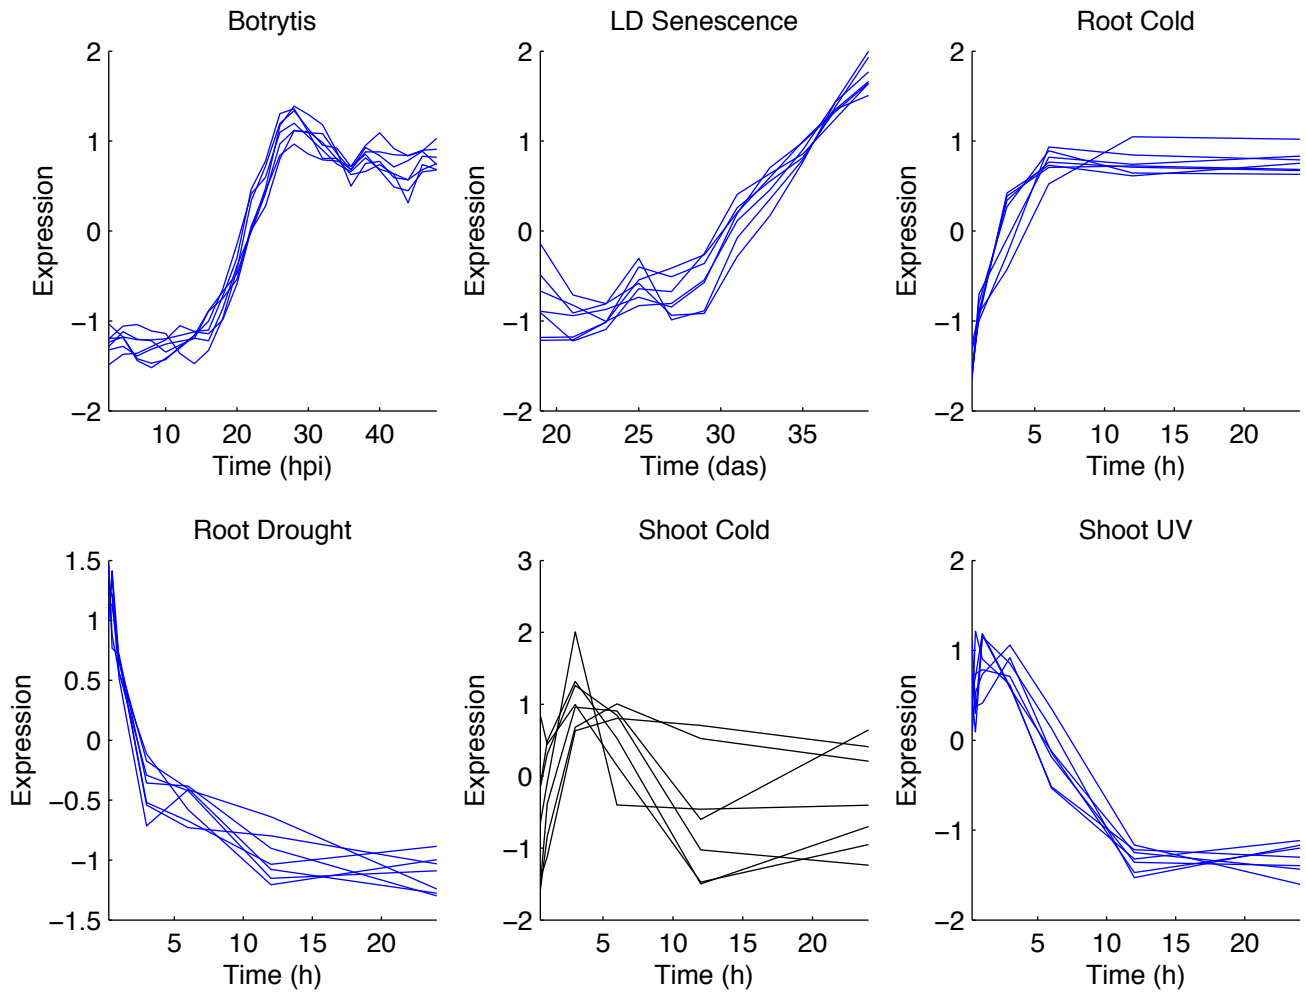



## Module16 – 1,2,4,6

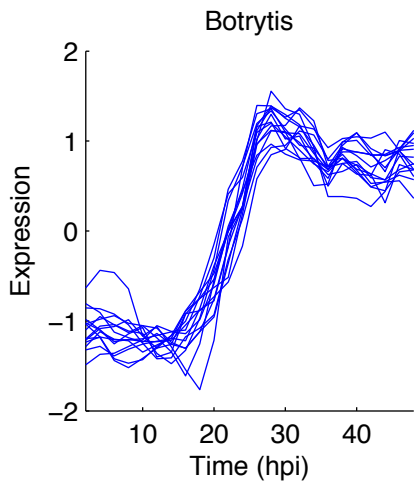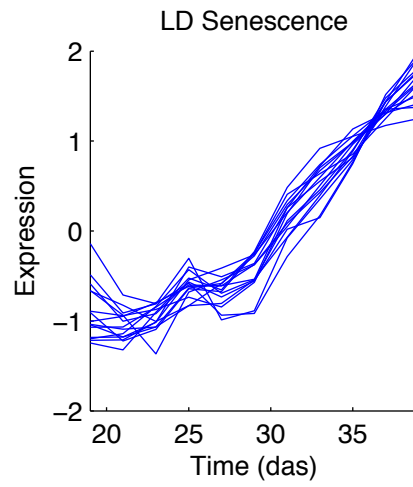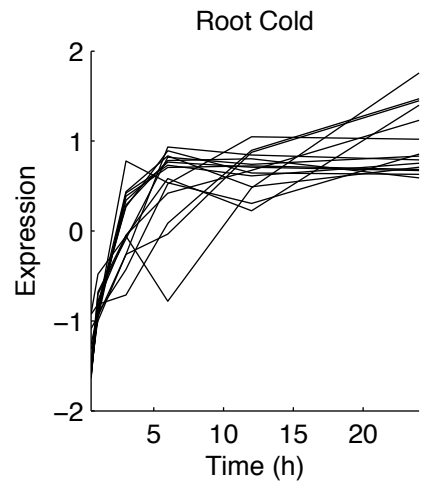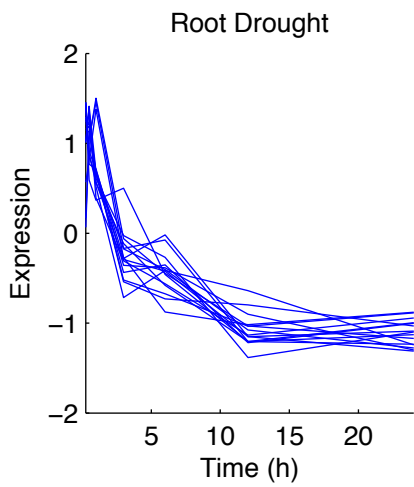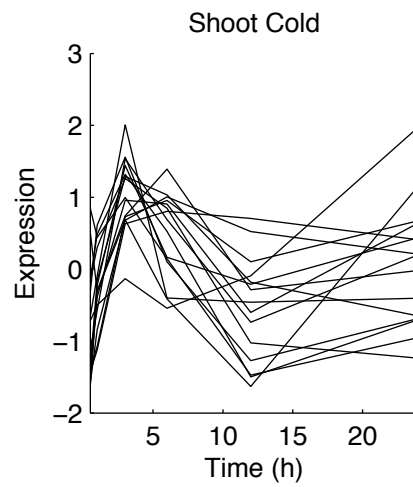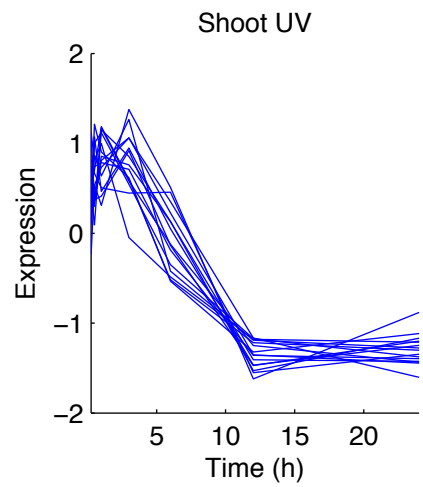

## Module17 – 1,3,6

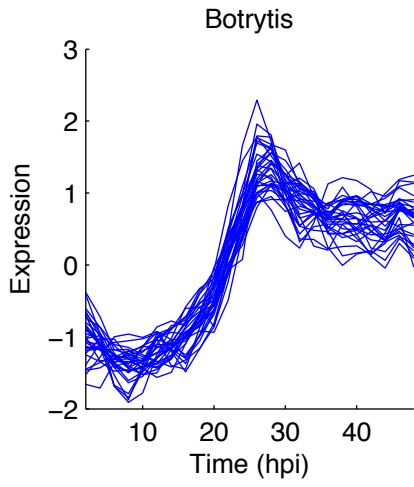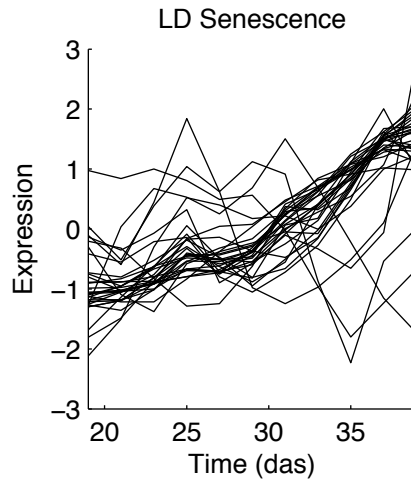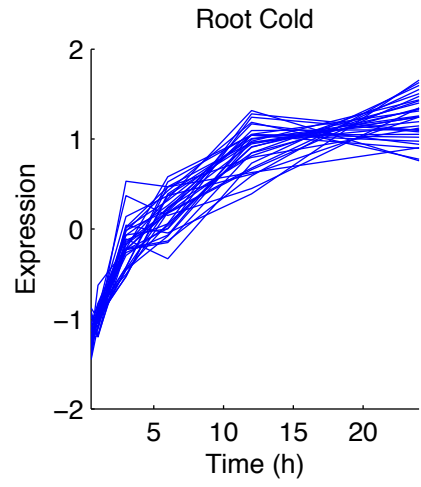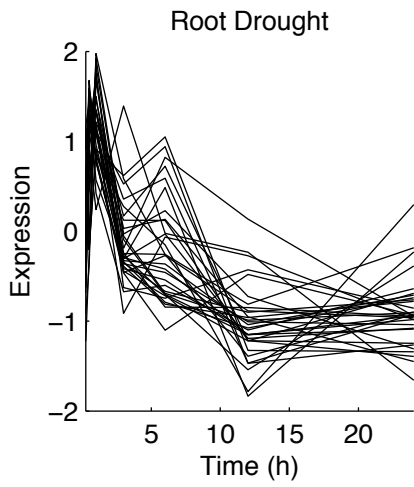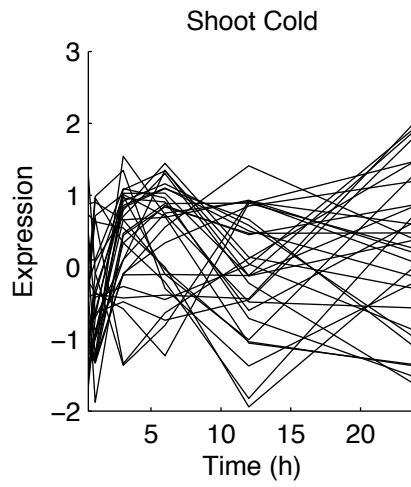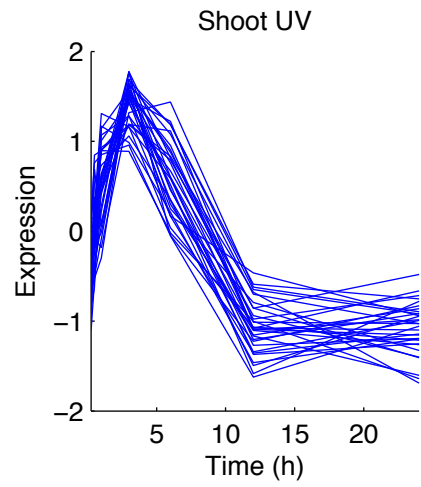

## Module18 – 1,5

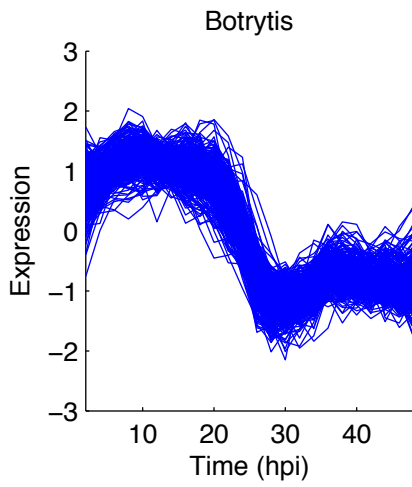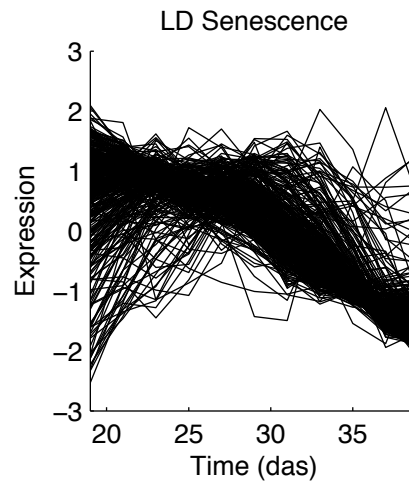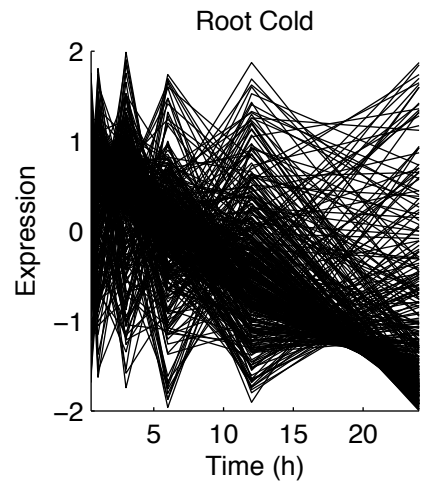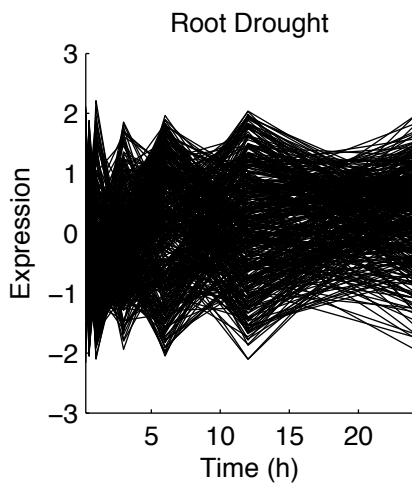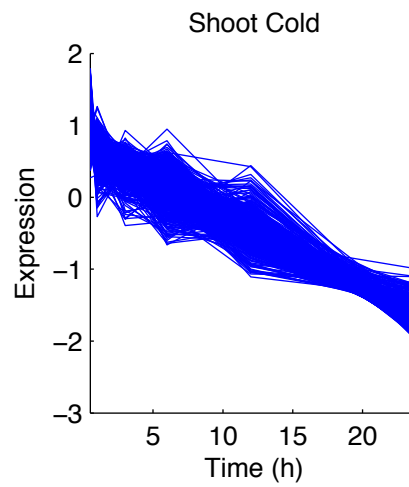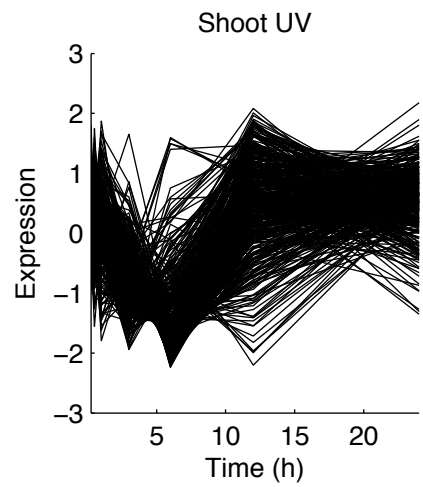

## Module19 – 3,5

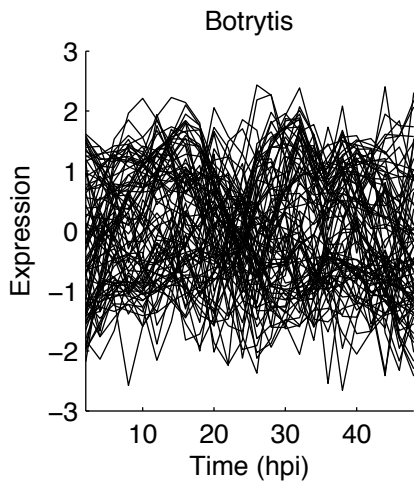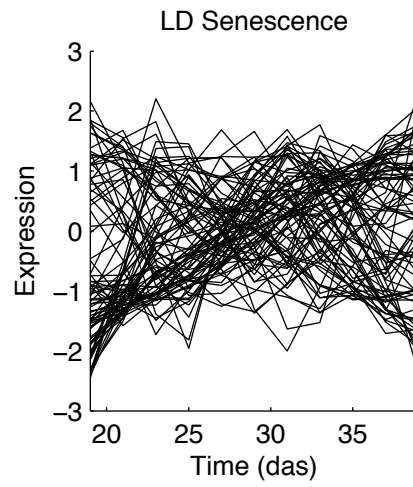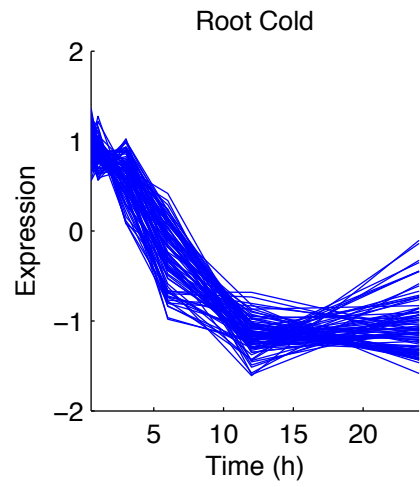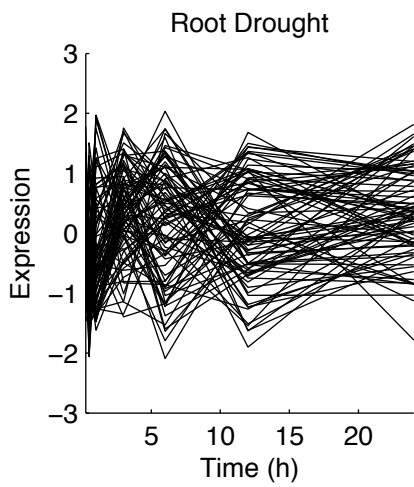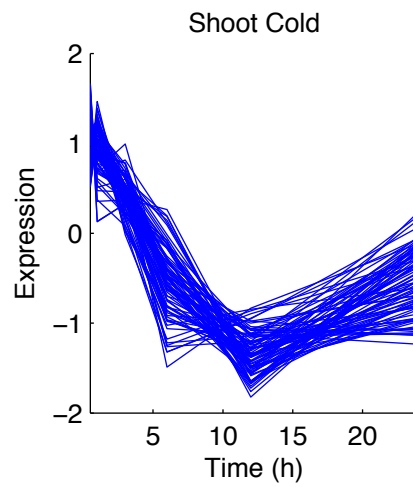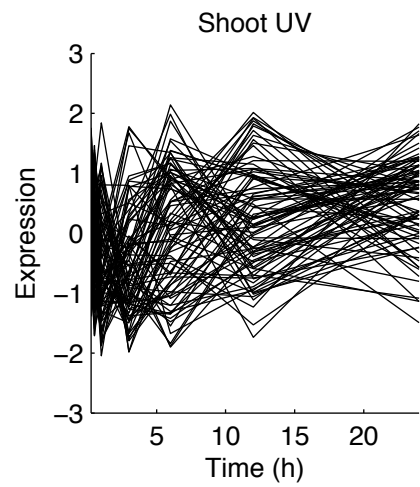

## Module20 – 1,5,6

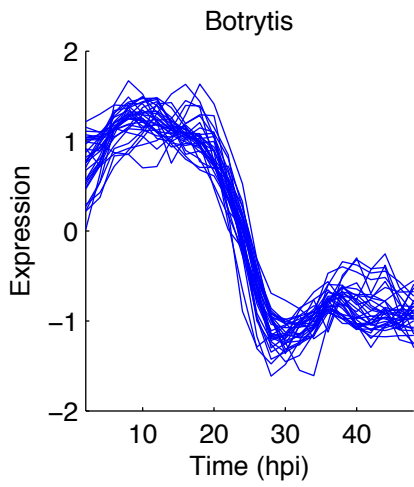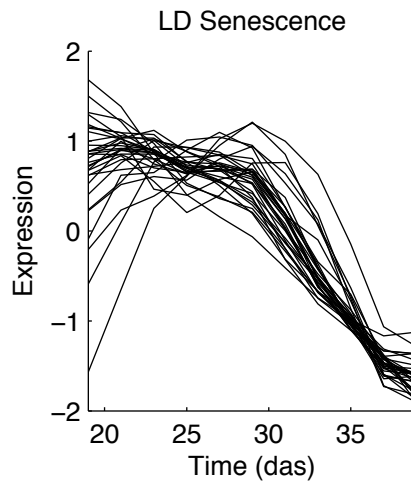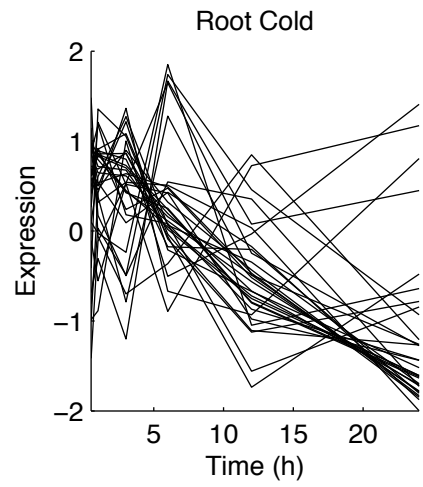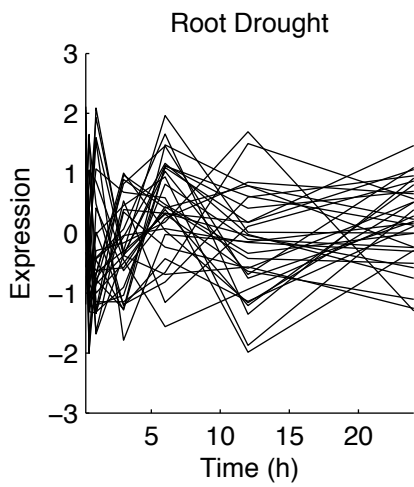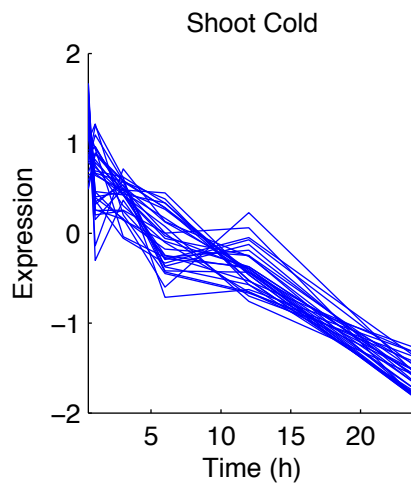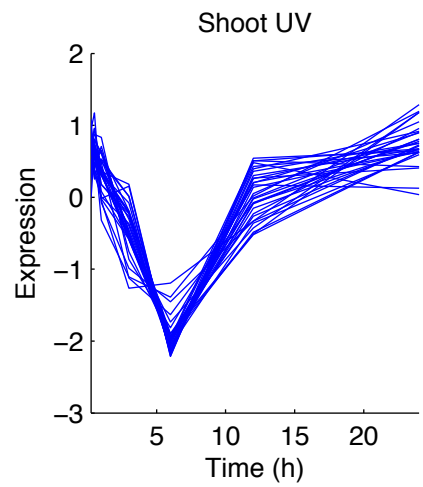

## Module21 – 3,5

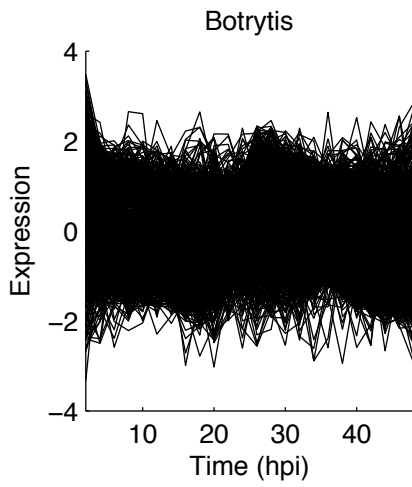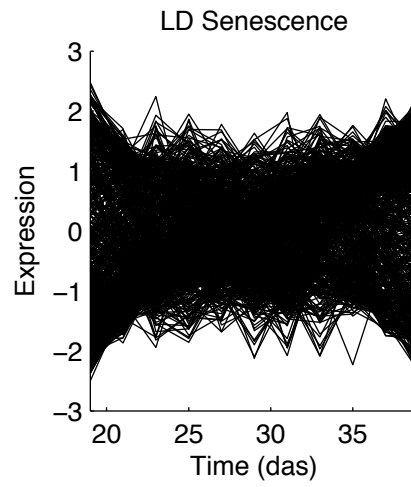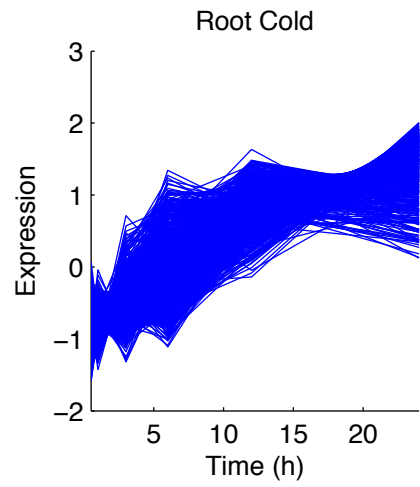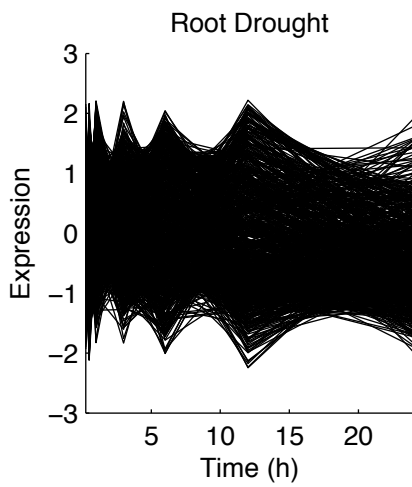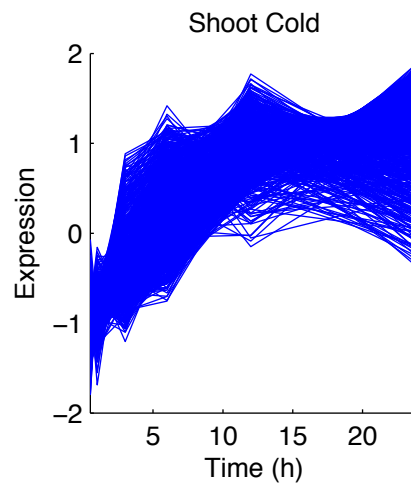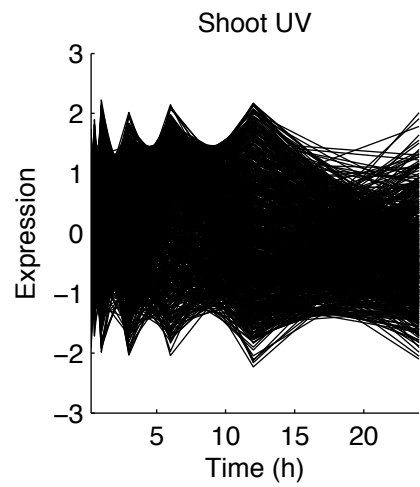

## Module22 – 3,4,5,6

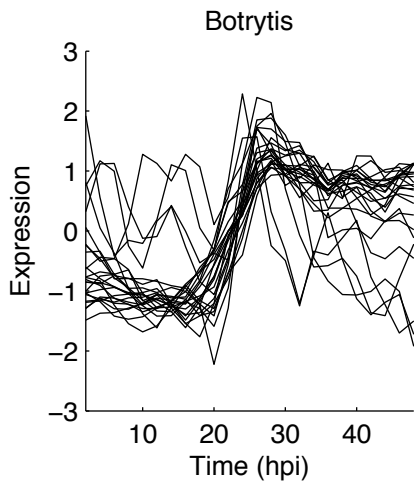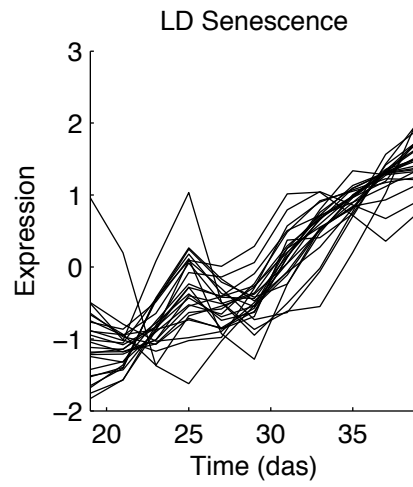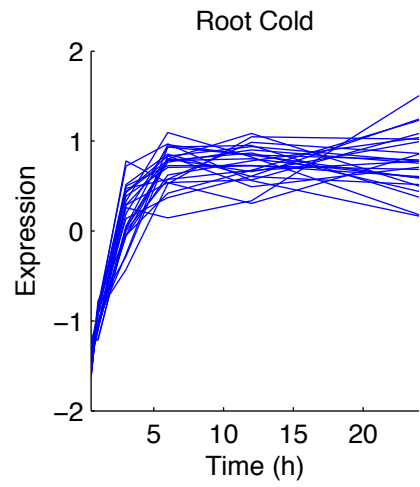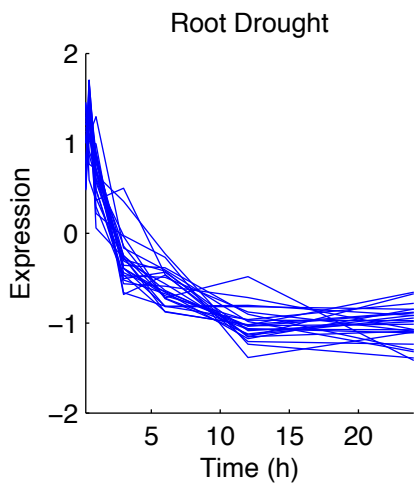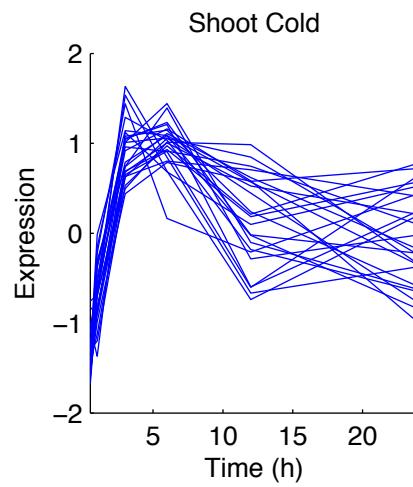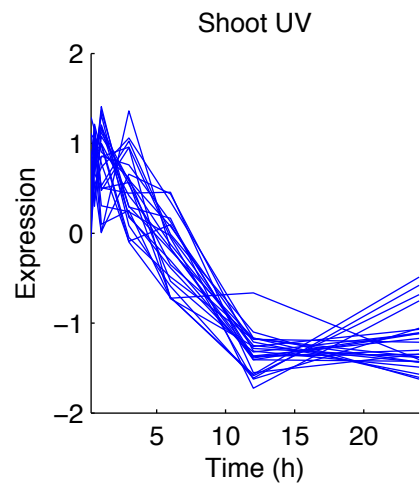

## Module23 – 5,6

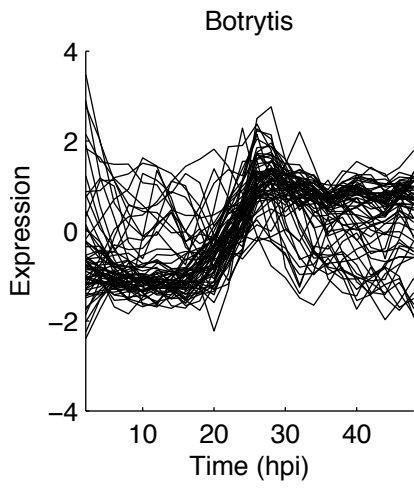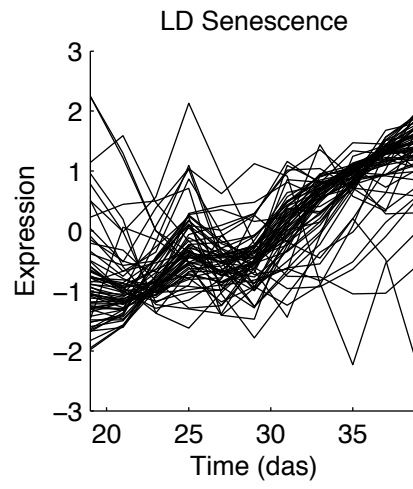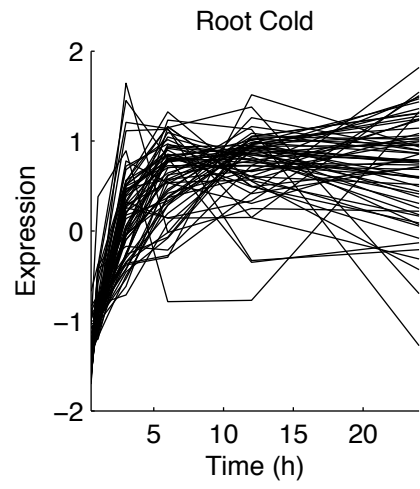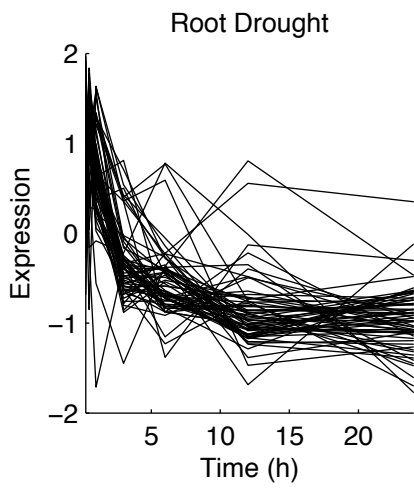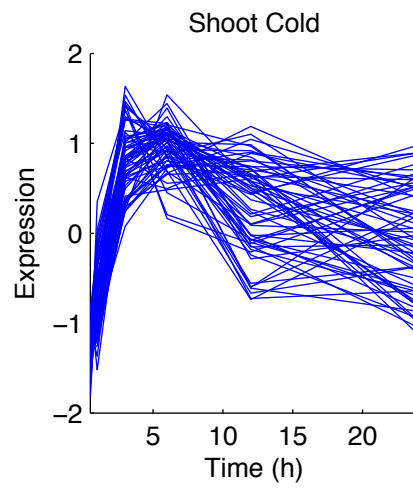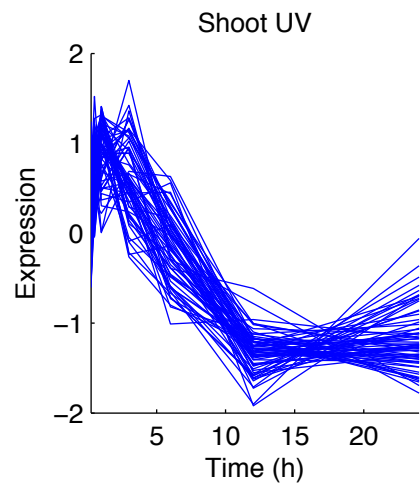



## Module24 – 4,5

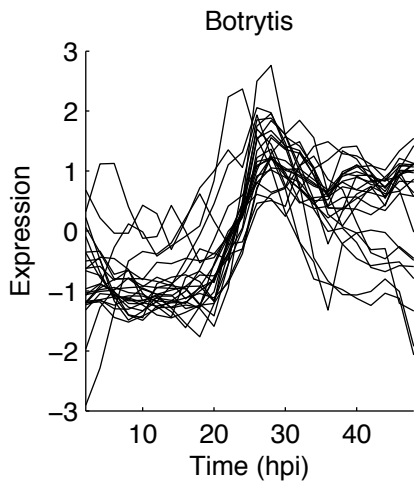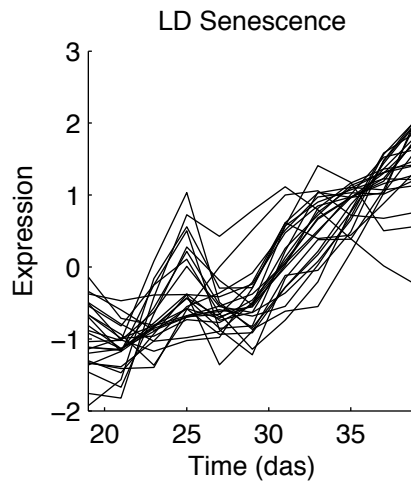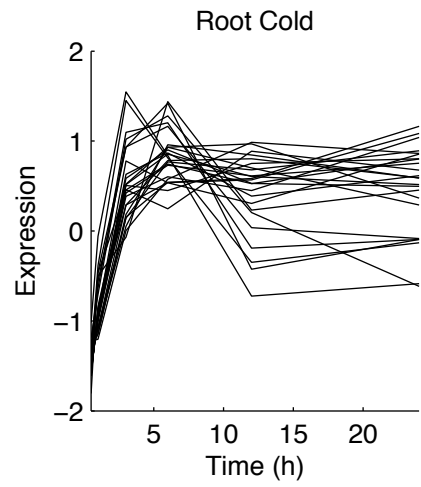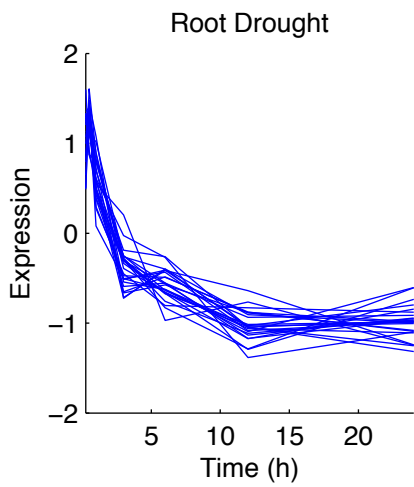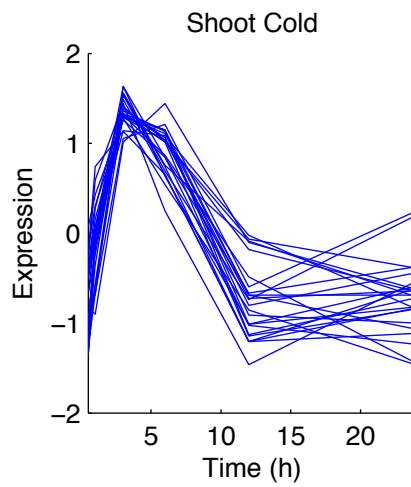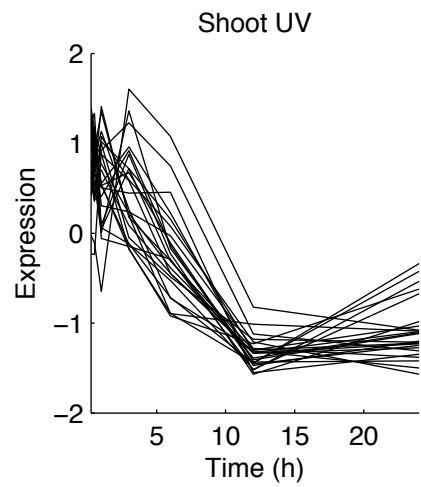

## Module25 – 1,6

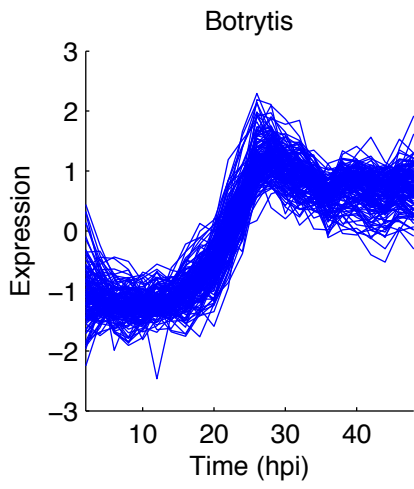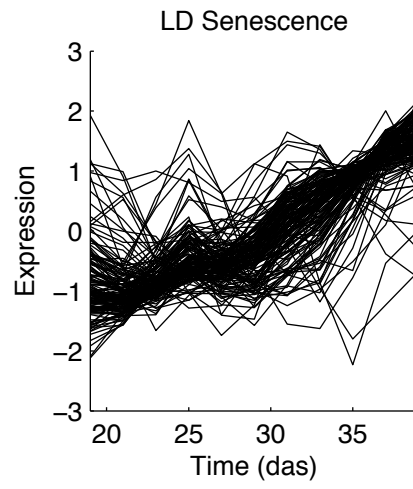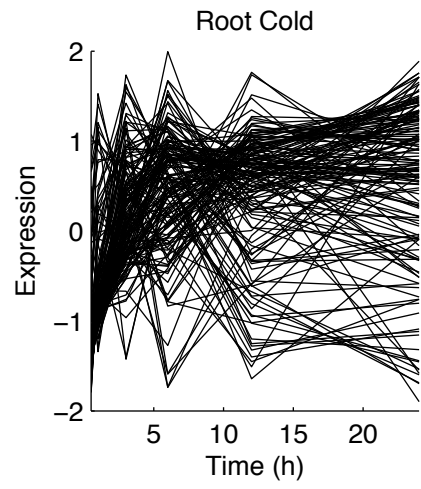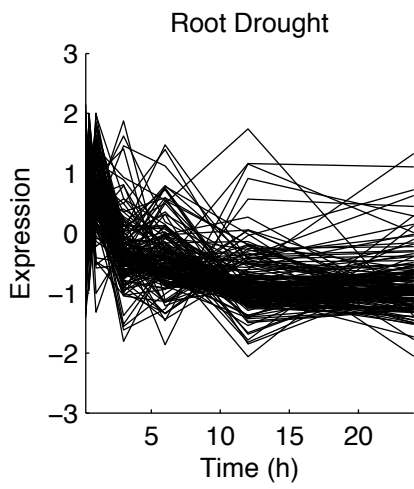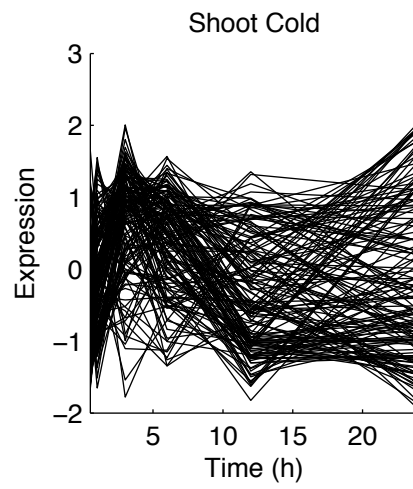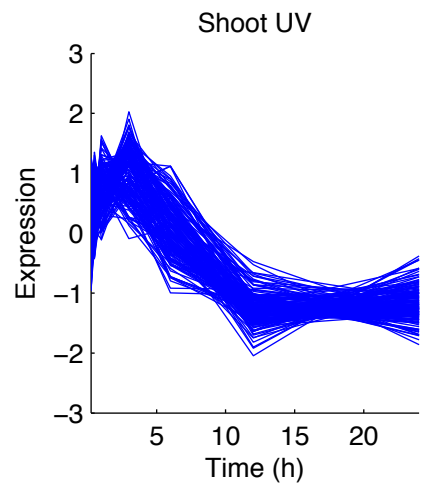

## Module26 – 1,6

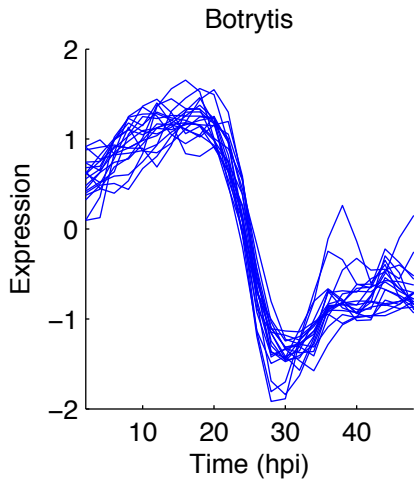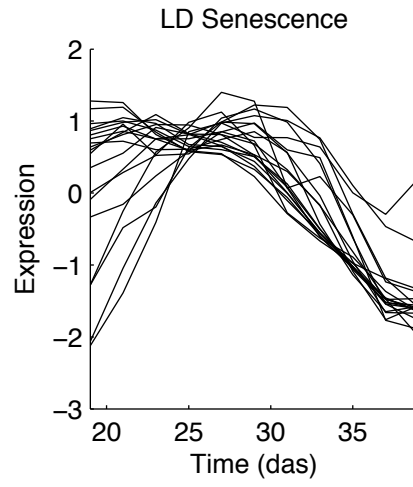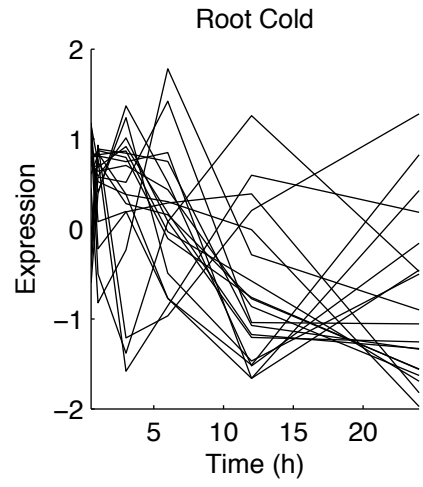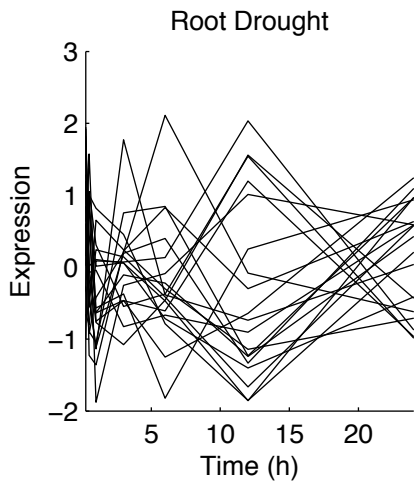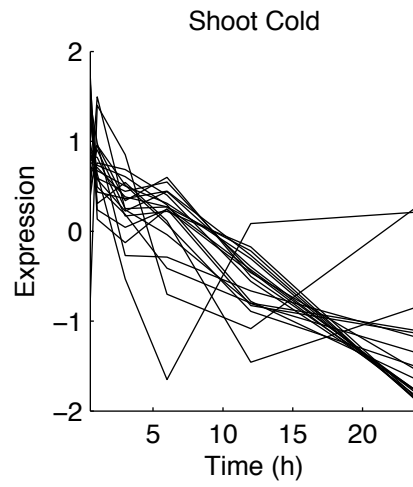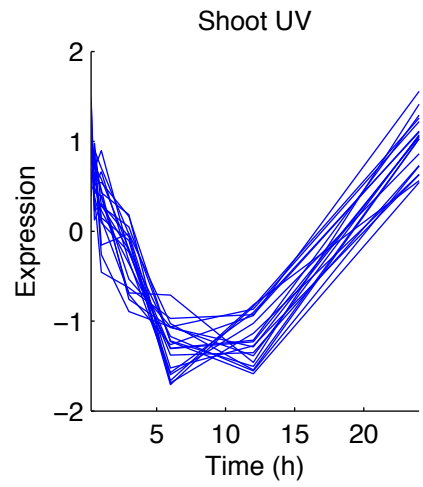

## Module27 – 4,6

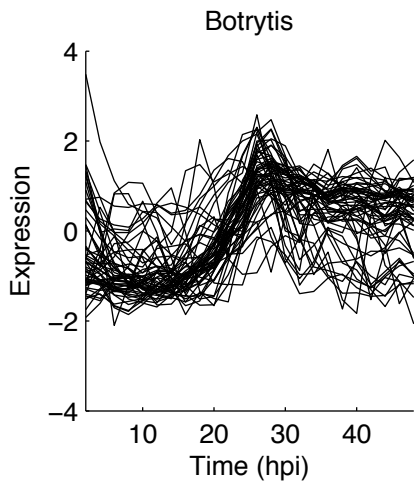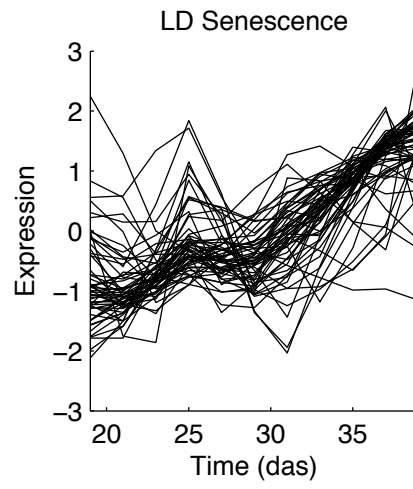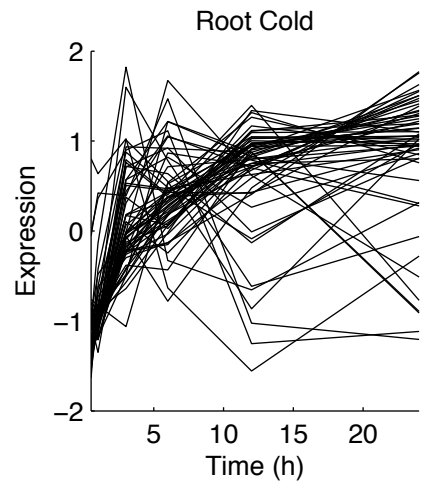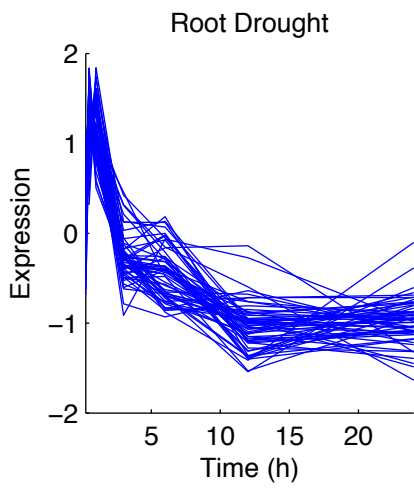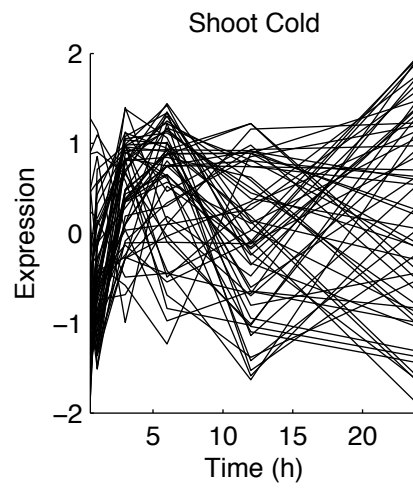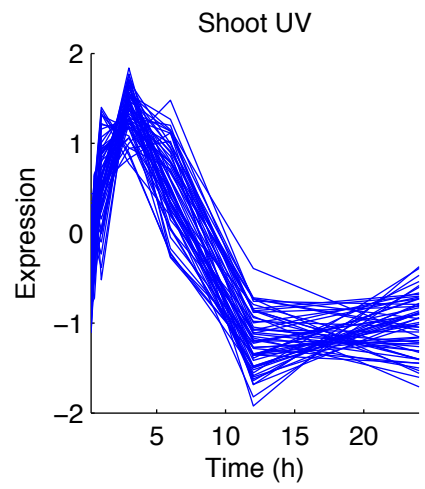

## Module28 – 1,2,3,6

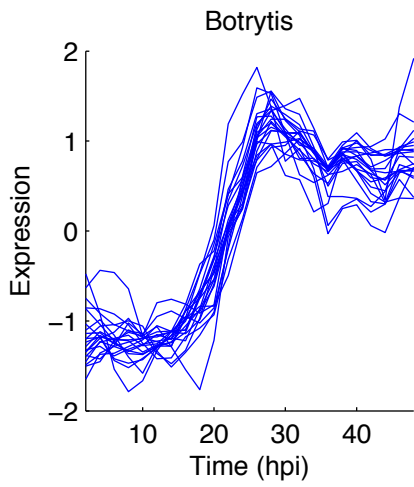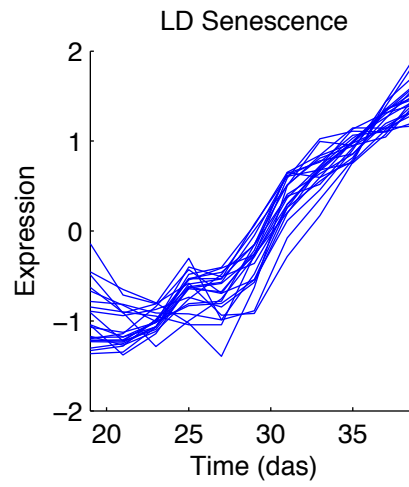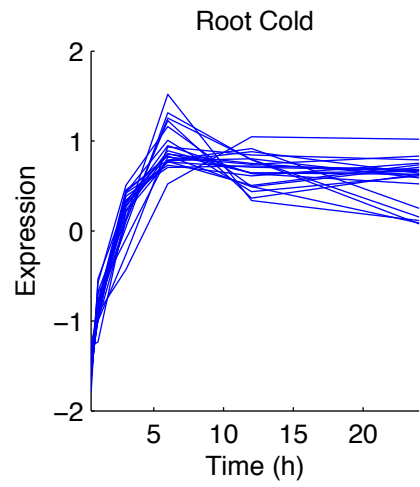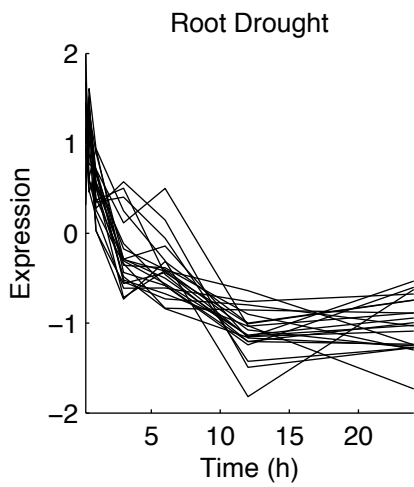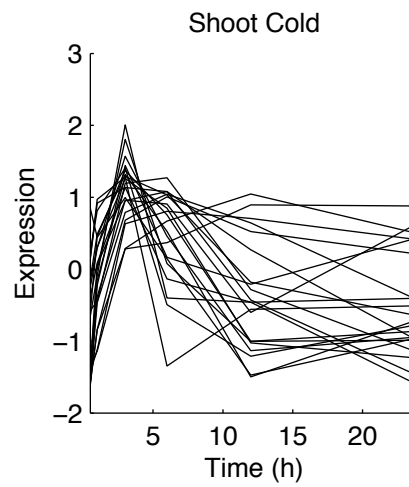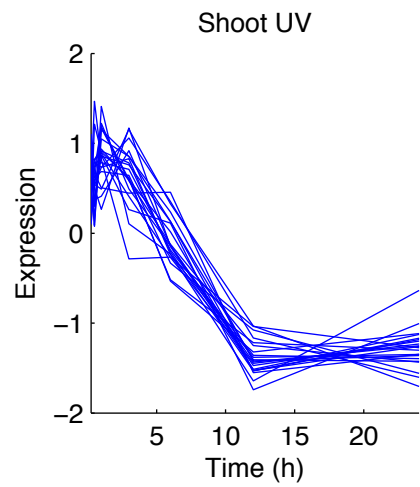

## Module29 – 2,3,6

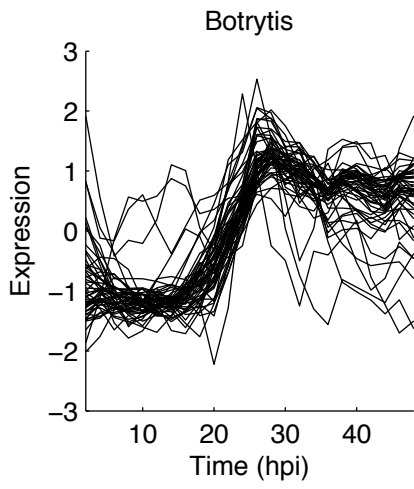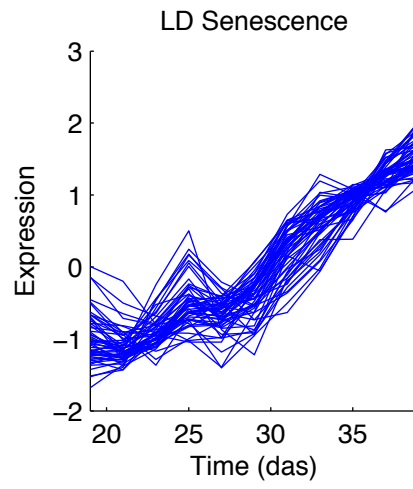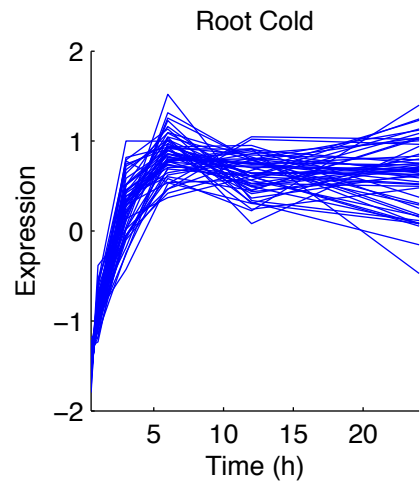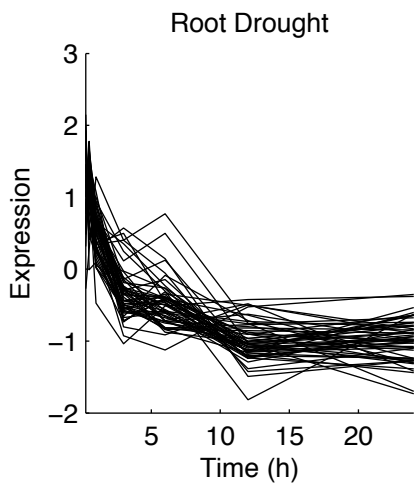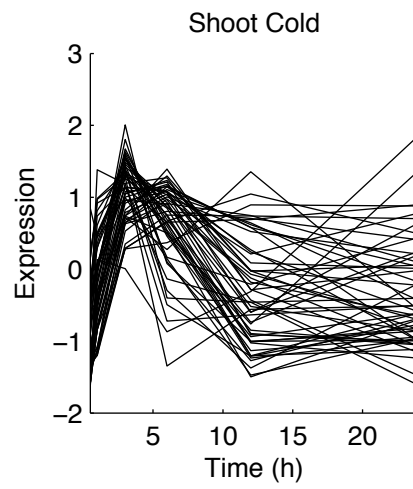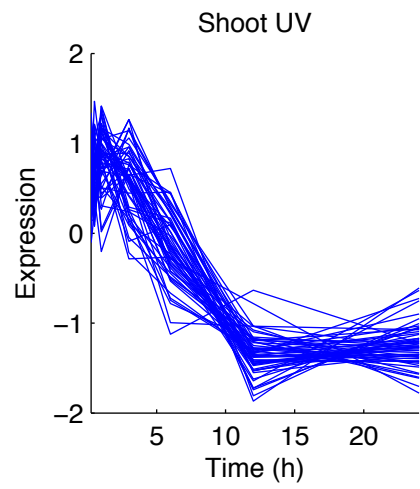

## Module30 – 1,6

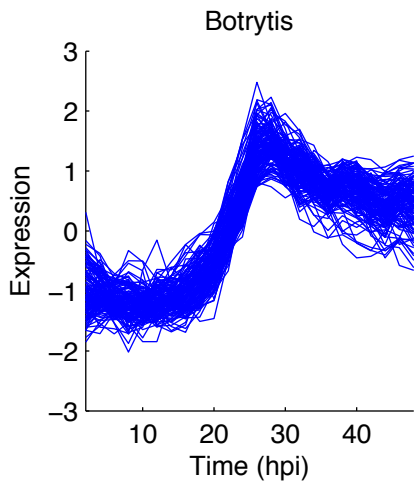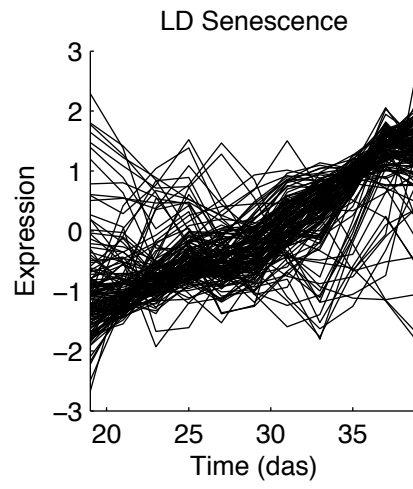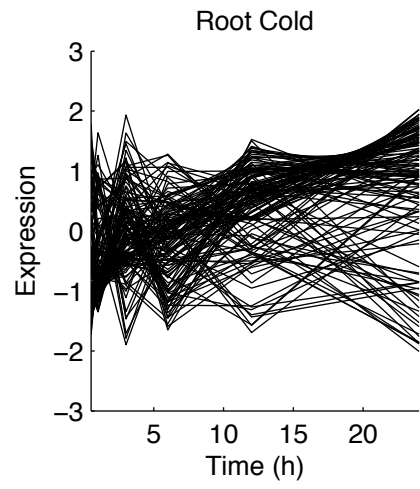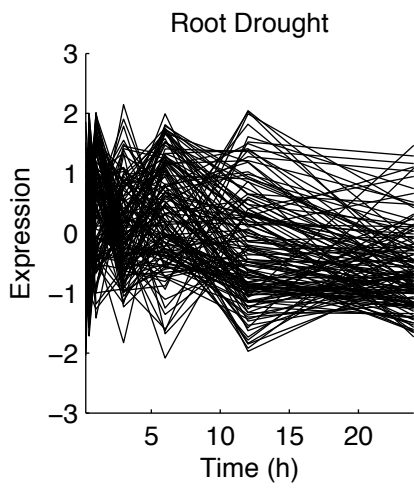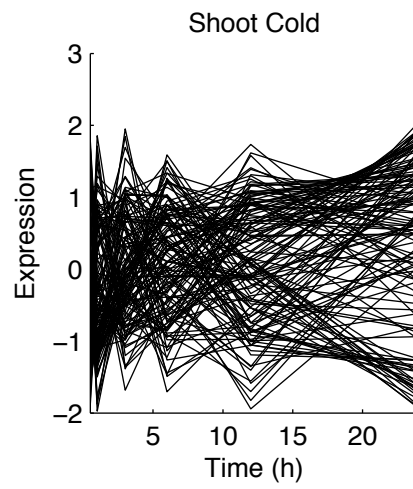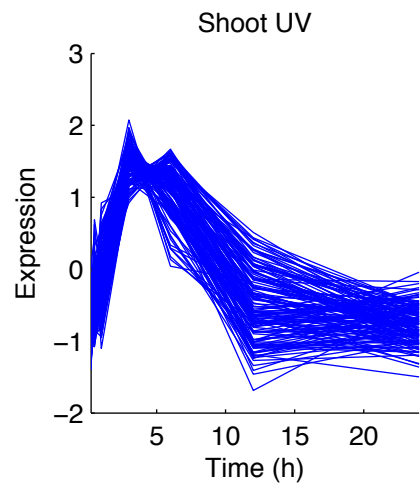

## Module31 – 2,3,4,6

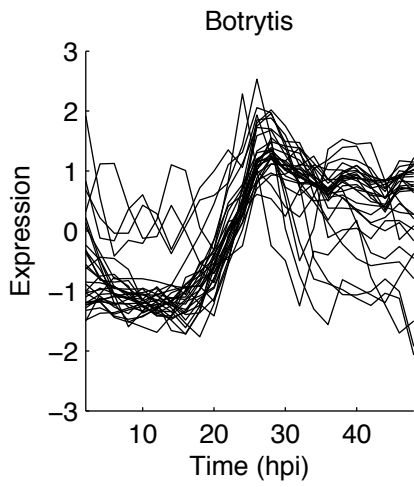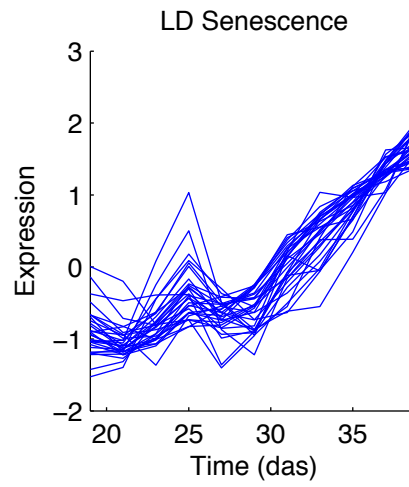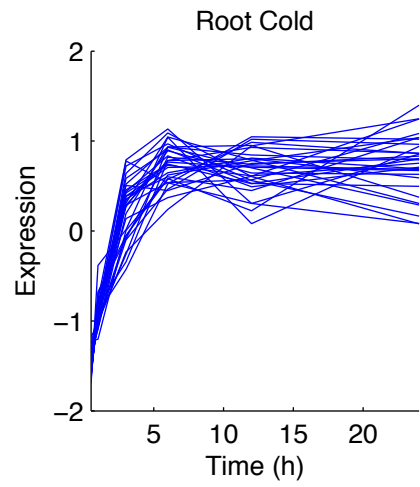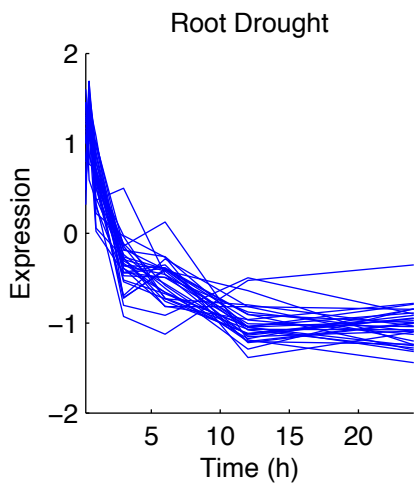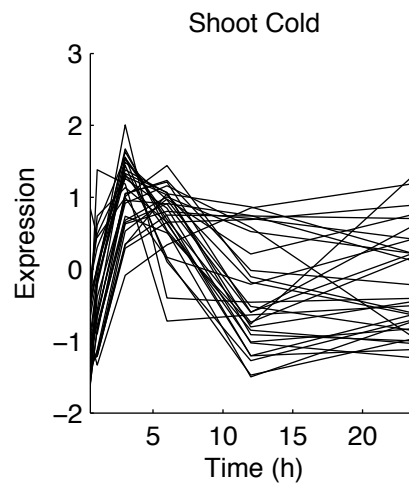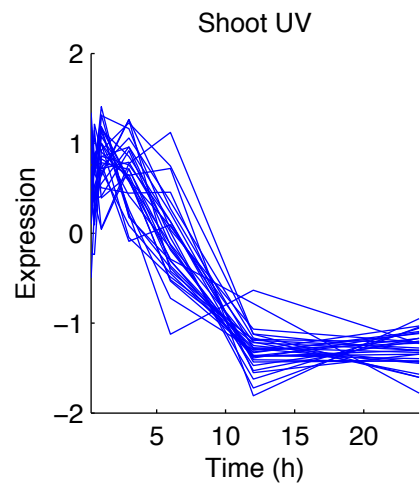



## Module32 – 3,4,6

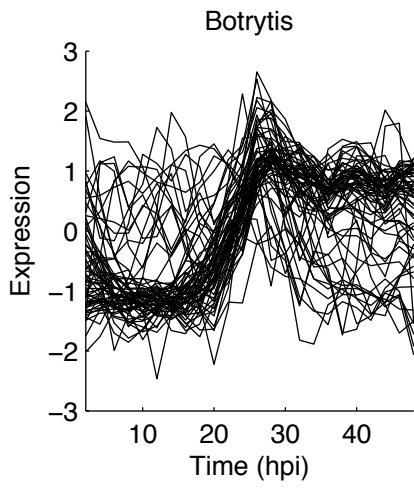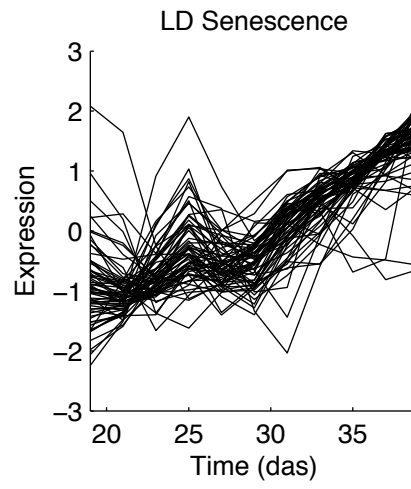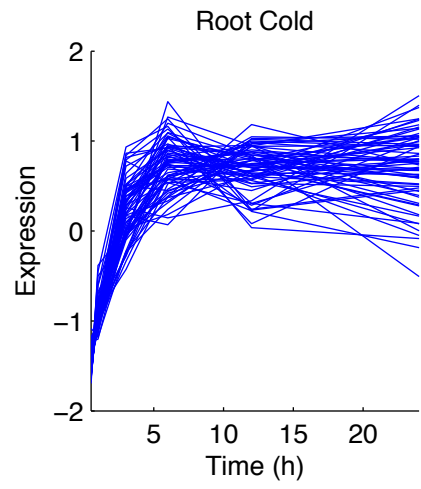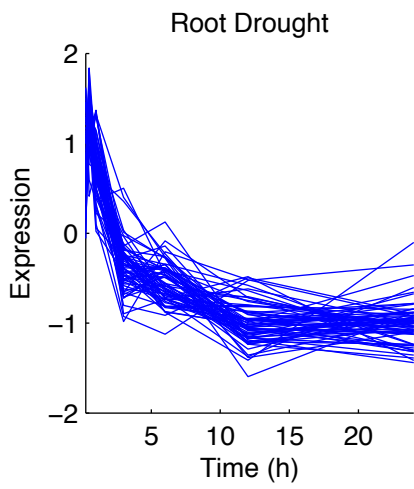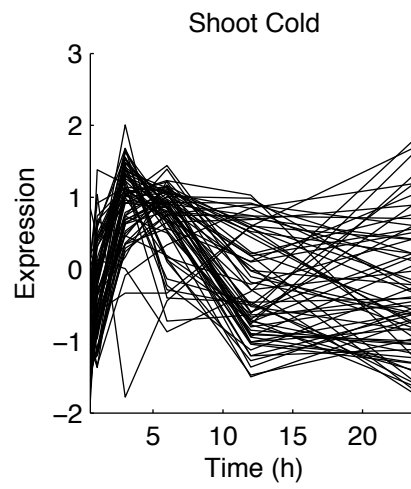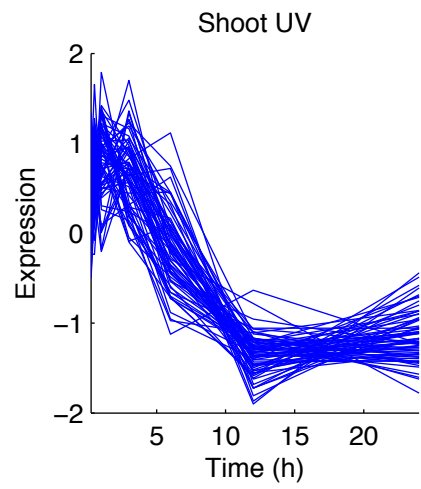

## Module33 – 2,4

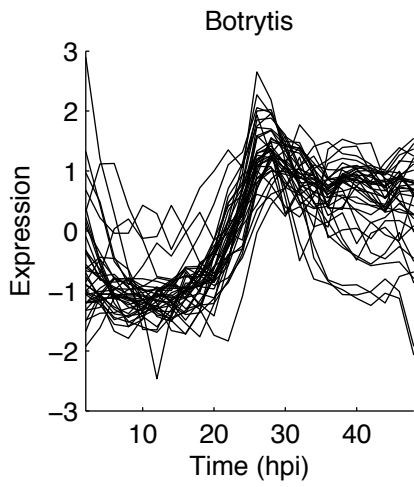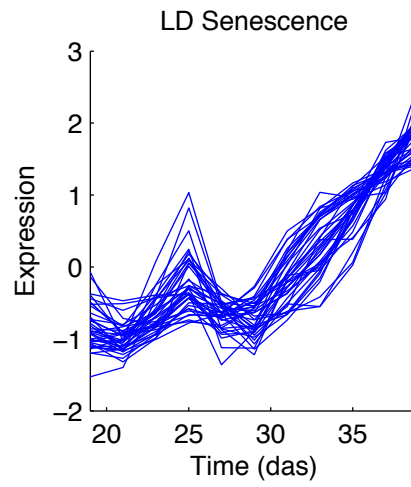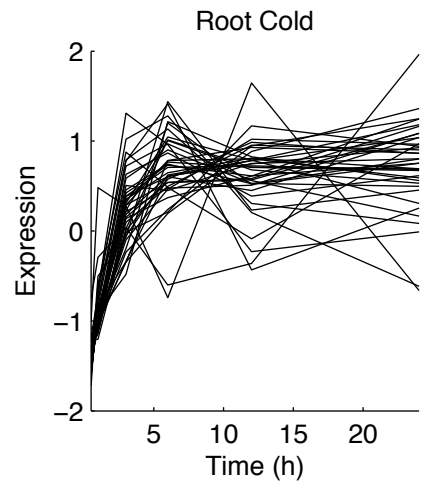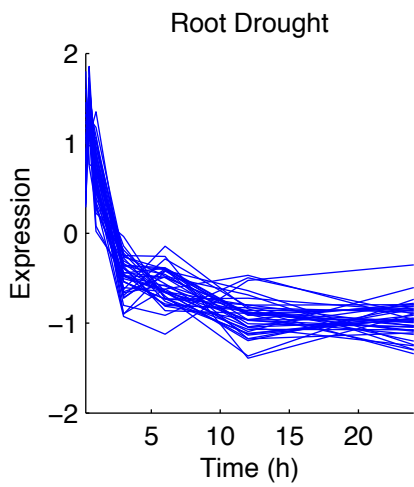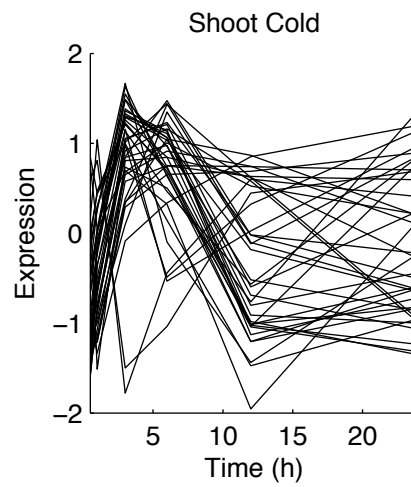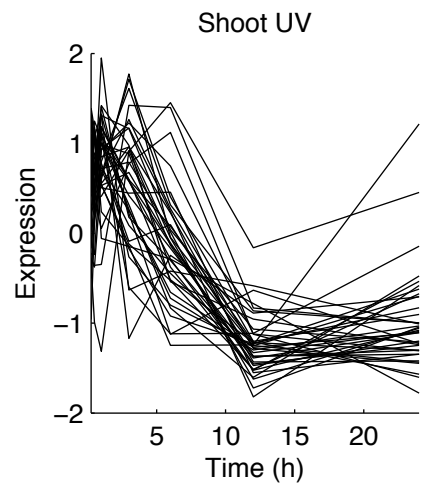

## Module34 – 3,6

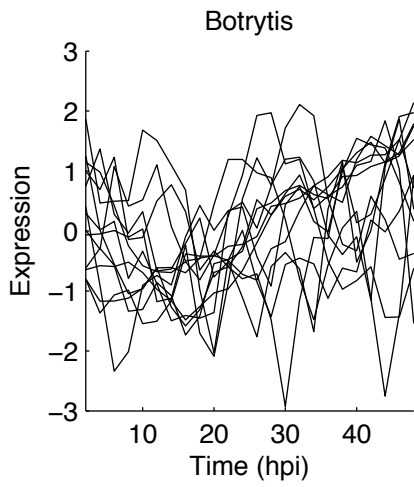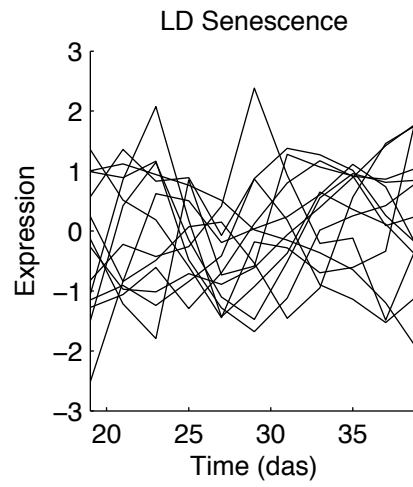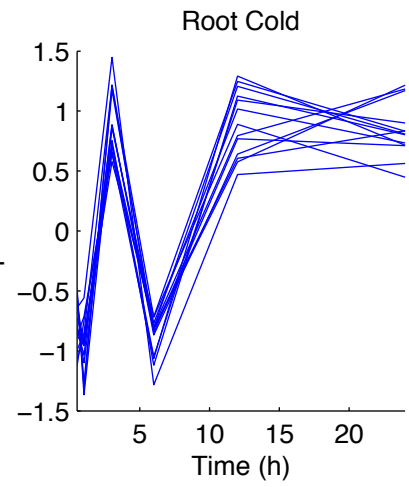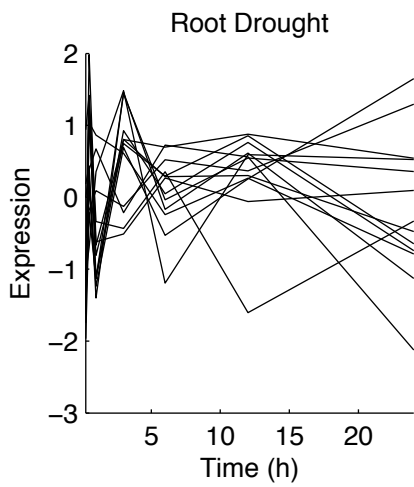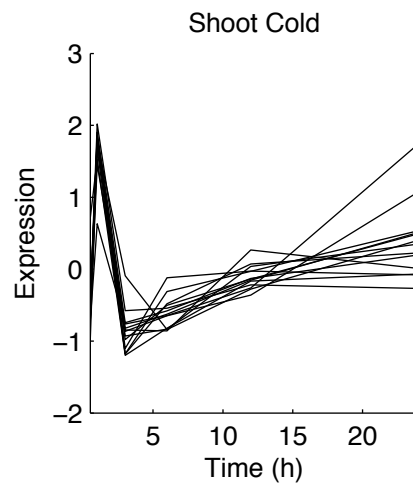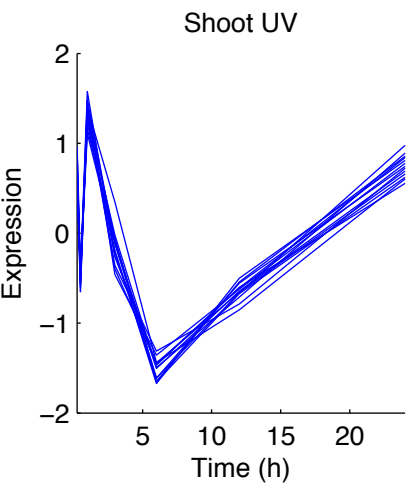

## Module35 – 3,6

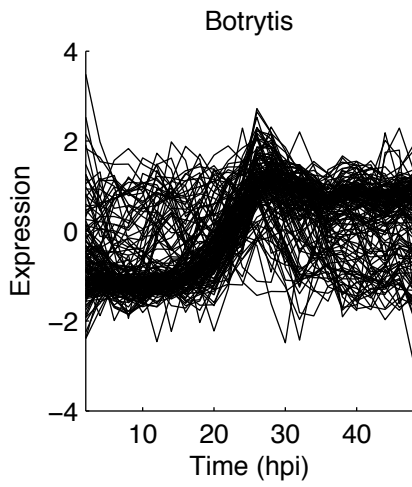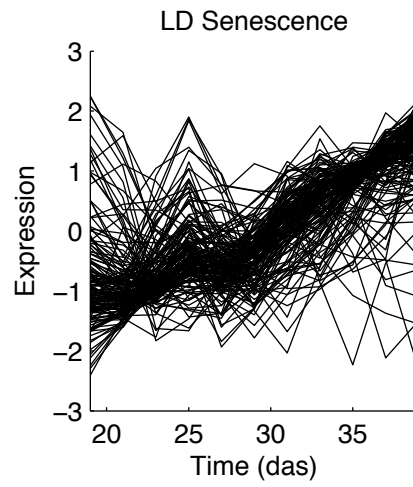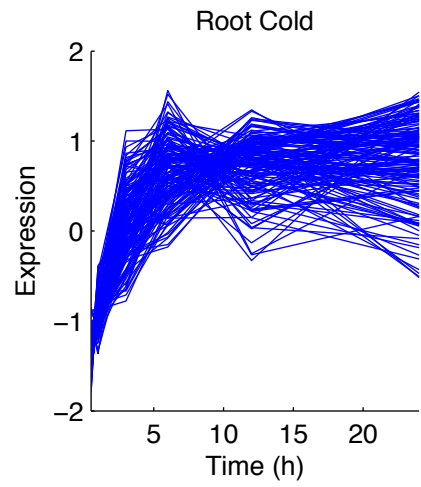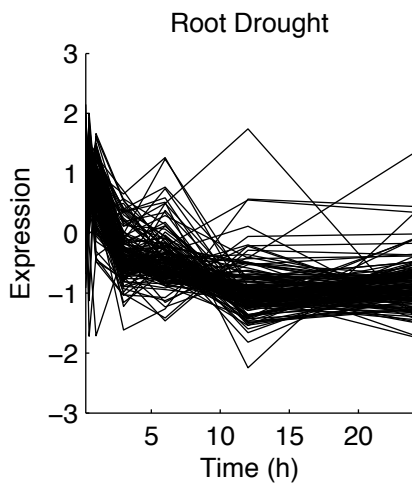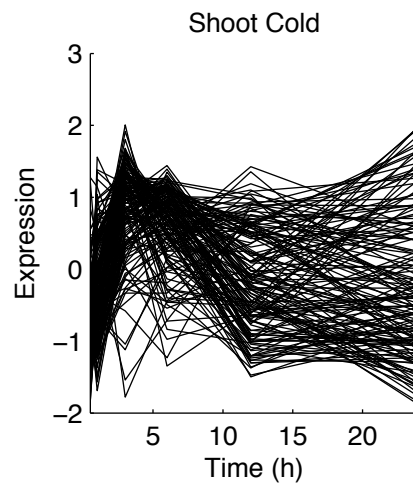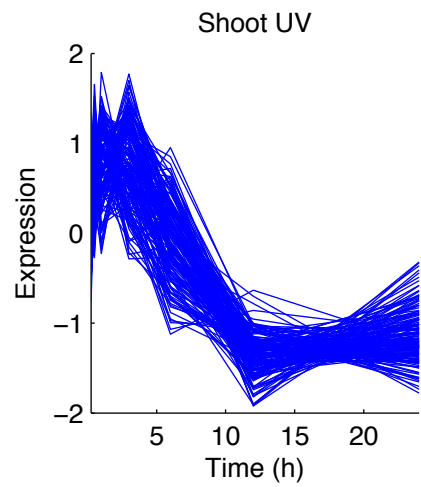

## Module36 – 1,2,6

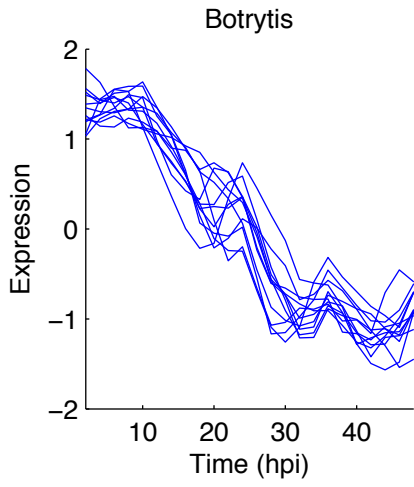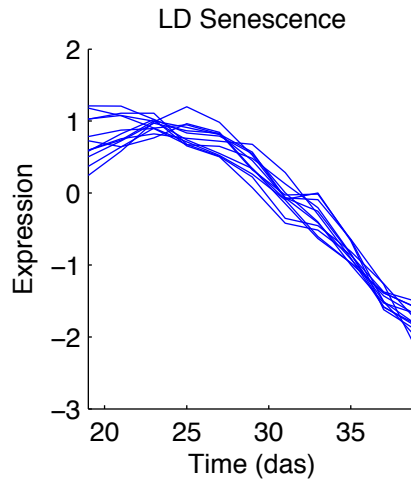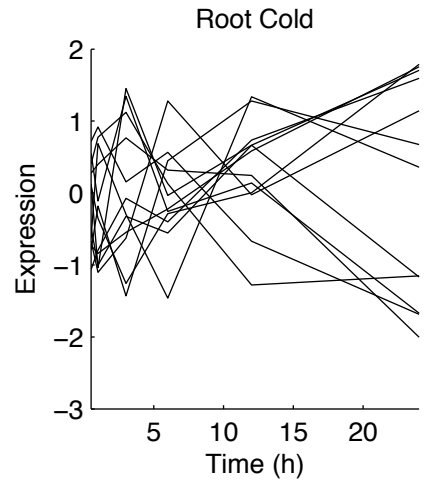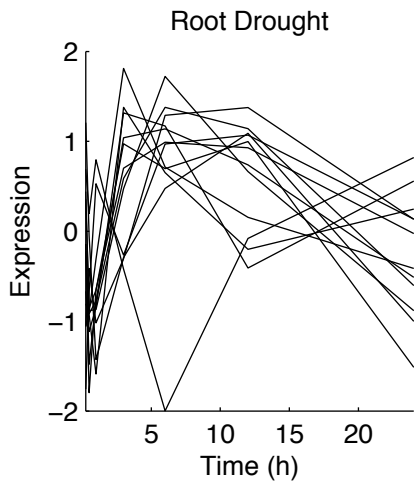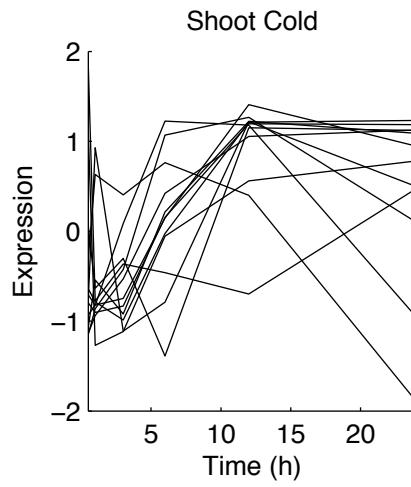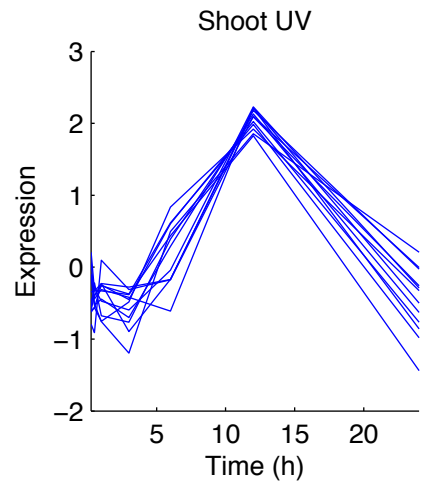

## Module37 – 2,5

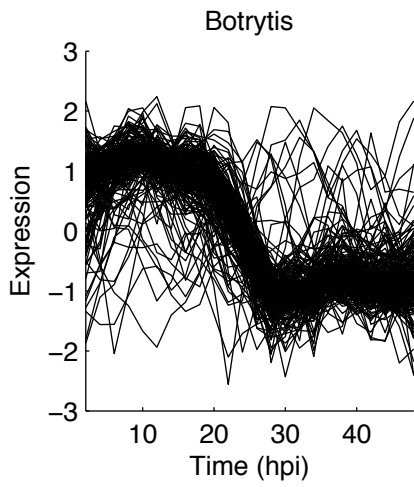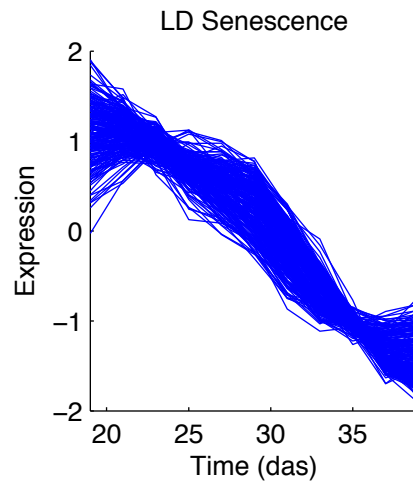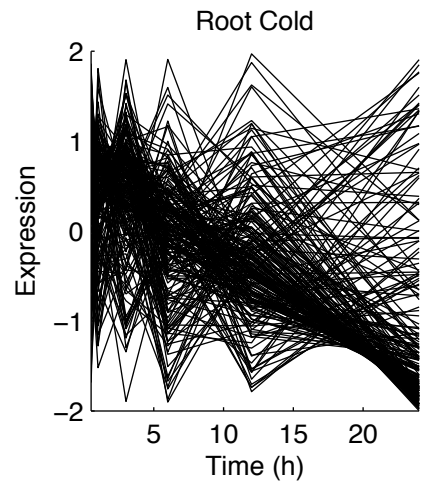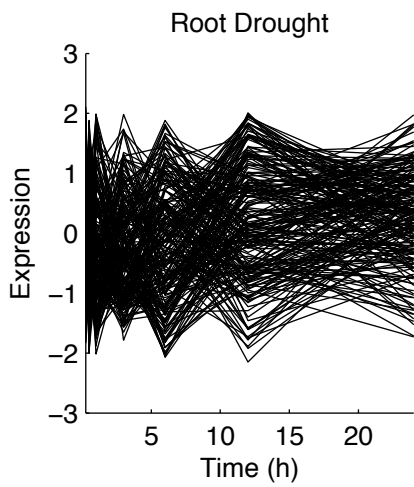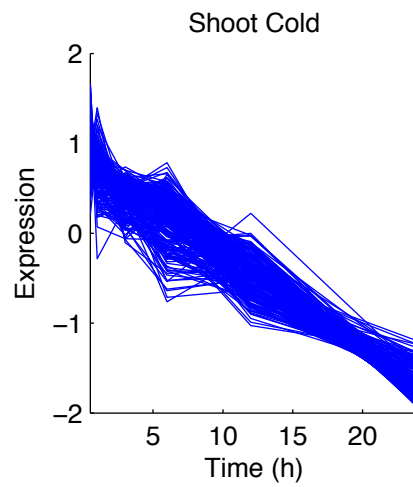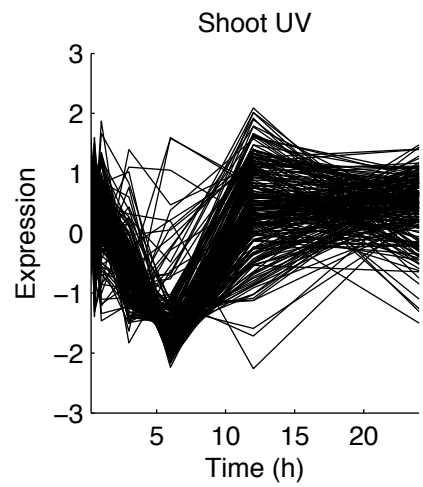

## Module38 – 1,5,6

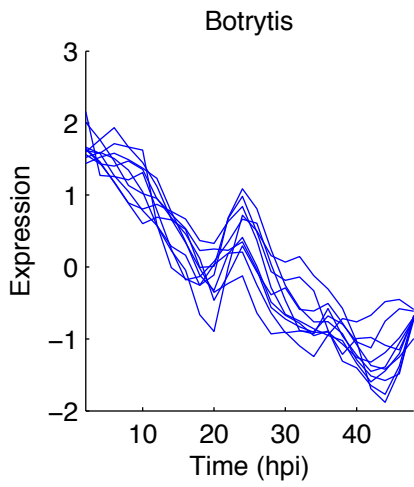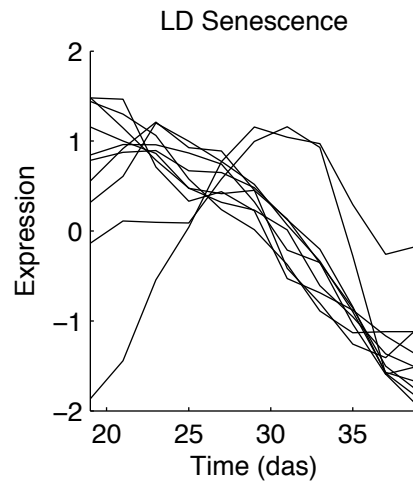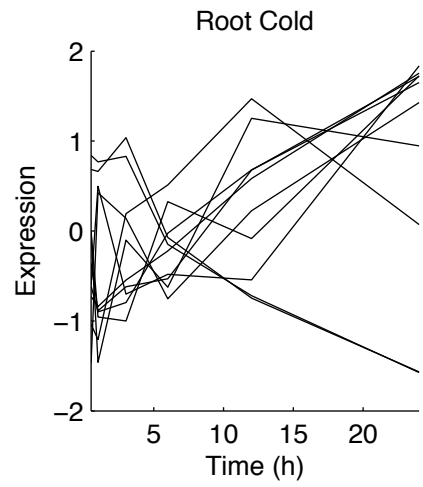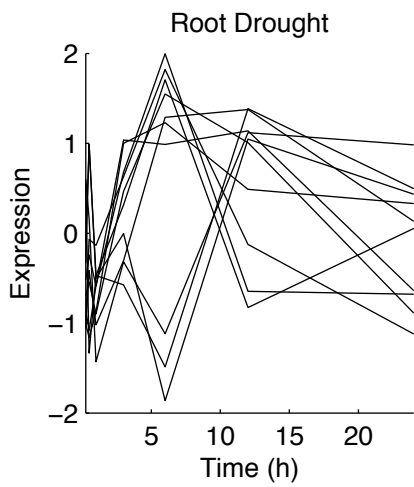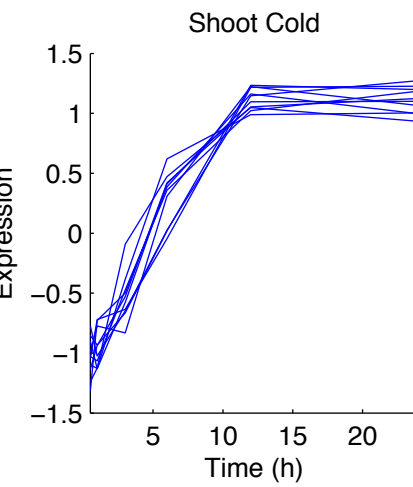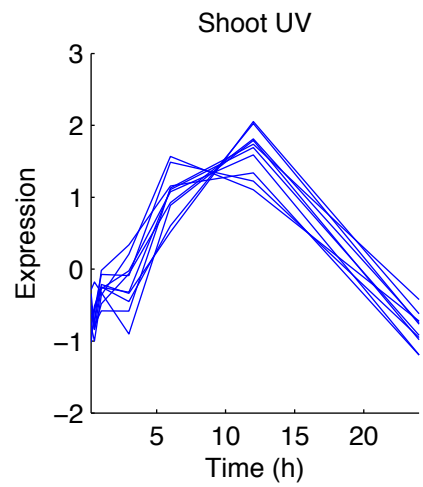

## Module39 – 3,4,6

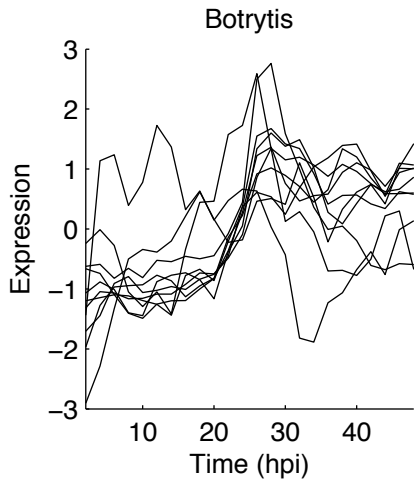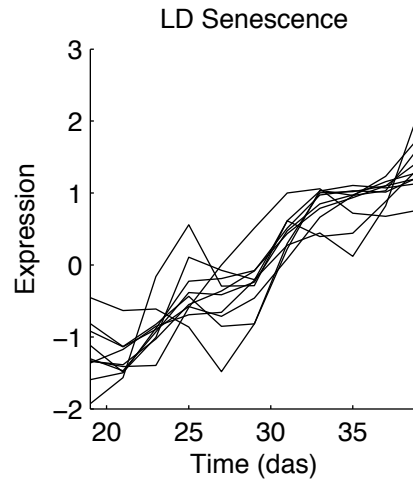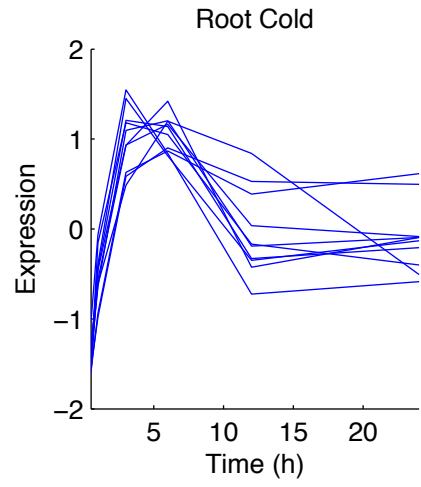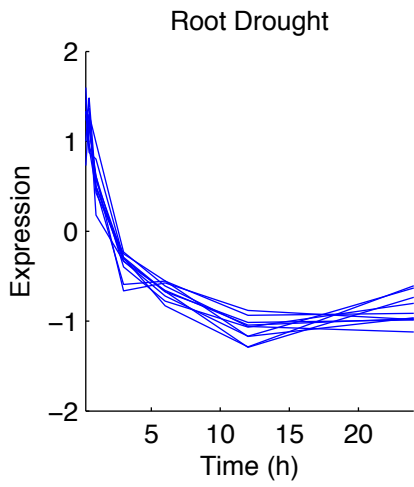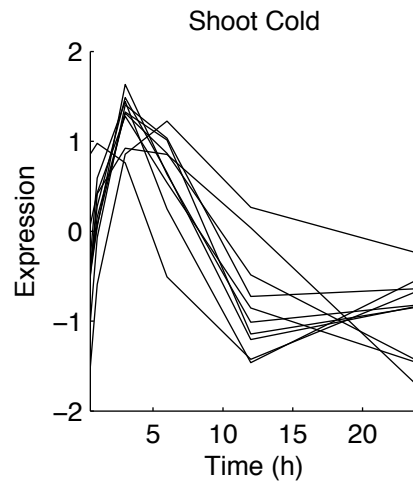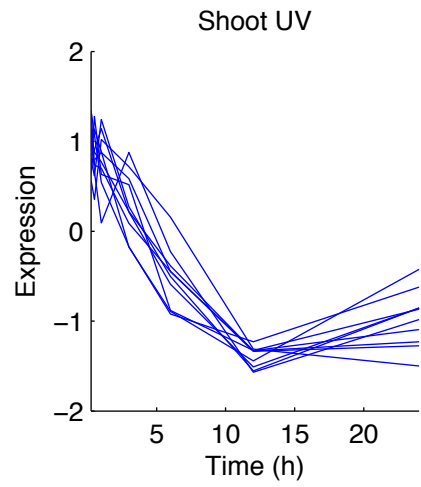



## Module40 – 1,3,5

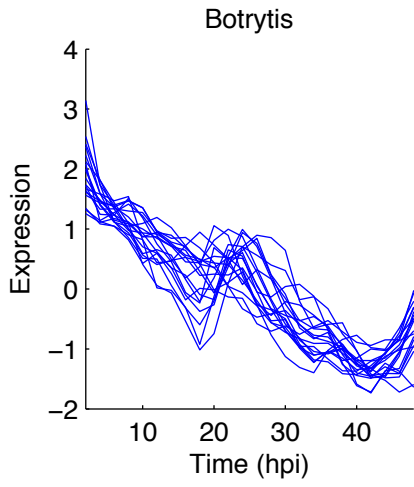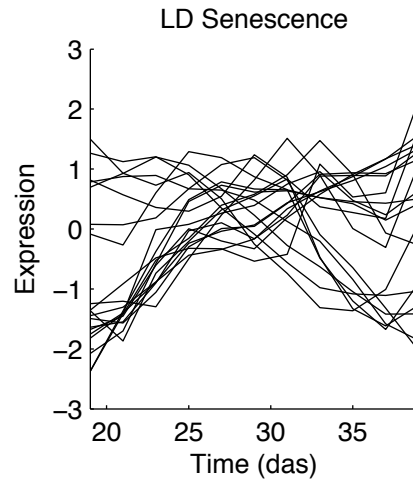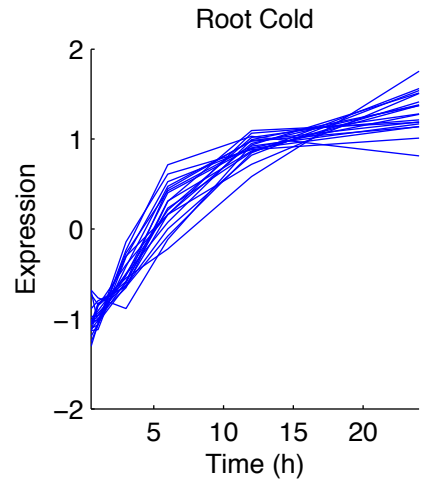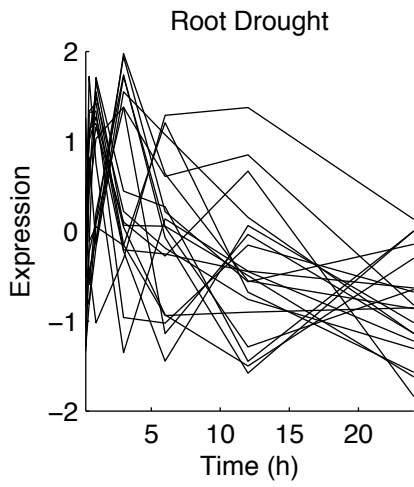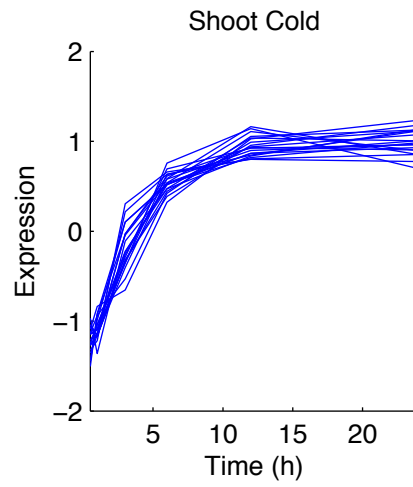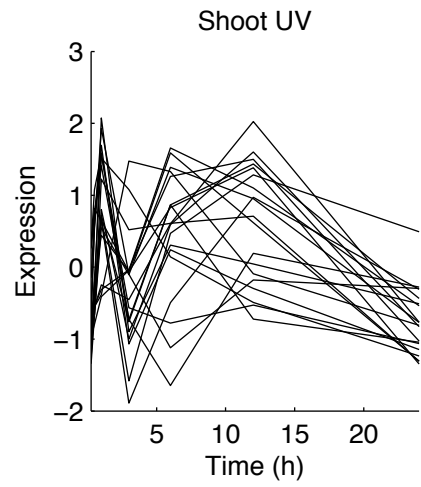

## Module41 – 5,6

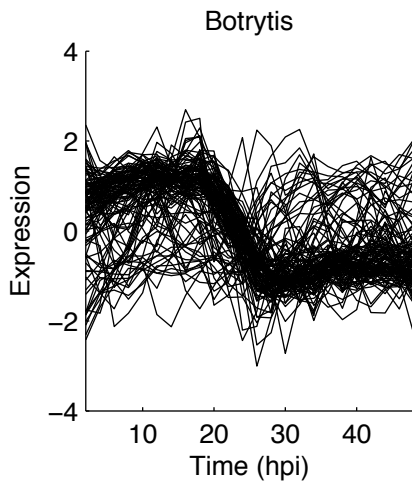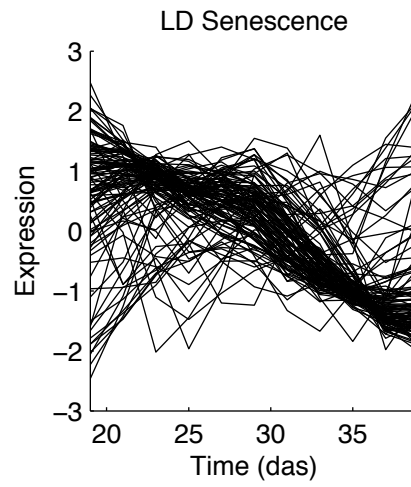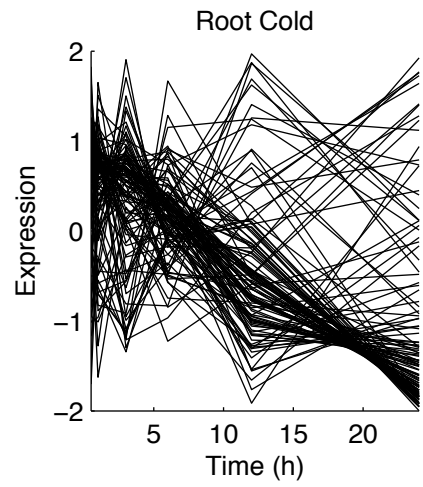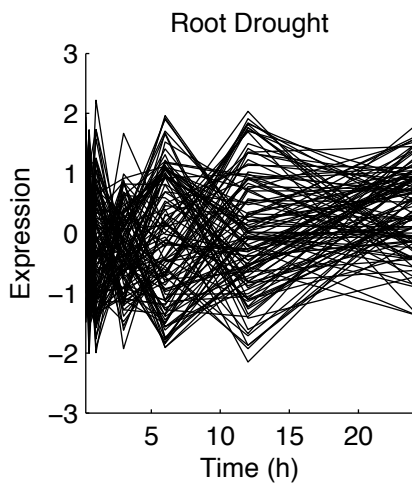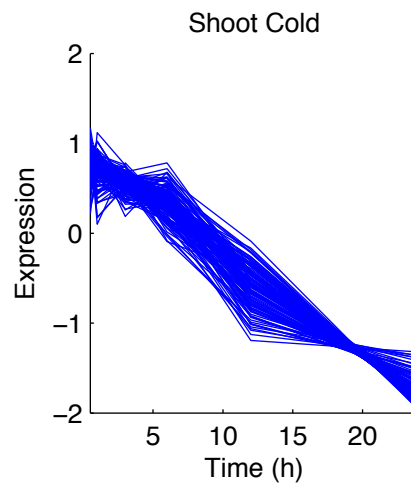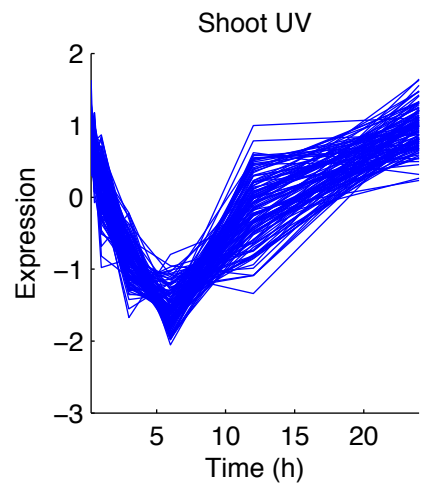

## Module42 – 1,3,6

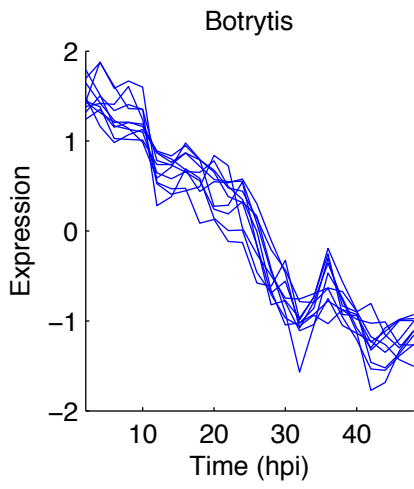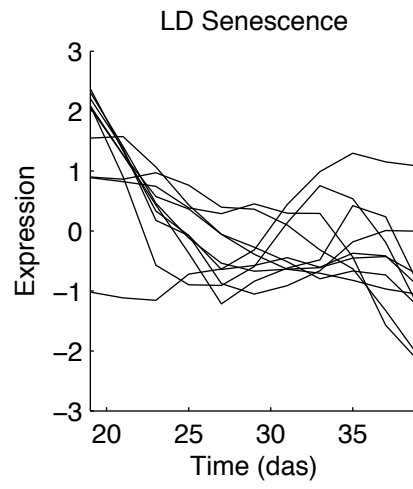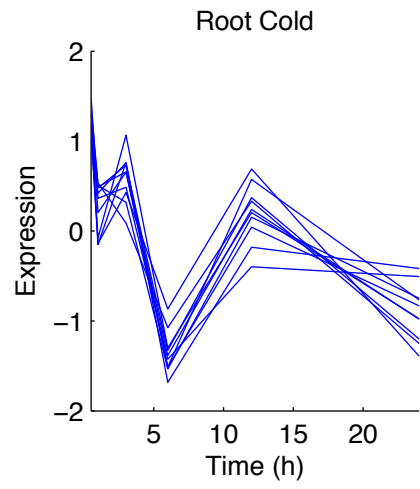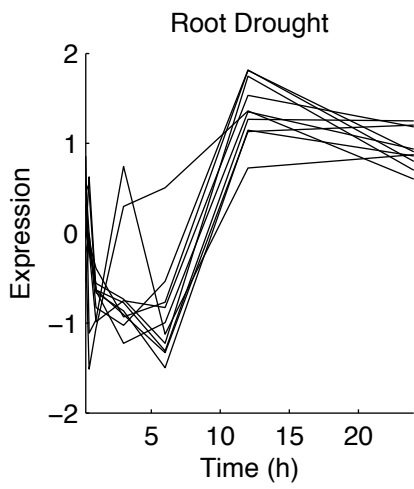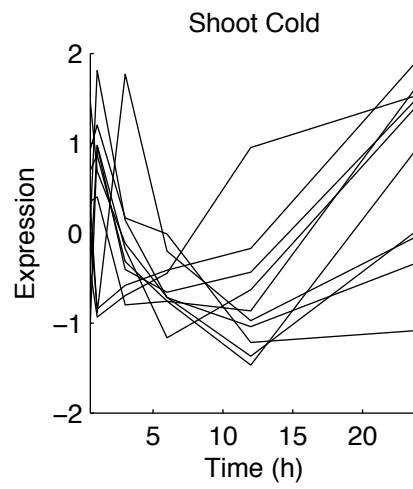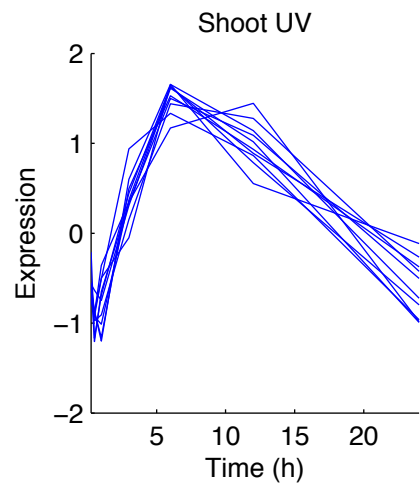

## Module43 – 1,5,6

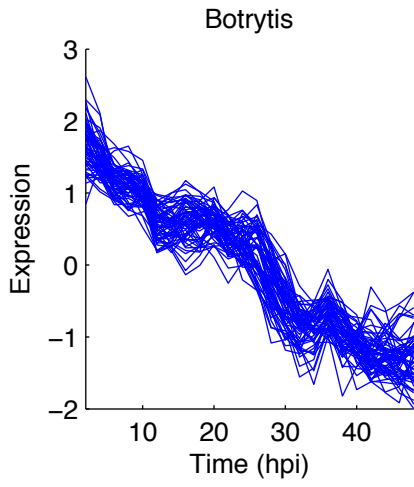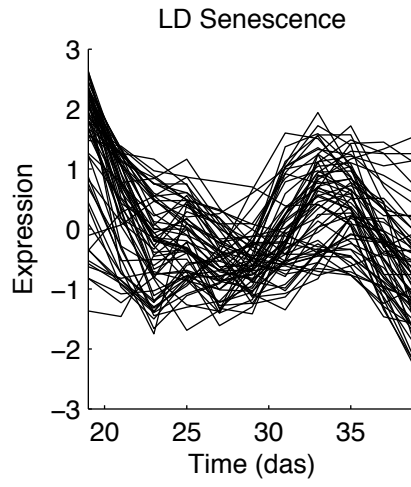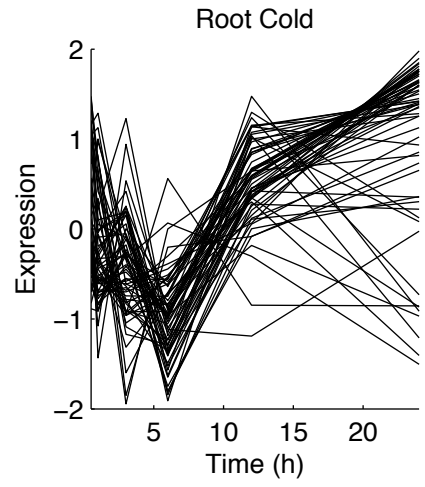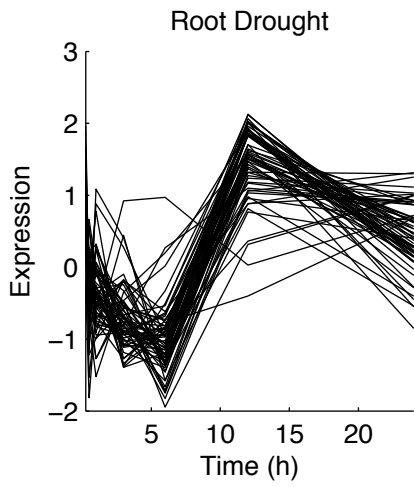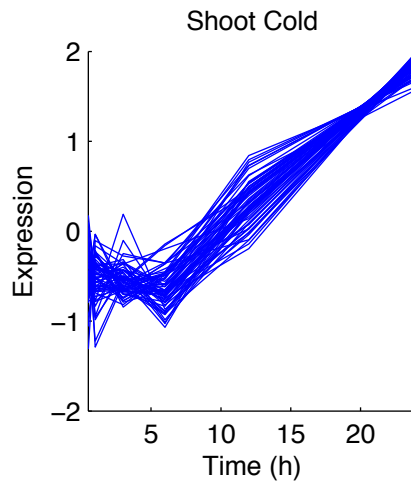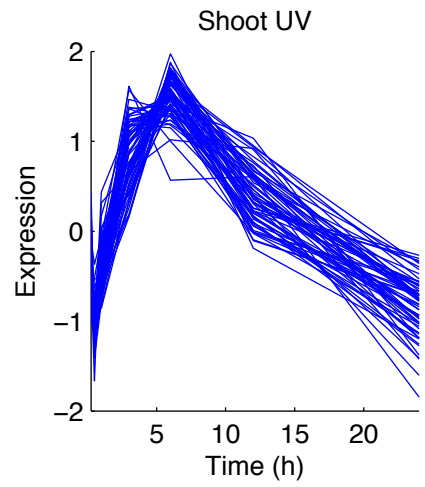

## Module44 – 1,3,5,6

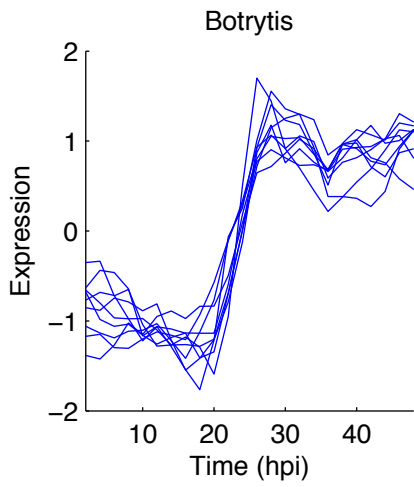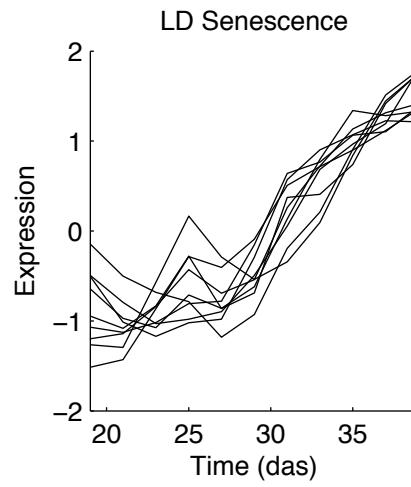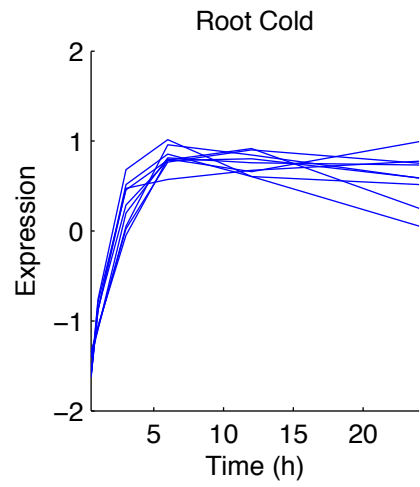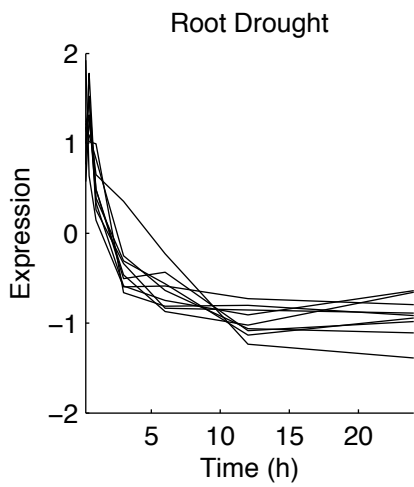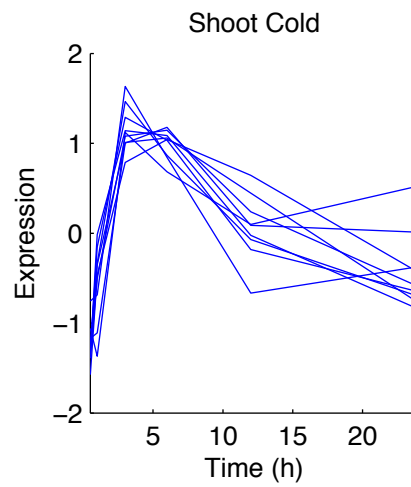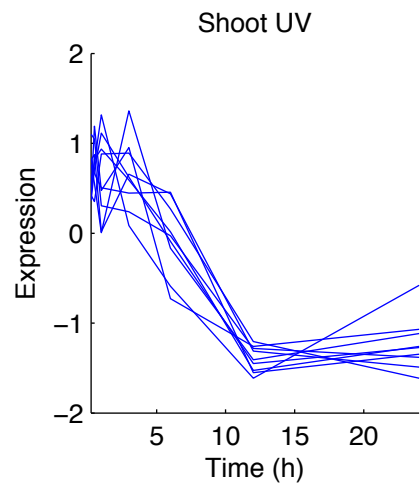

## Module45 – 2,5,6

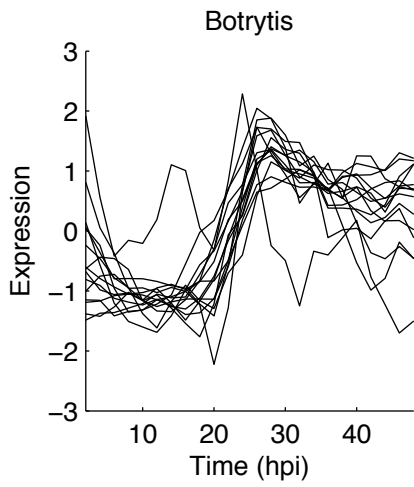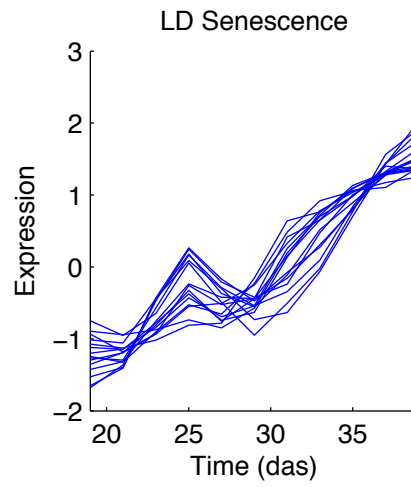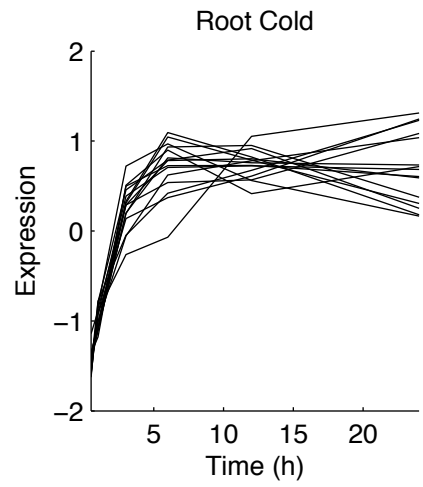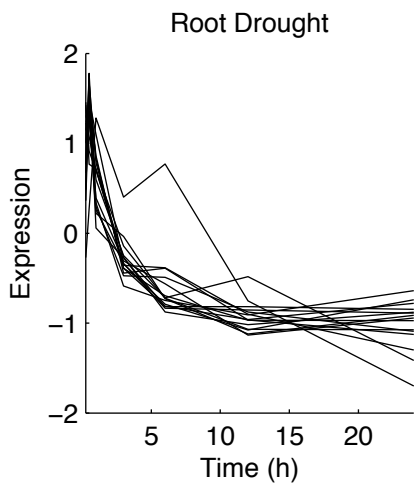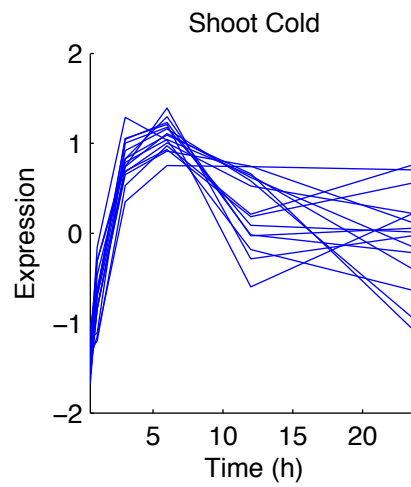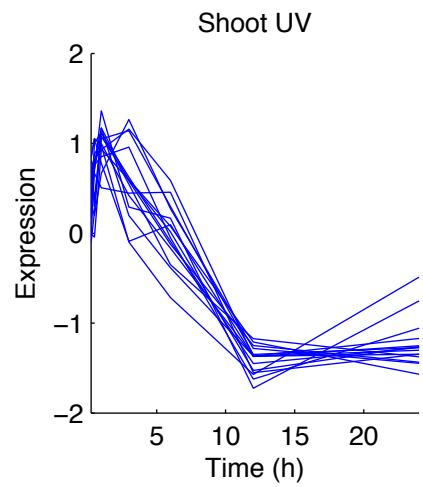

## Module46 – 3,5

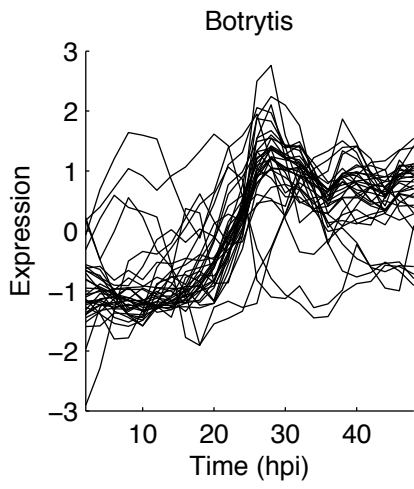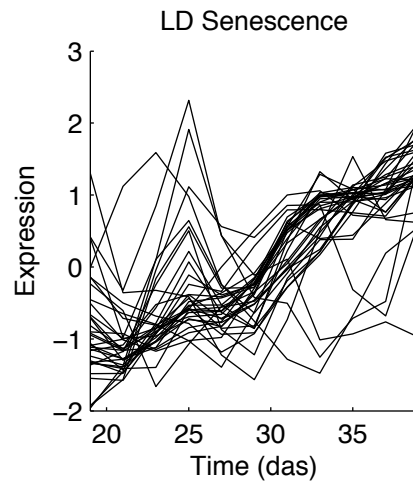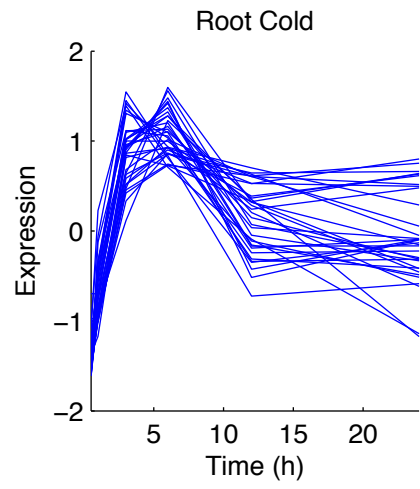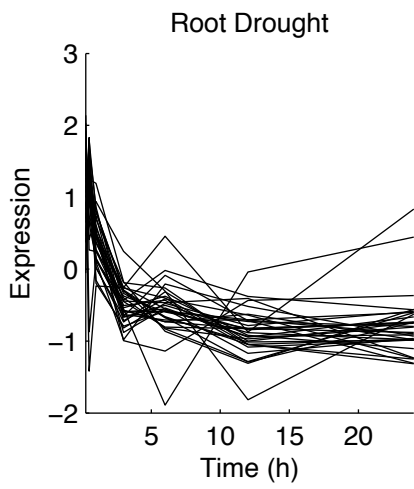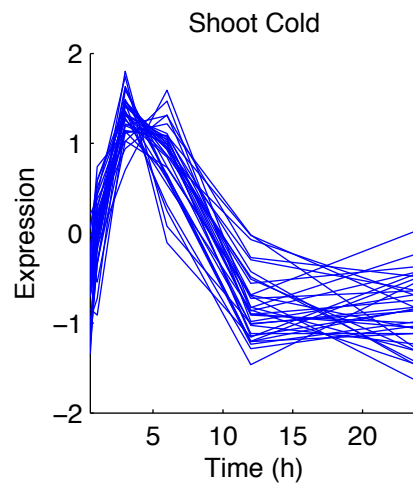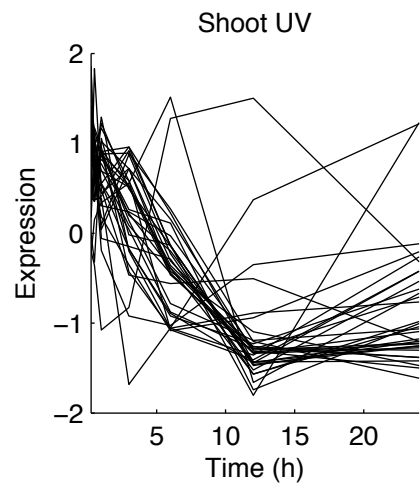

## Module47 – 1,3,5

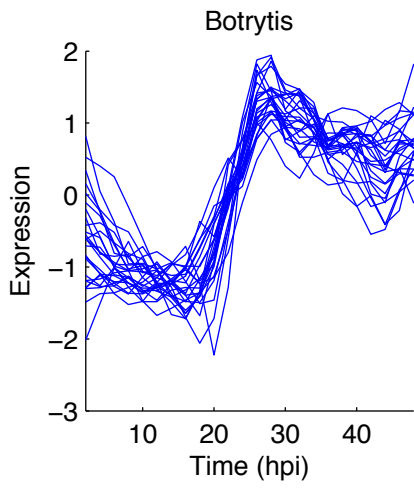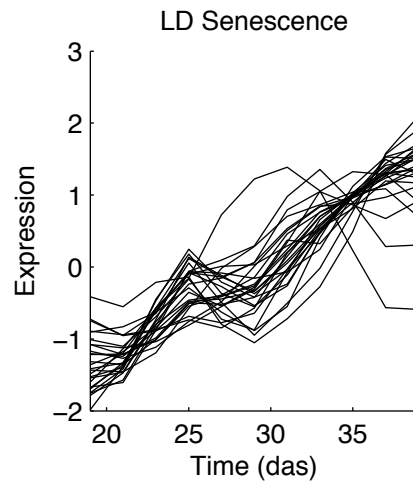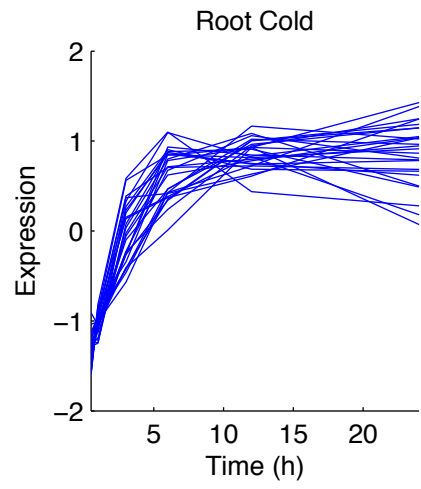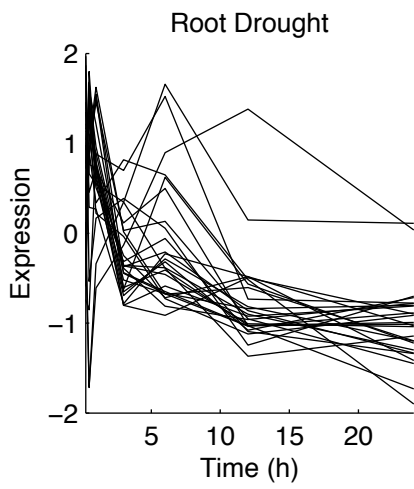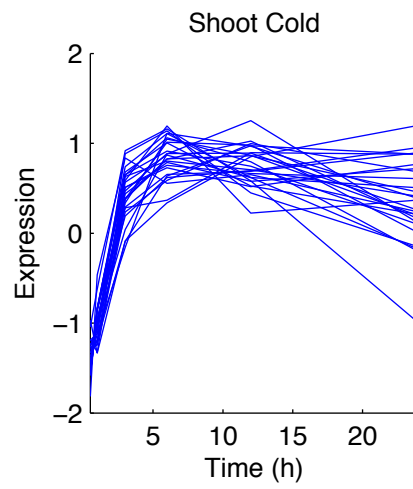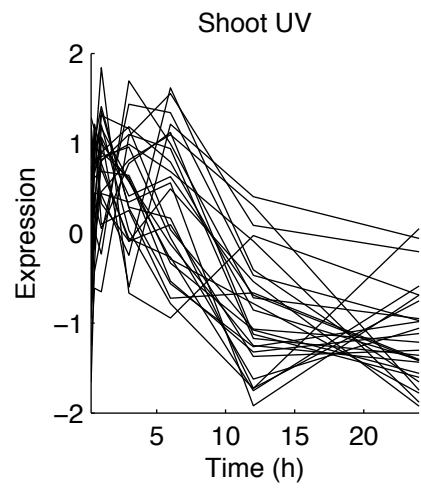



## Module48 – 5,6

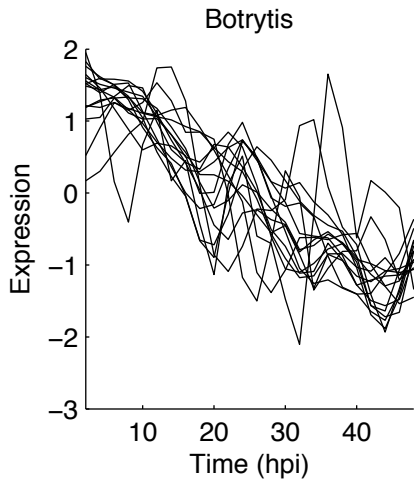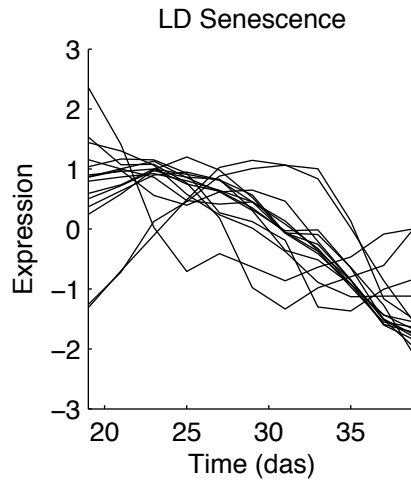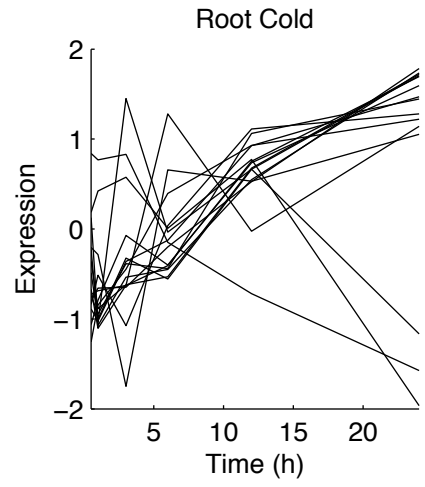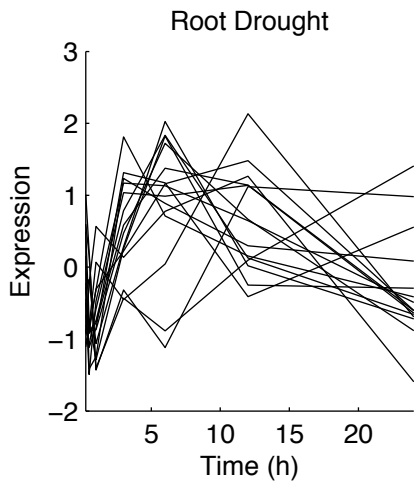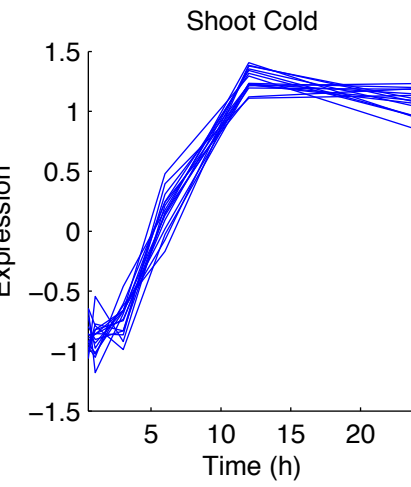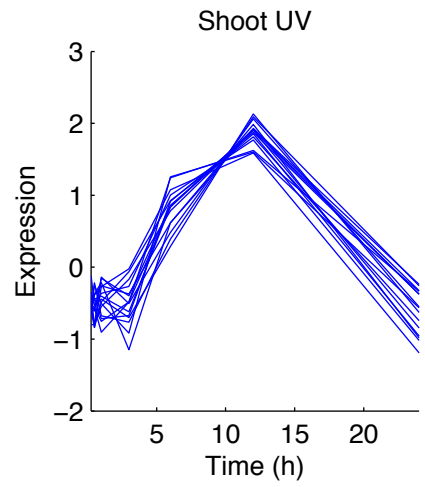

## Module49 – 2,4,5,6

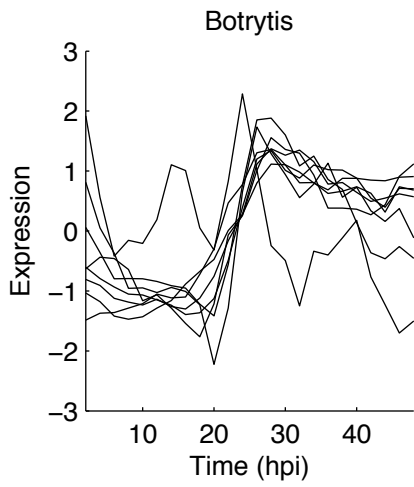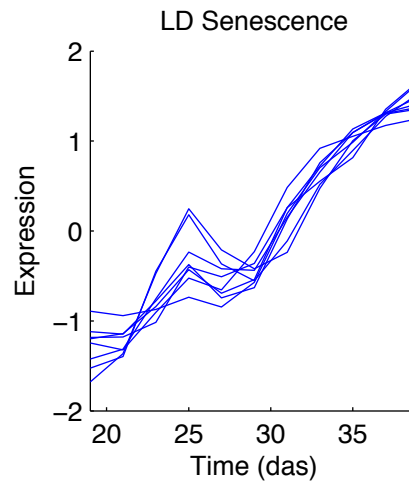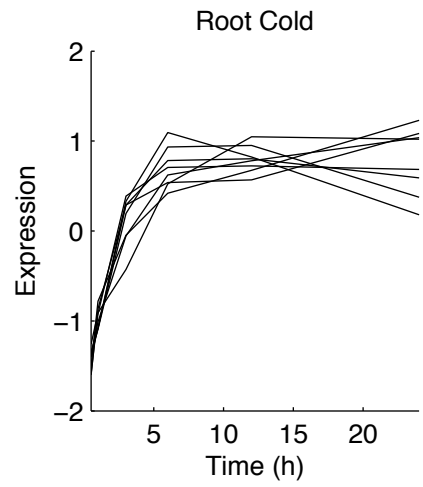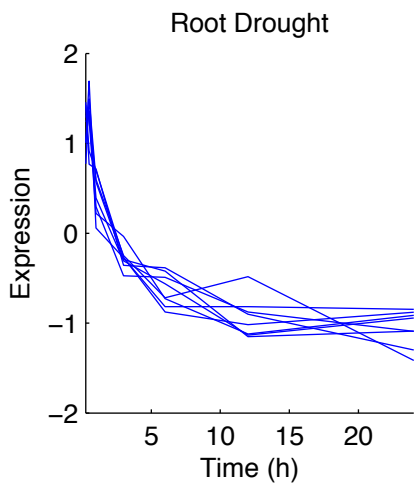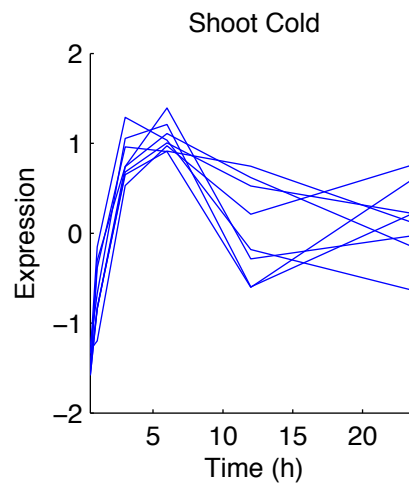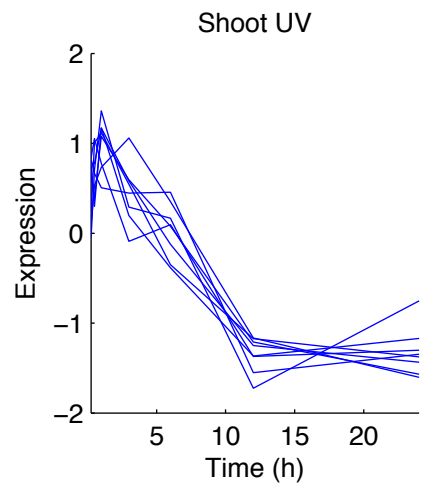

## Module50 – 2,4,5

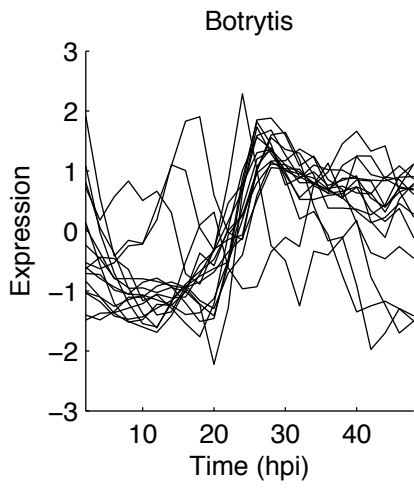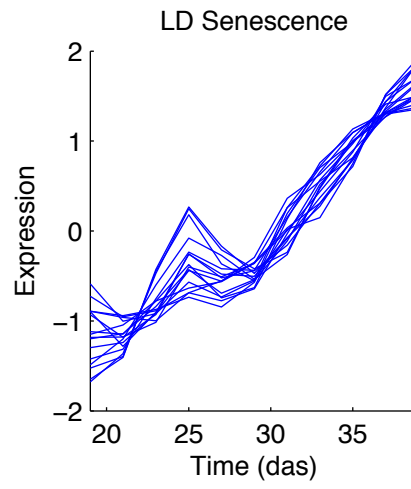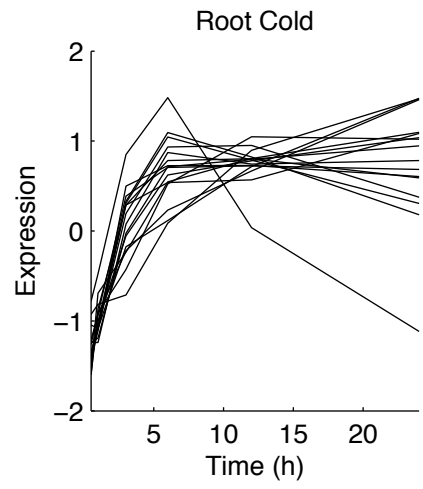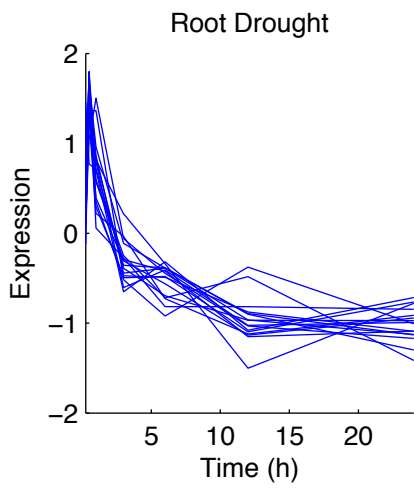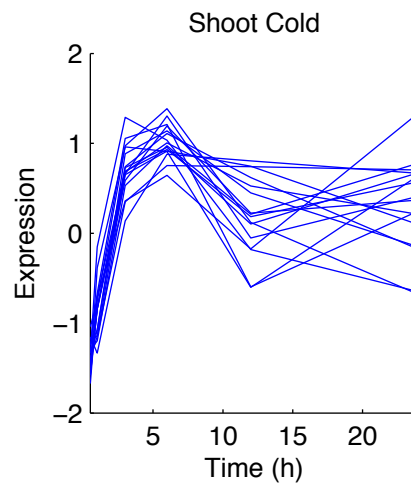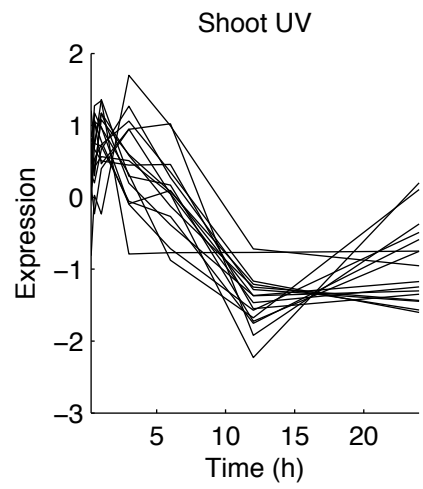

## Module51 – 1,2,5

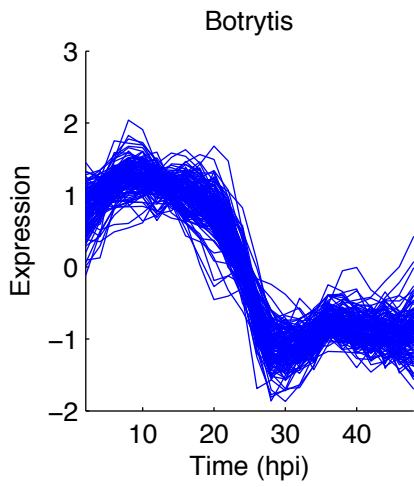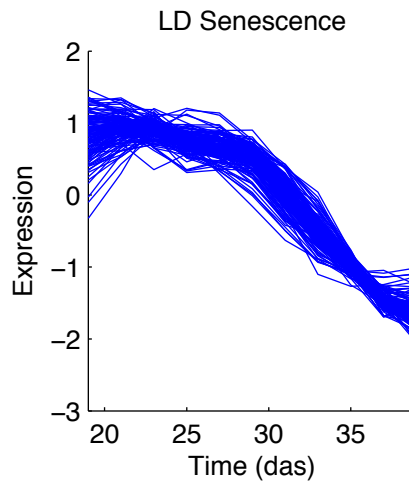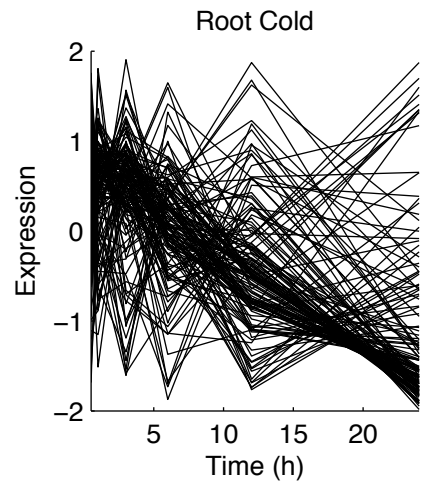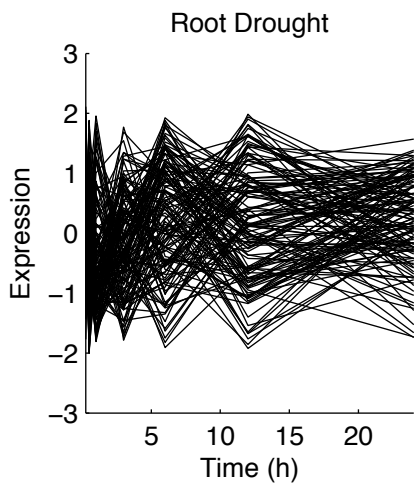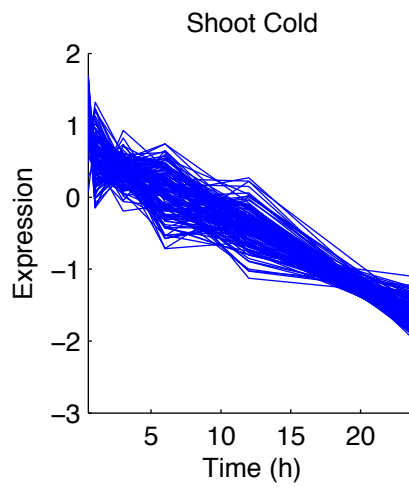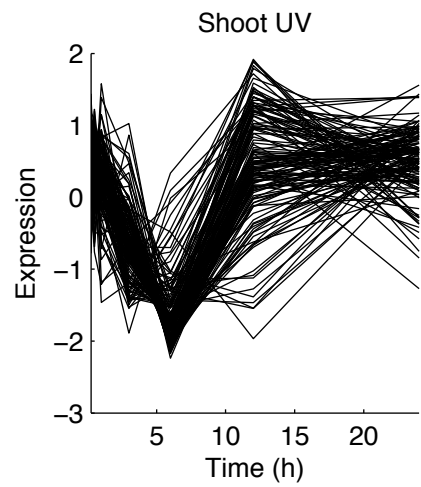

## Module52 – 3,4

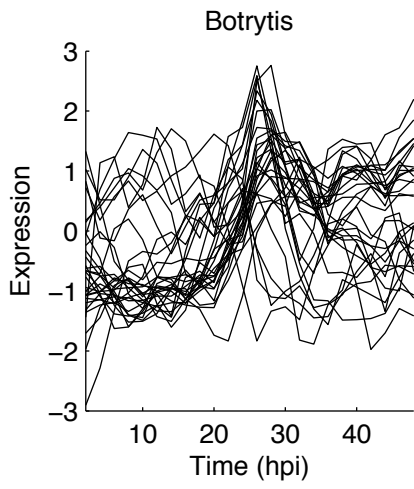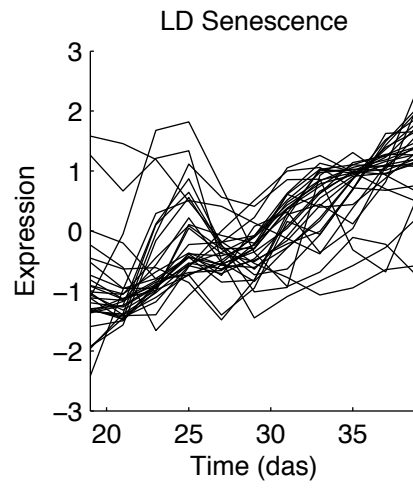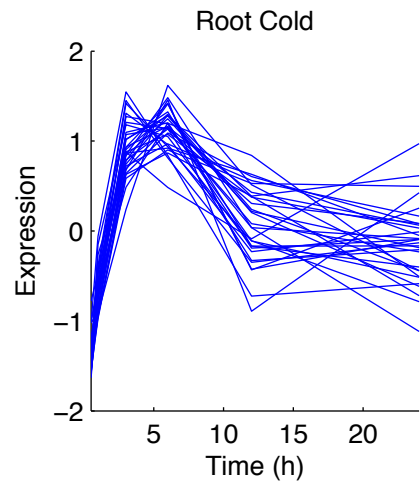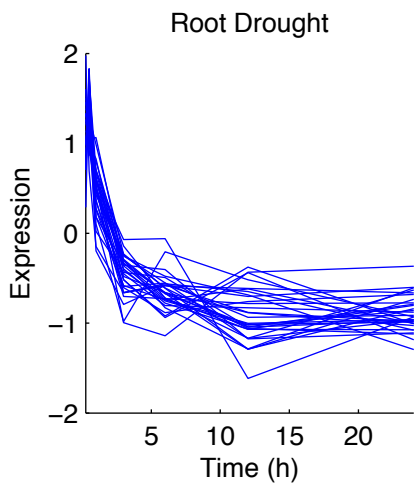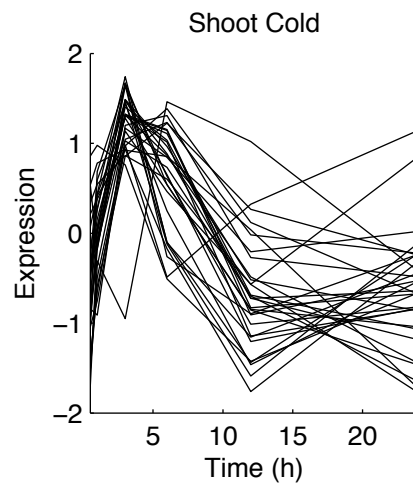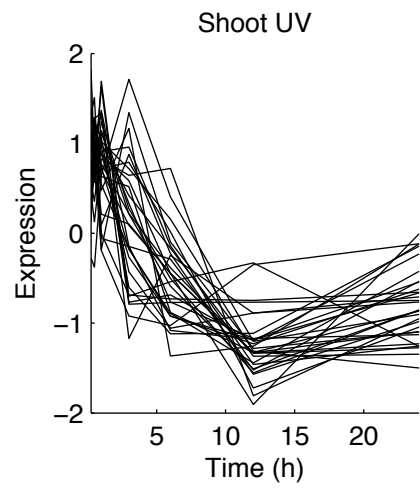

## Module53 – 1,2,6

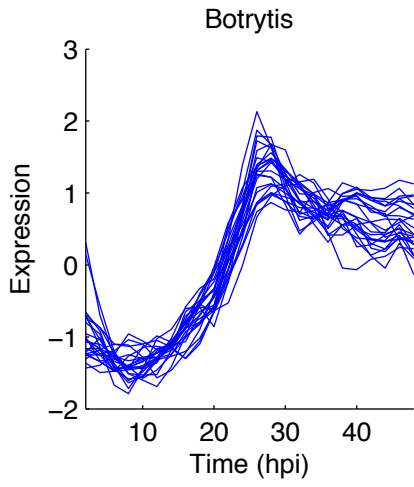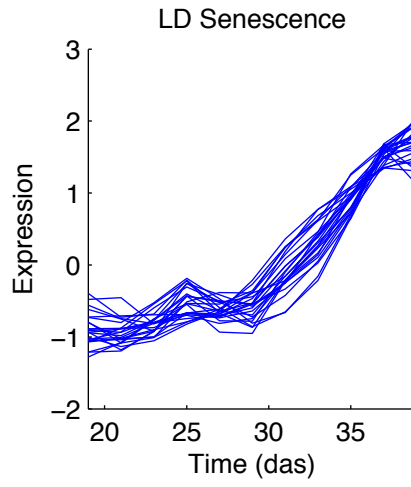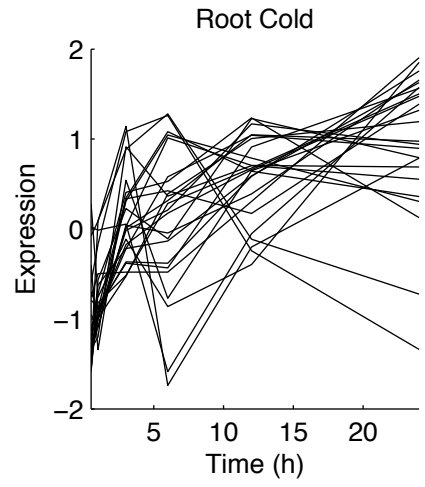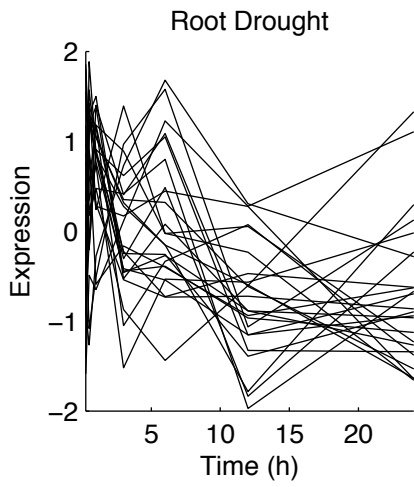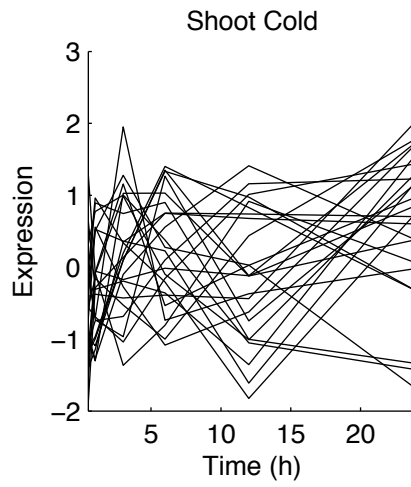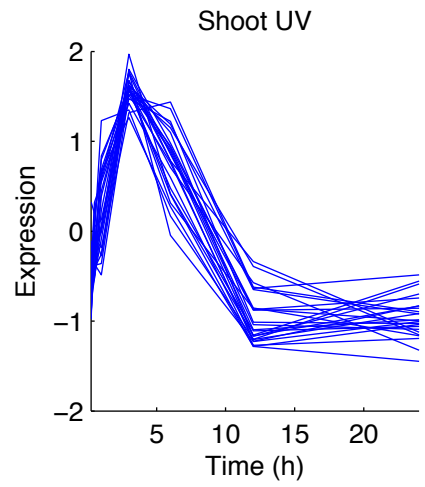

## Module54 – 2,3

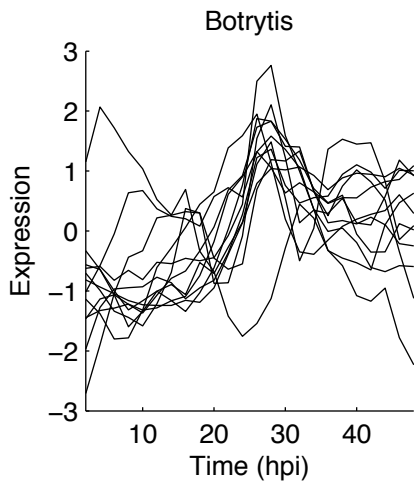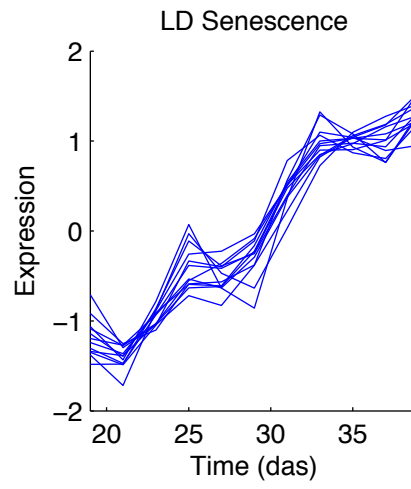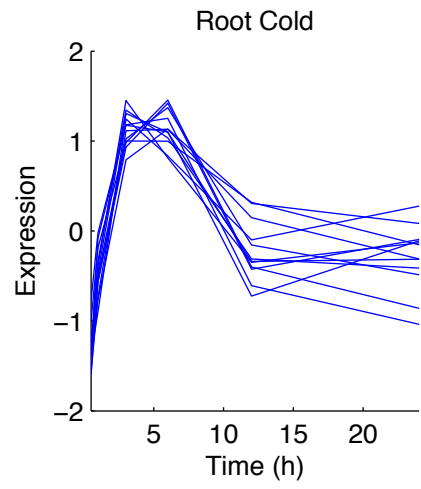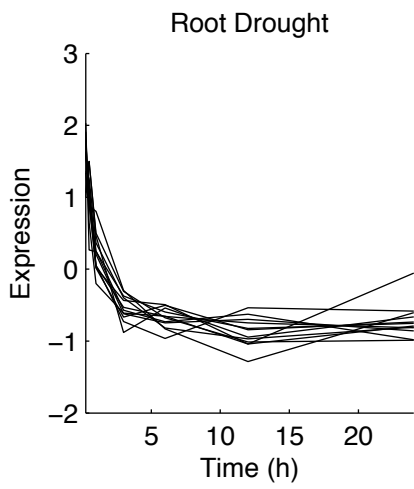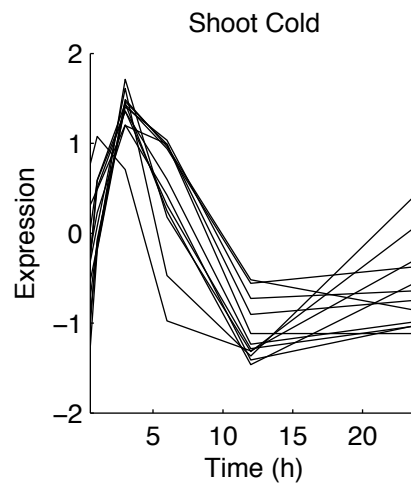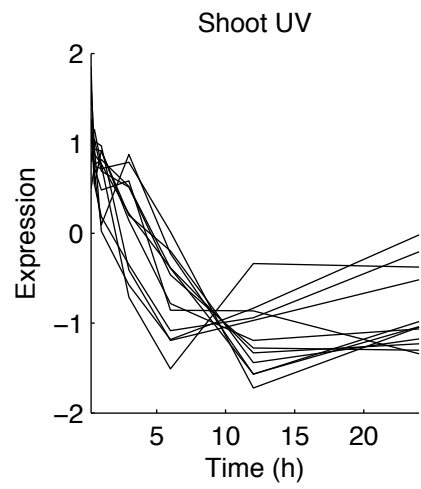

## Module55 – 1,3,4,6

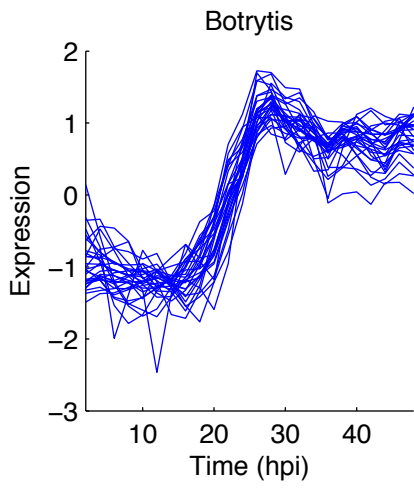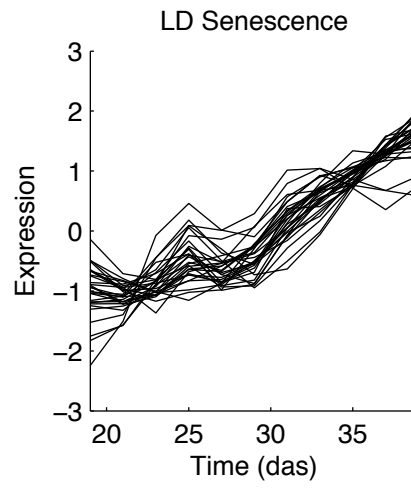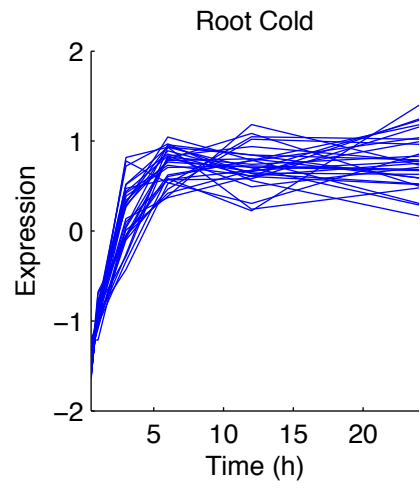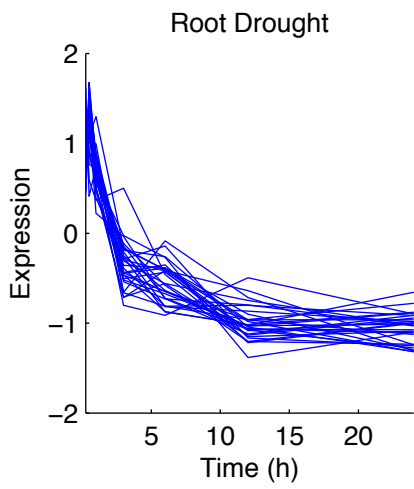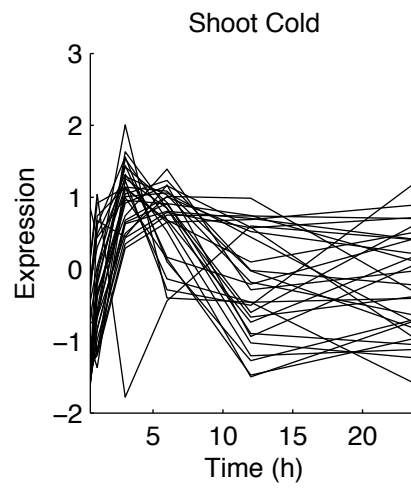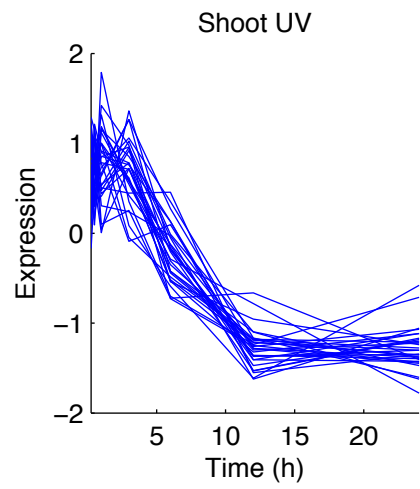



## Module56 – 1,2,6

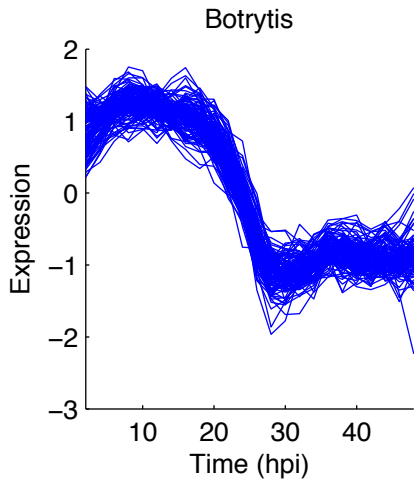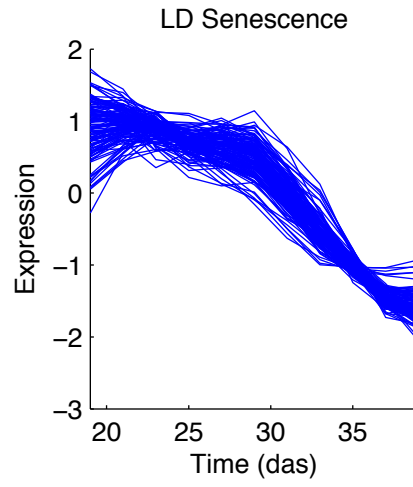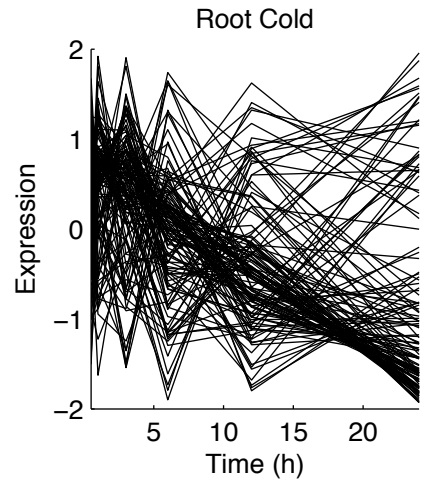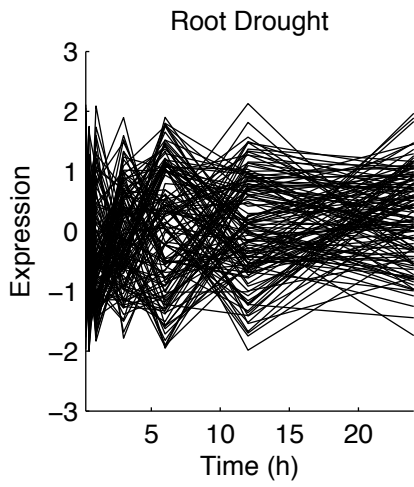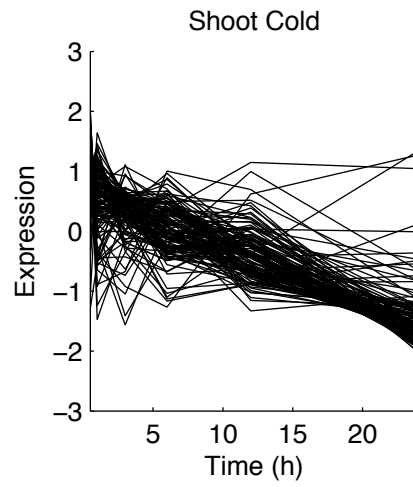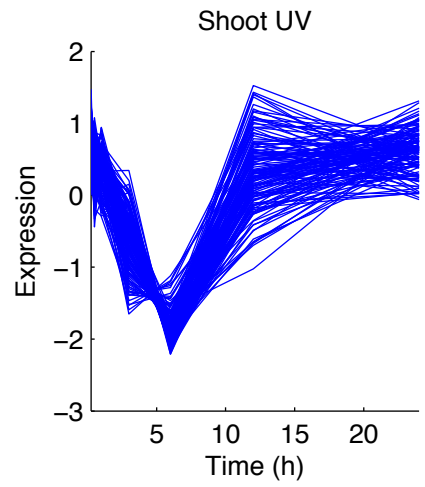

## Module57 – 3,5

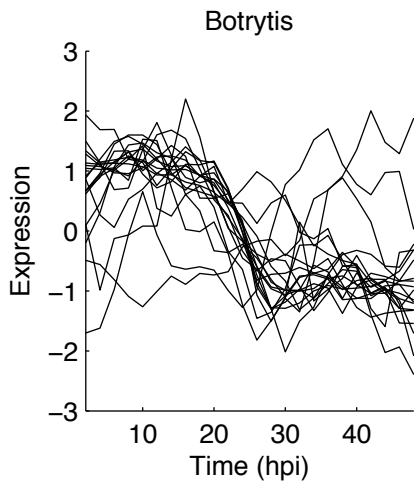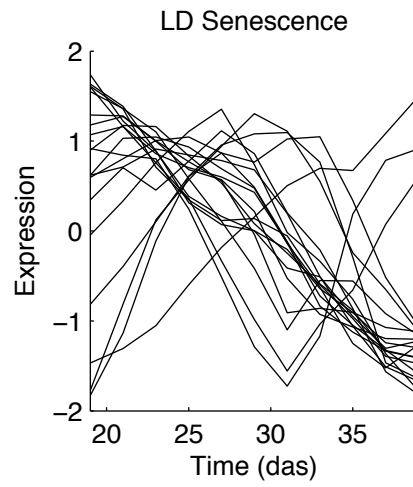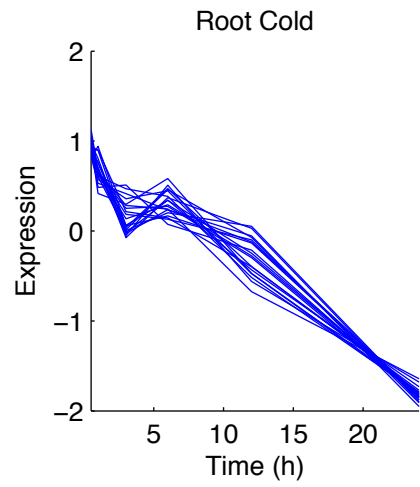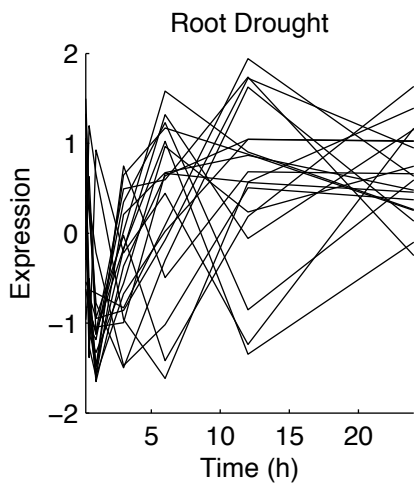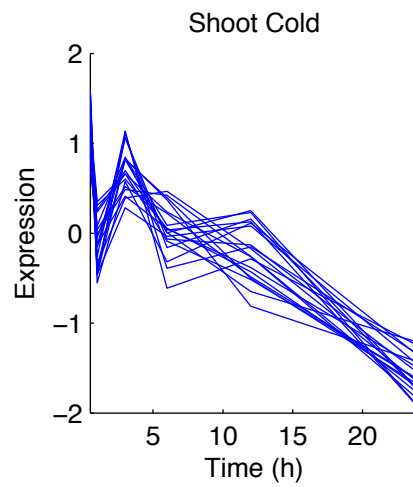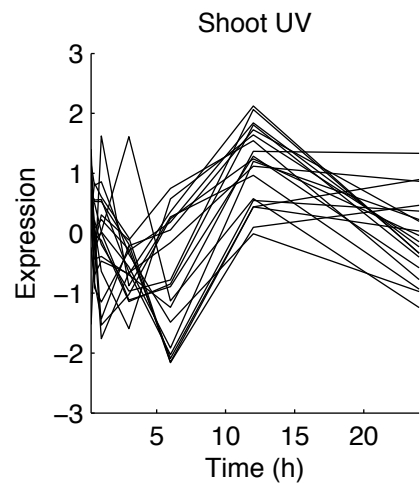

## Module58 – 1,3,5,6

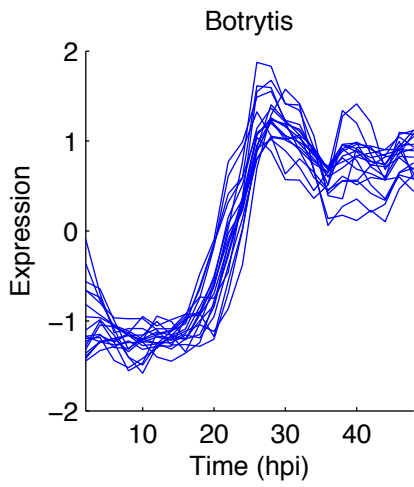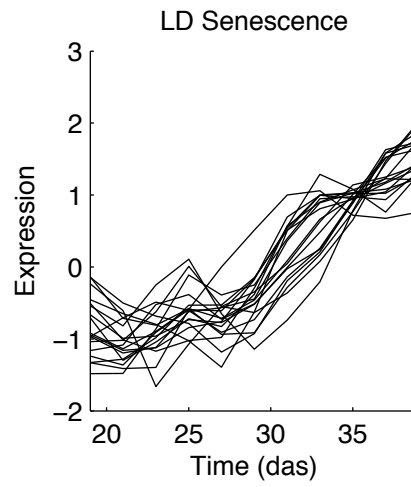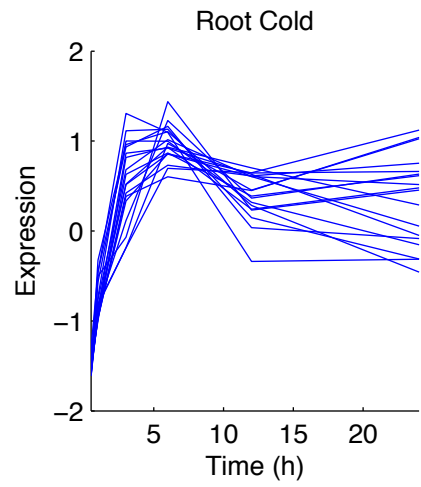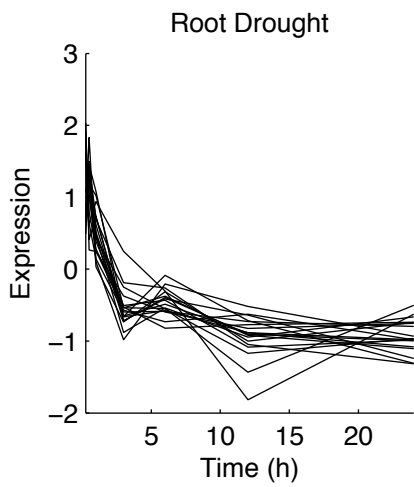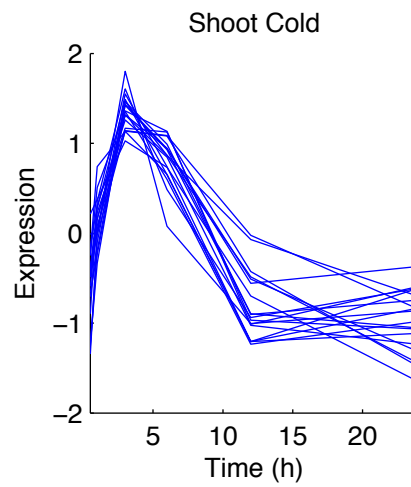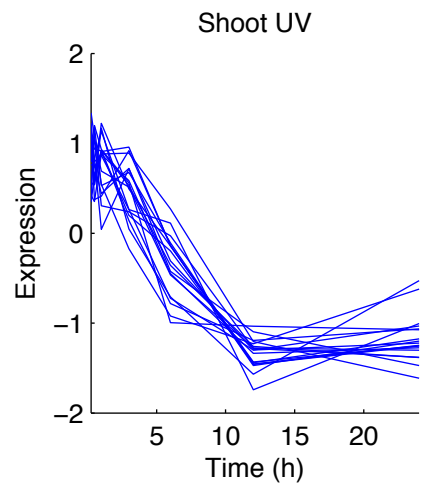

## Module59 – 3,4,5

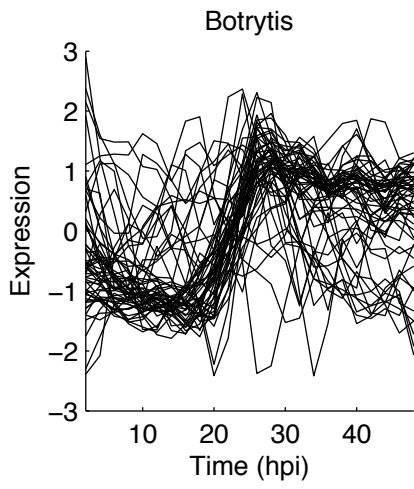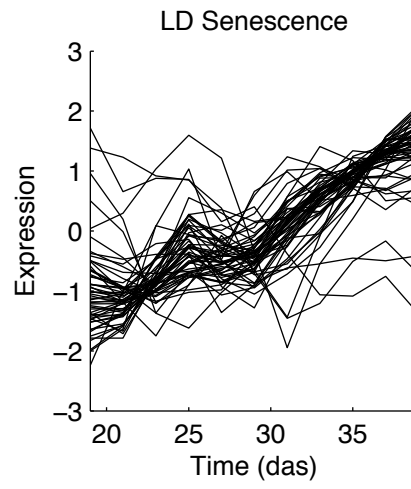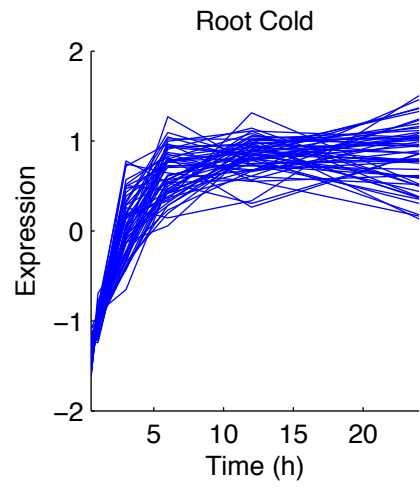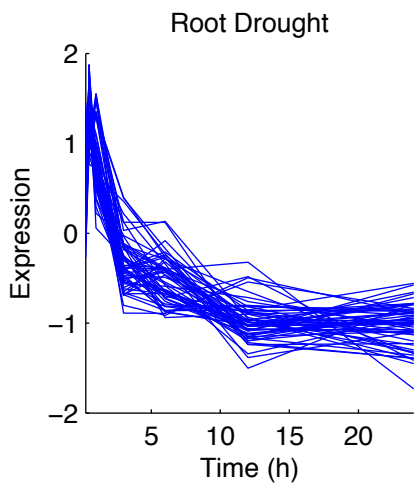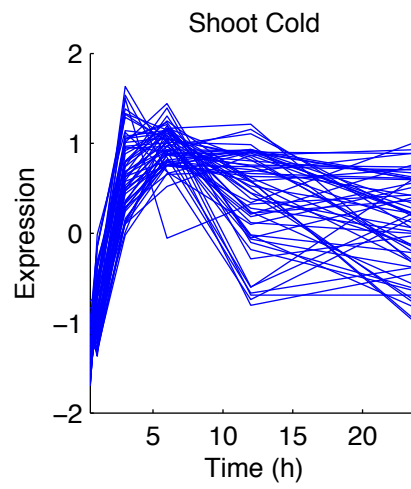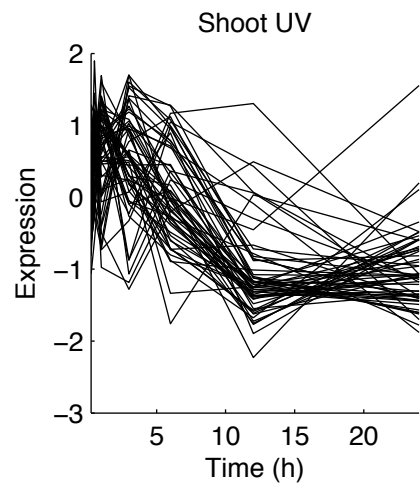

## Module60 – 1,6

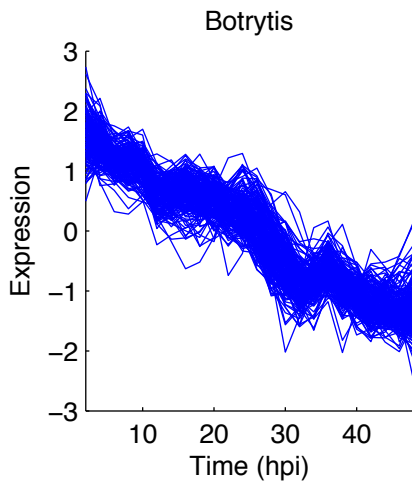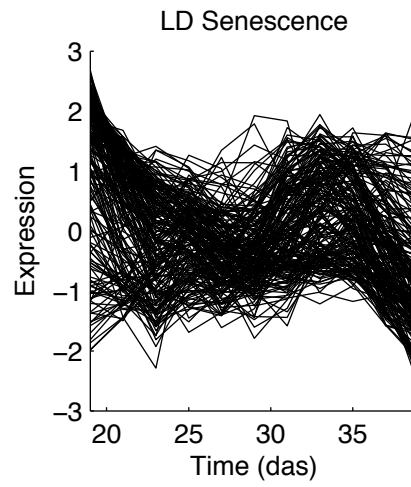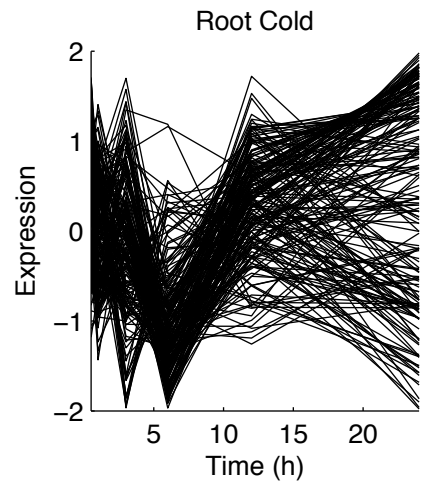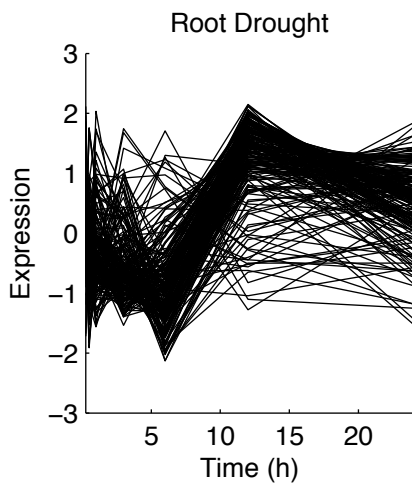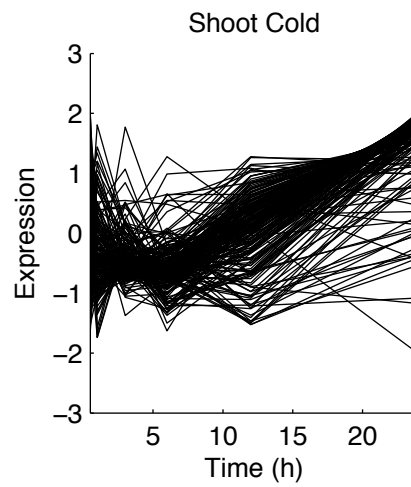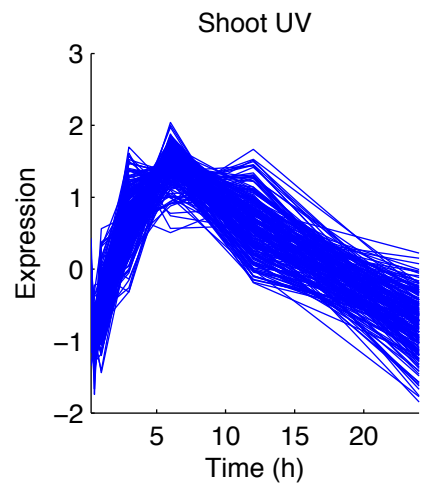

## Module61 – 1,3

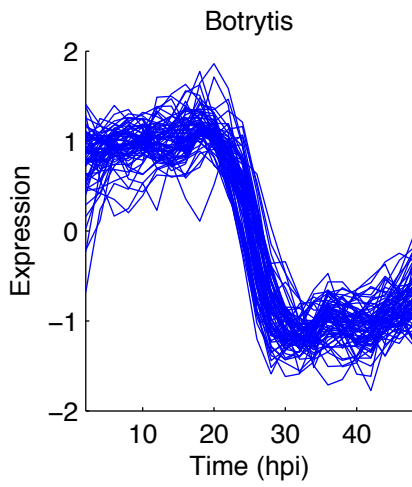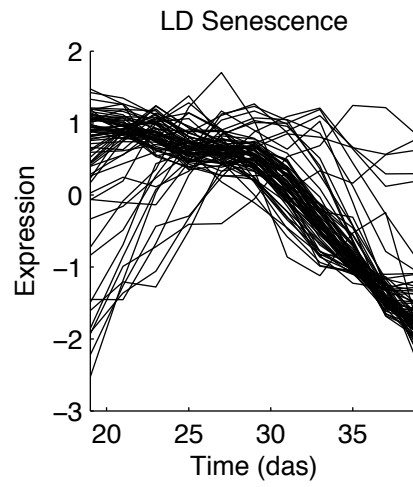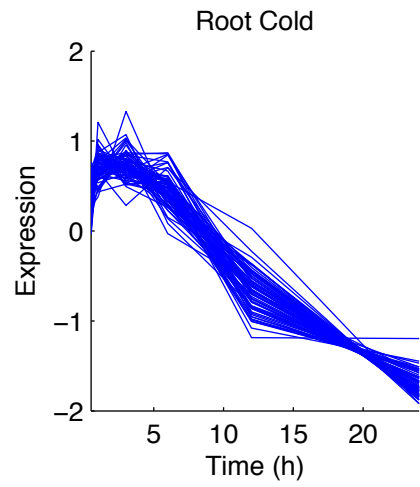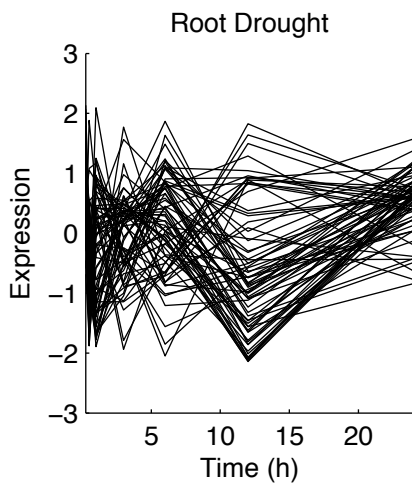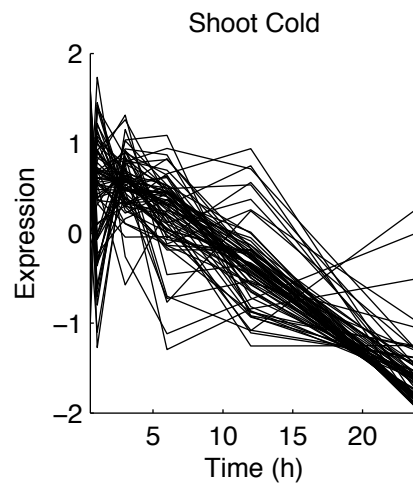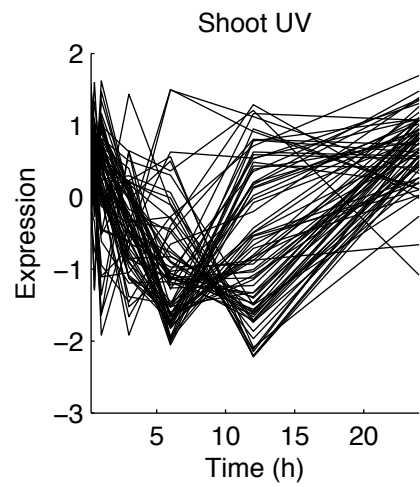

## Module62 – 5,6

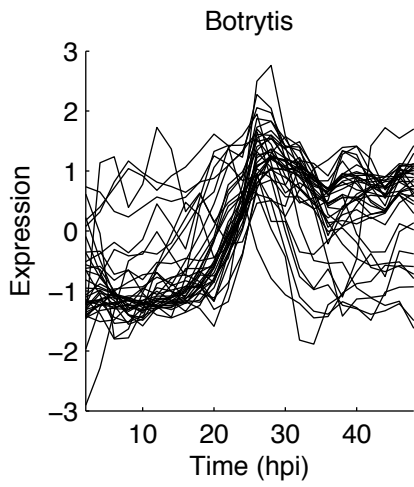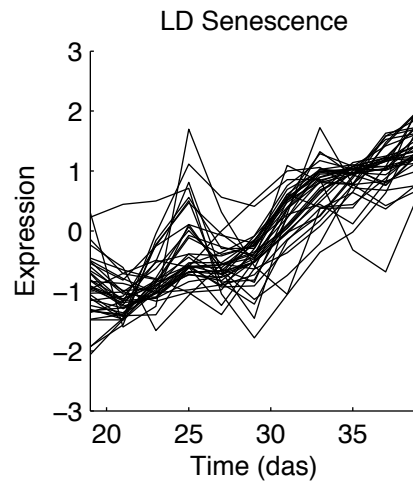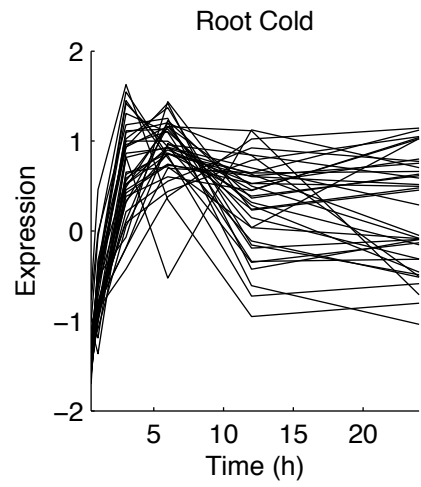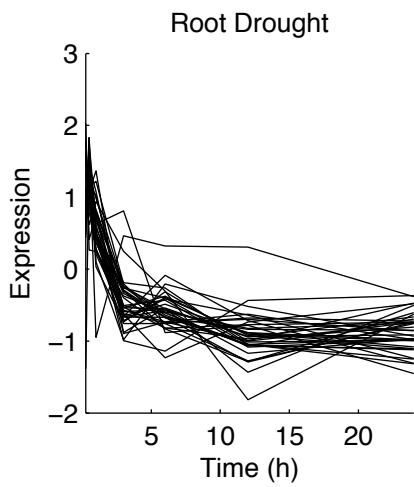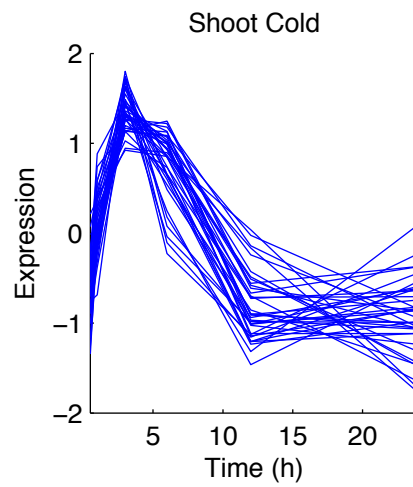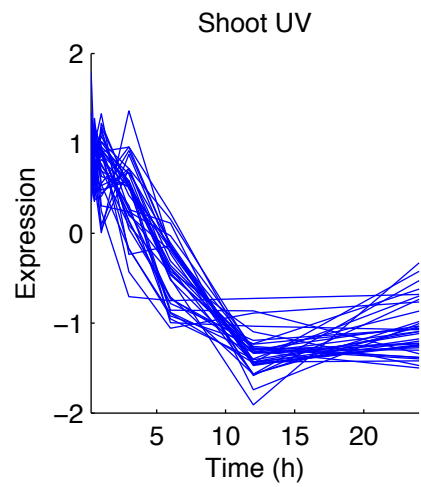

## Module63 – 1,5

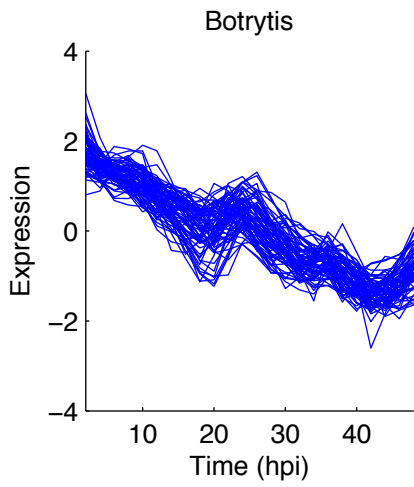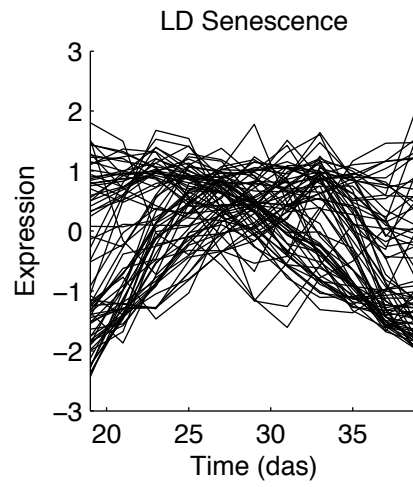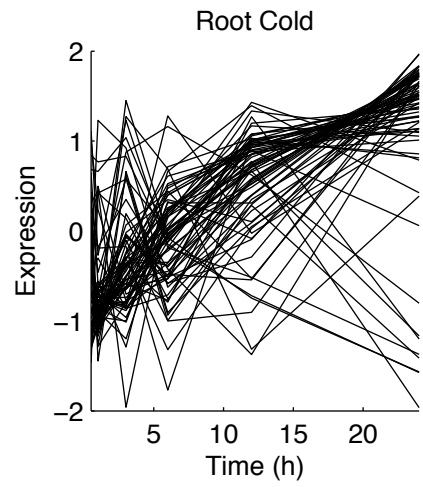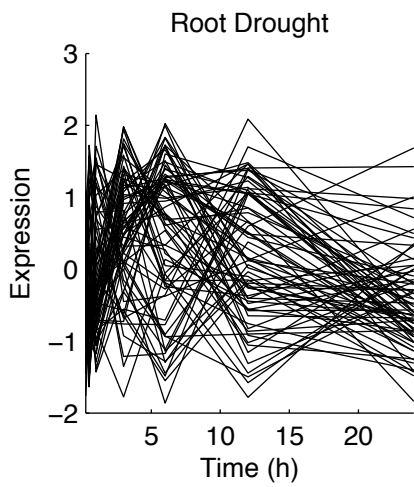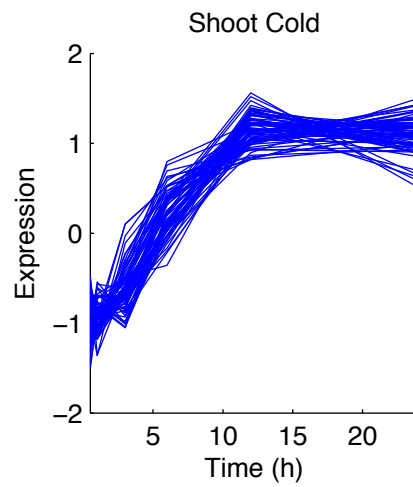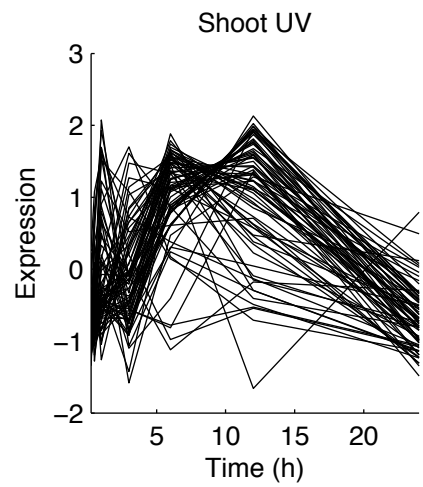



## Module64 – 1,3

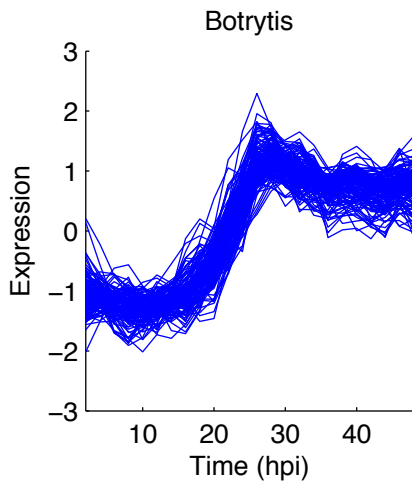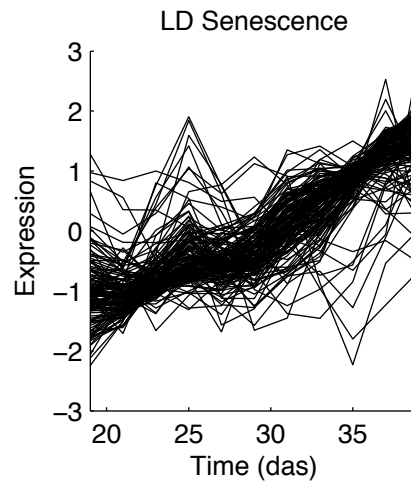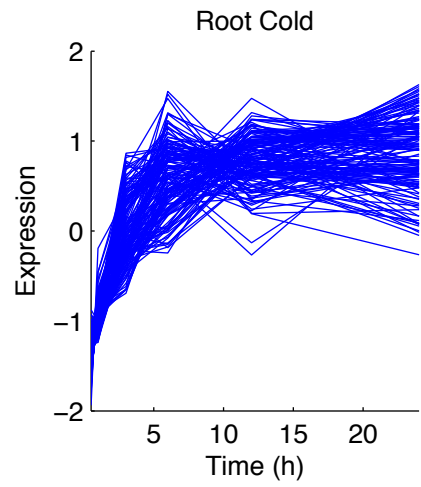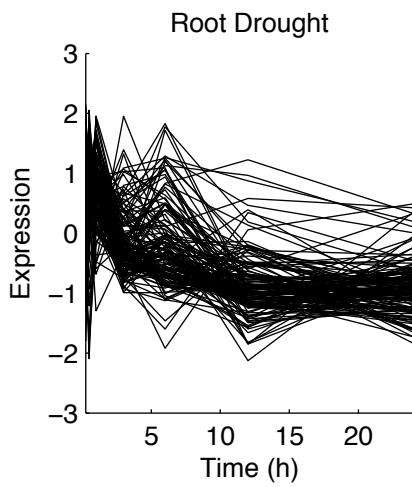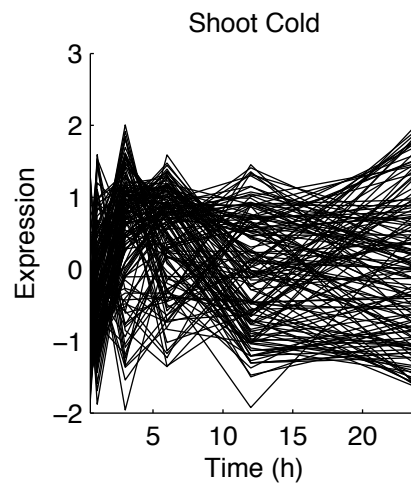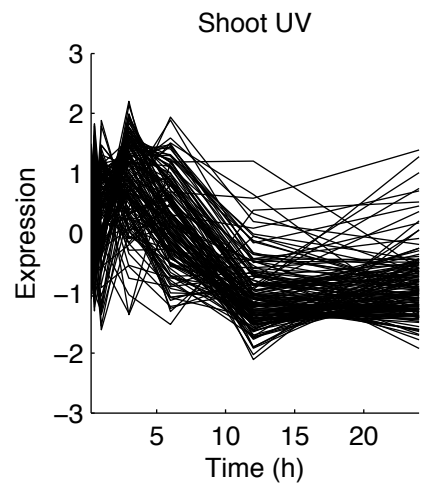

## Module65 – 1,6

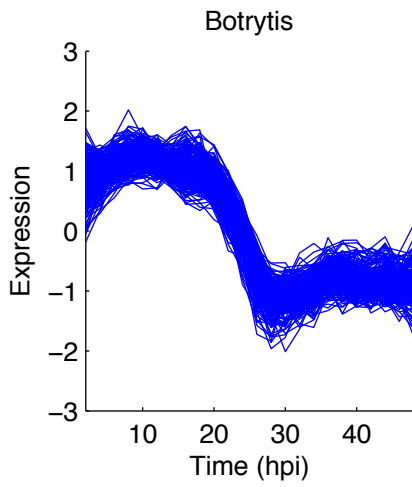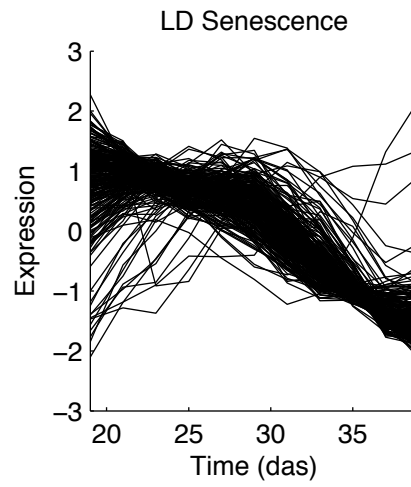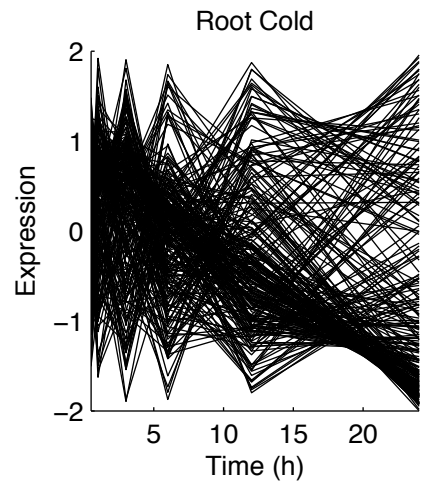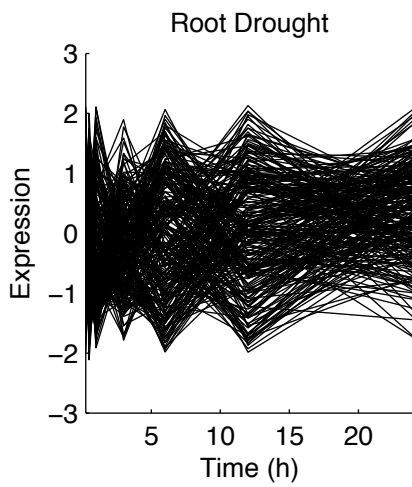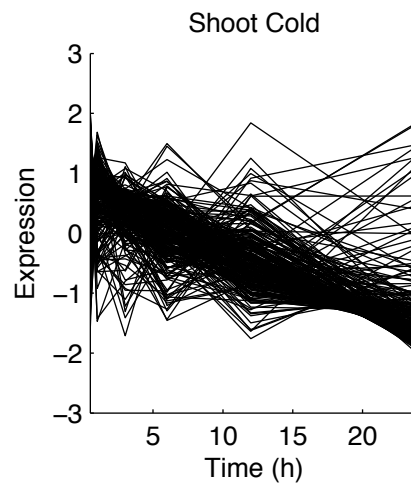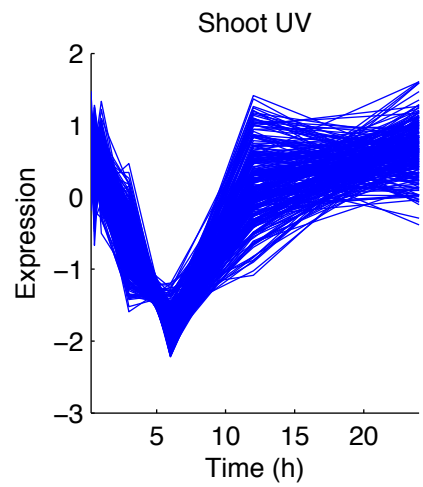

## Module66 – 1,4,5,6

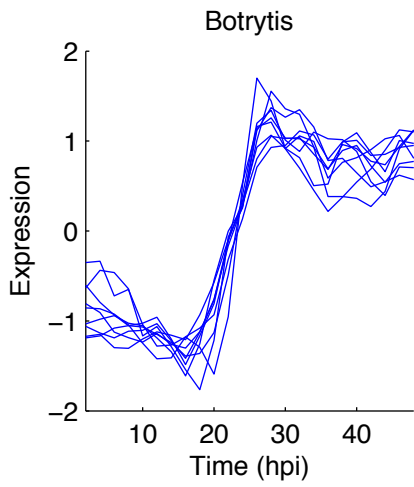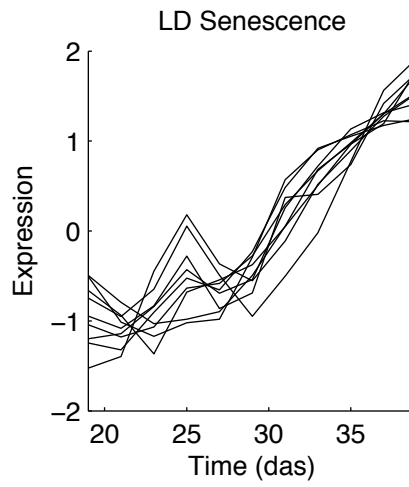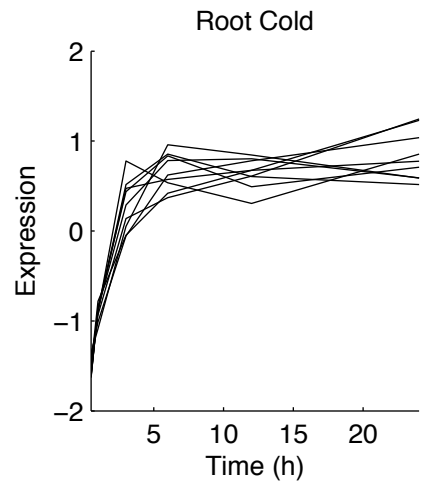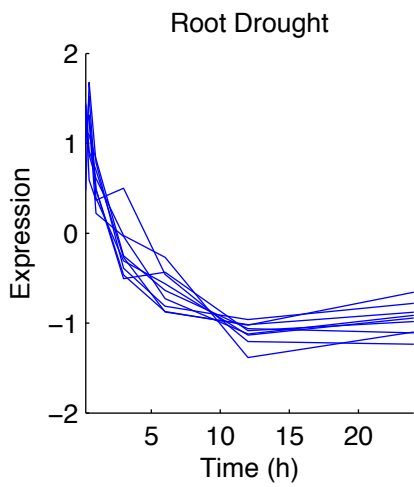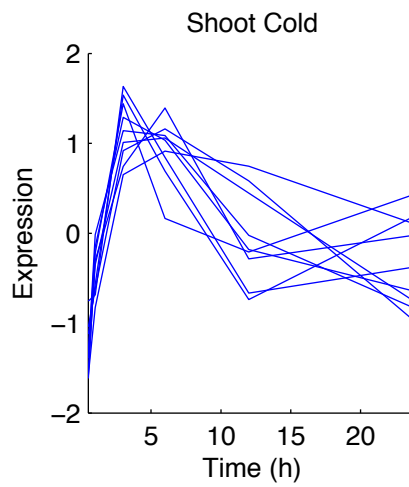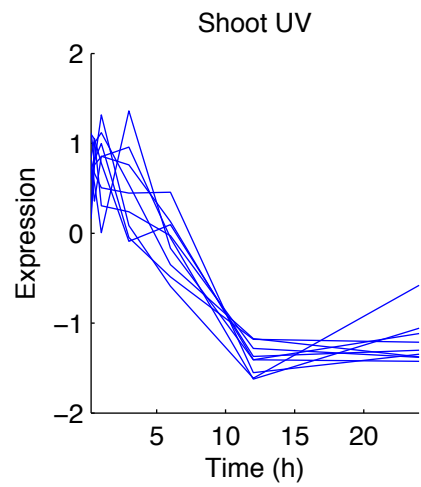

## Module67 – 2,5

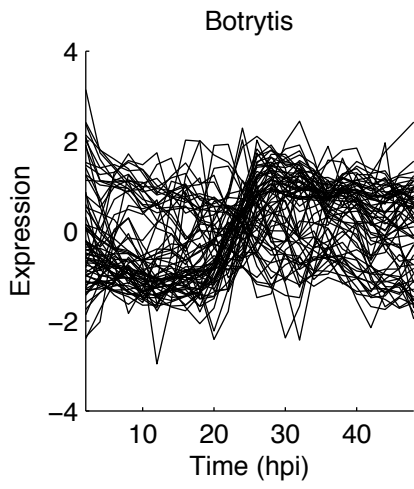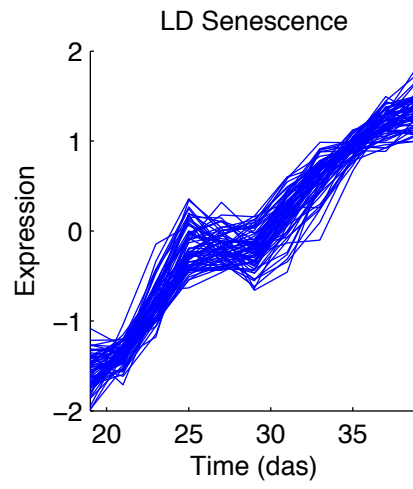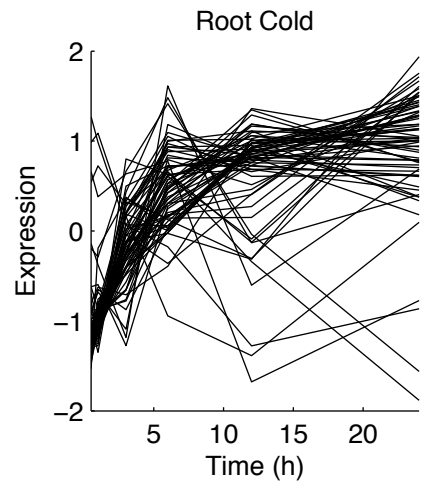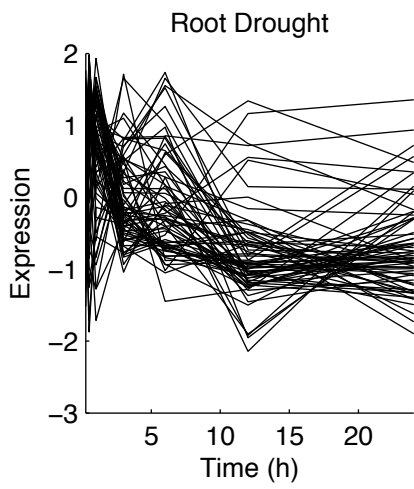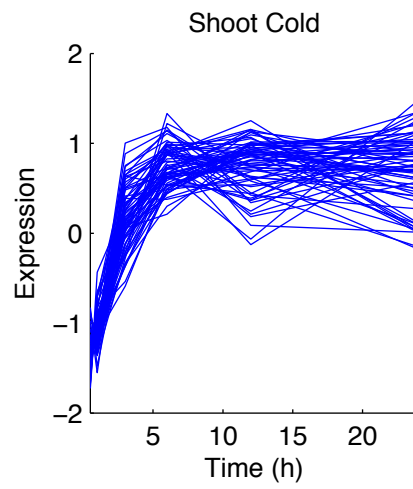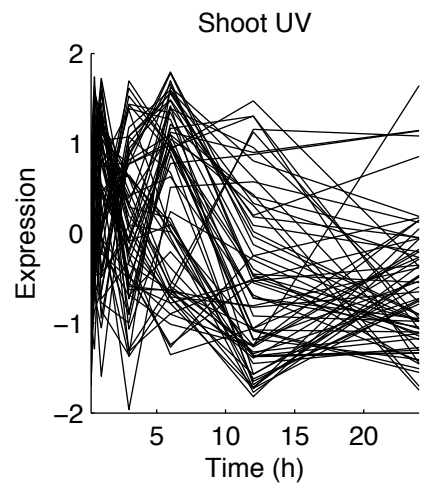

## Module68 – 1,2

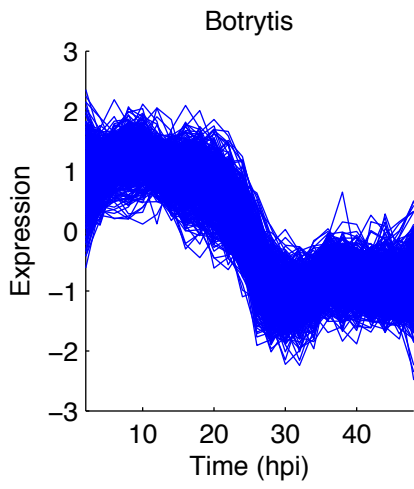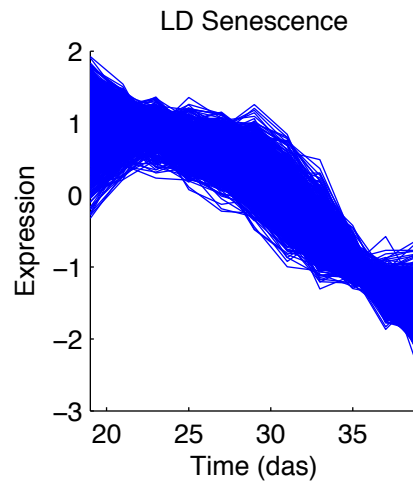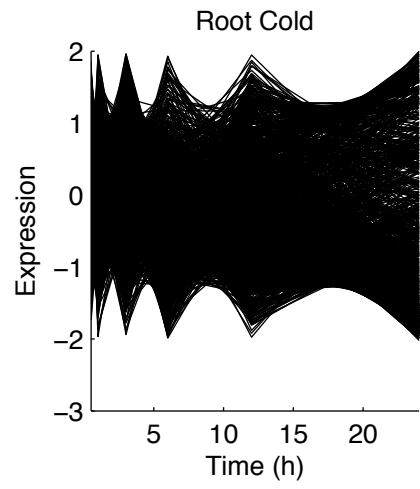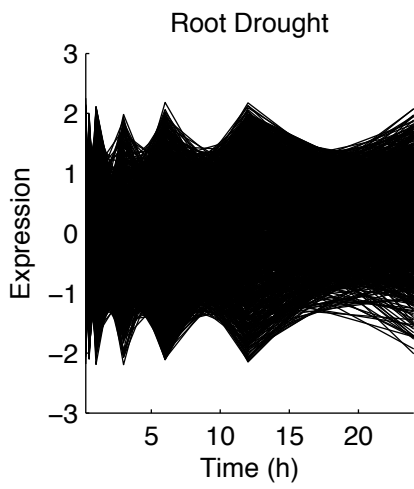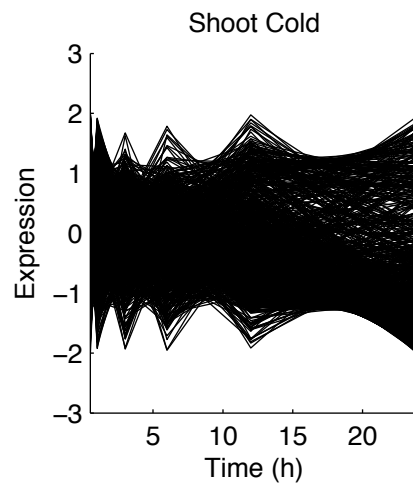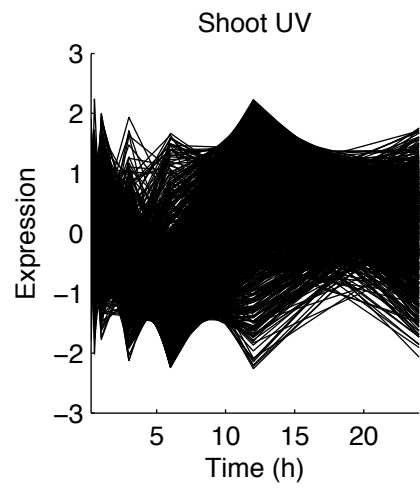

## Module69 – 1,2

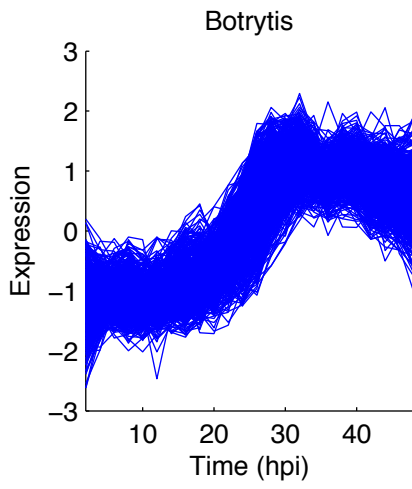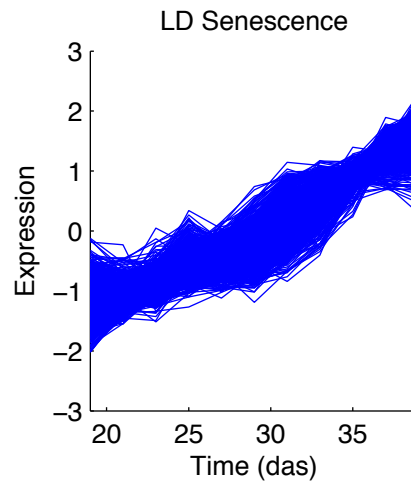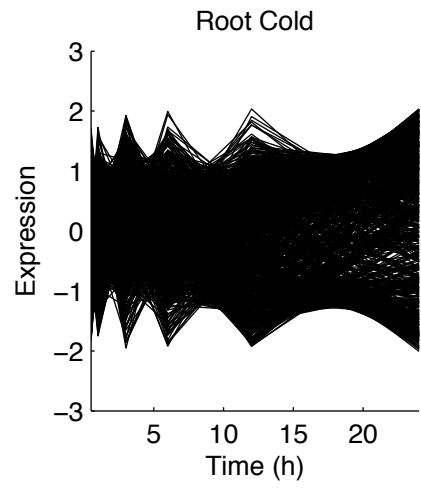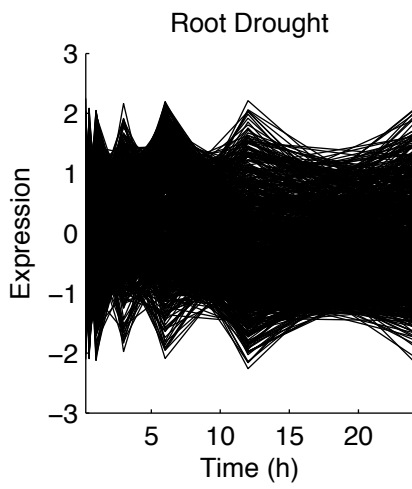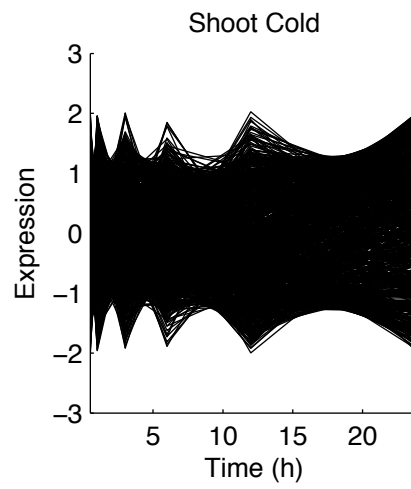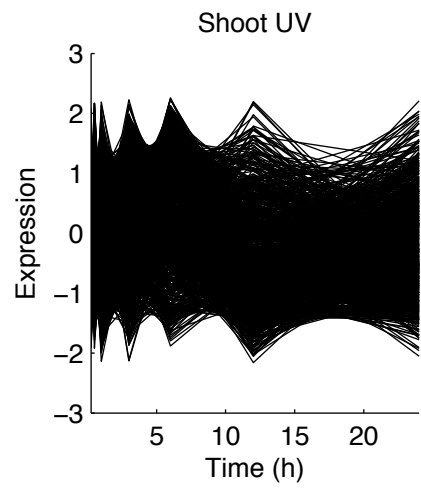

## Module70 – 3,5

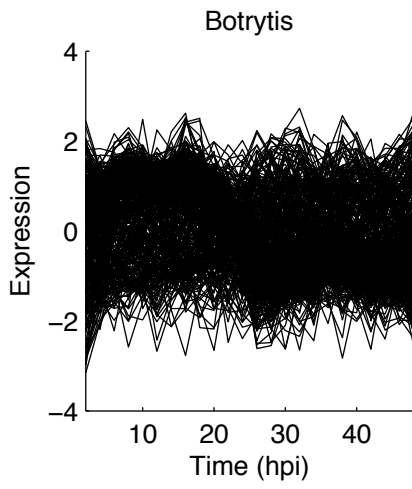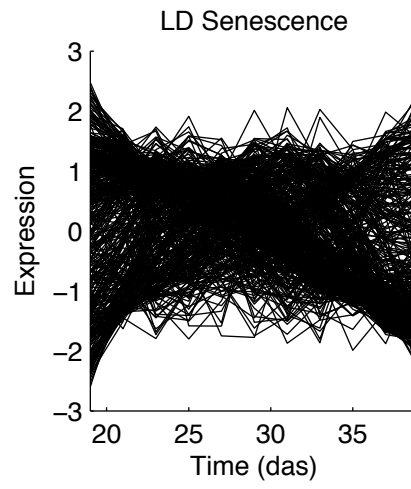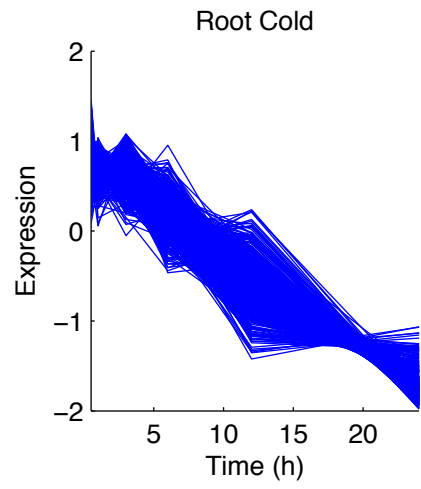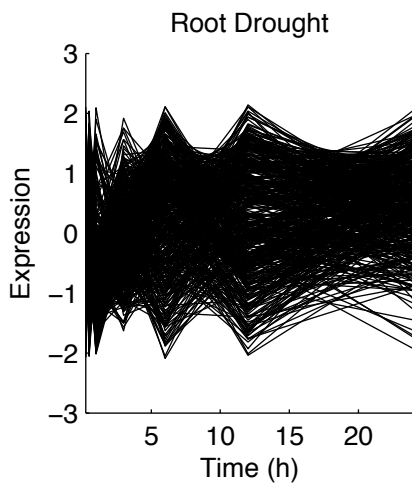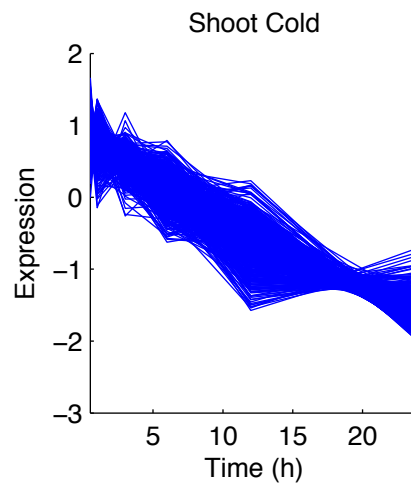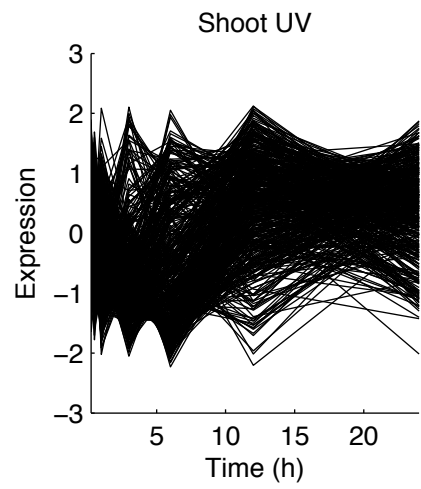

## Module71 – 3,5

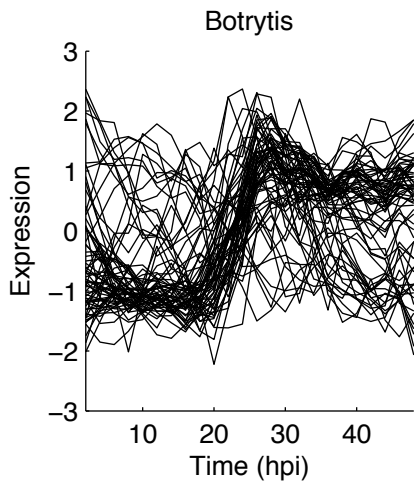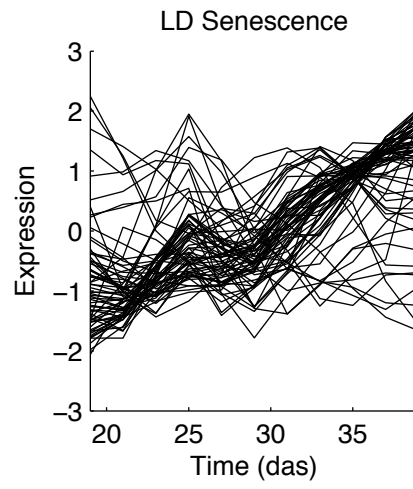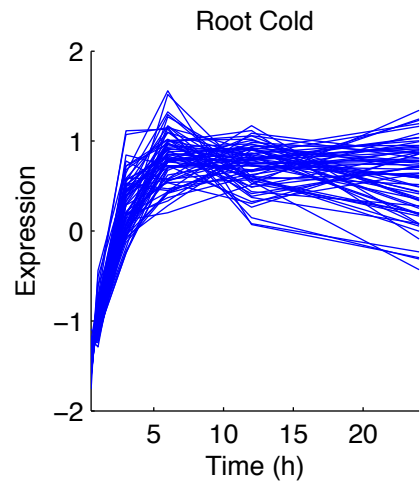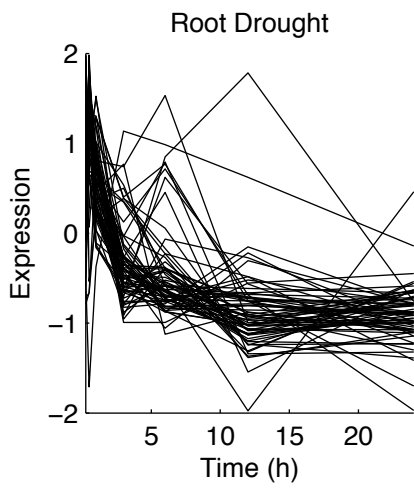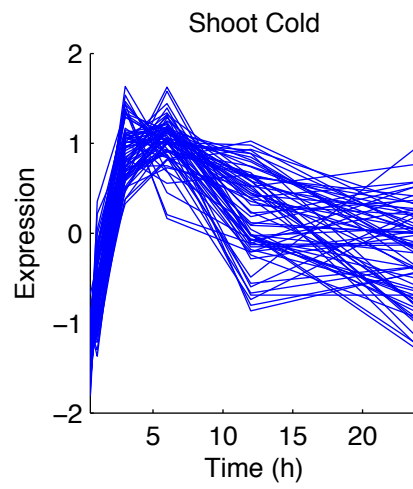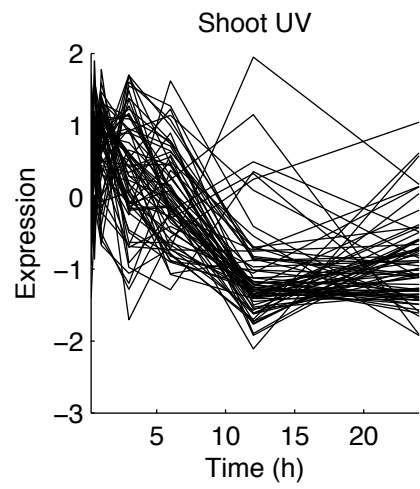



## Module72 – 3,4

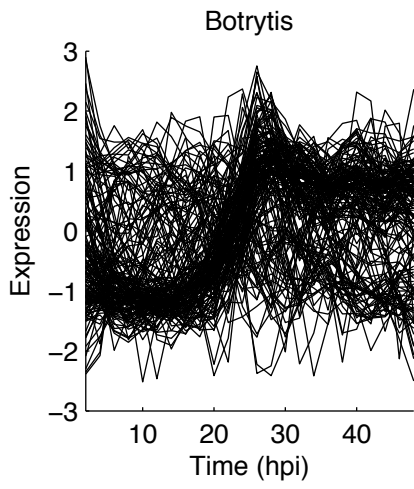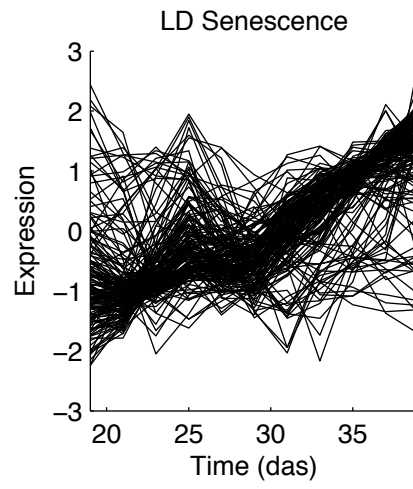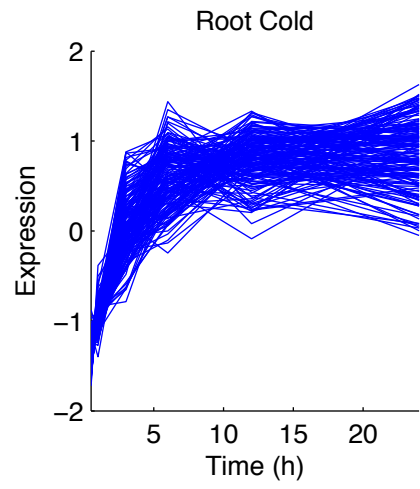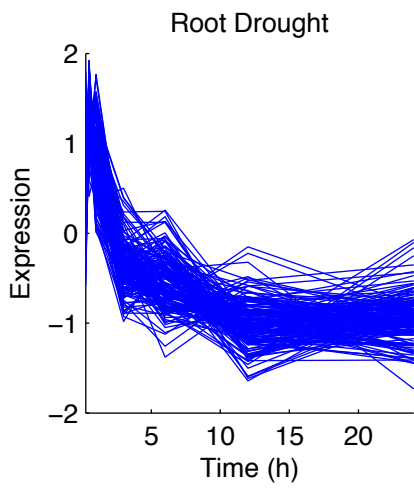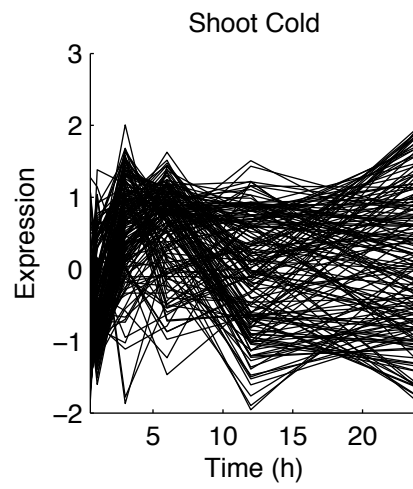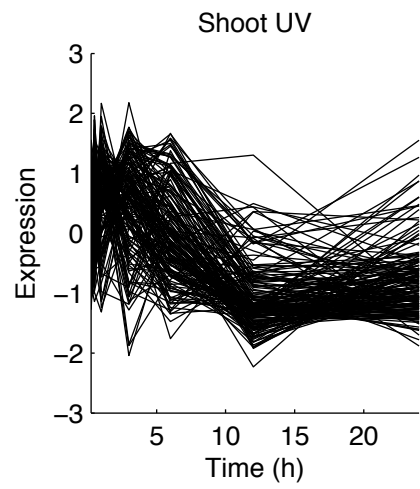

## Module73 – 2,3

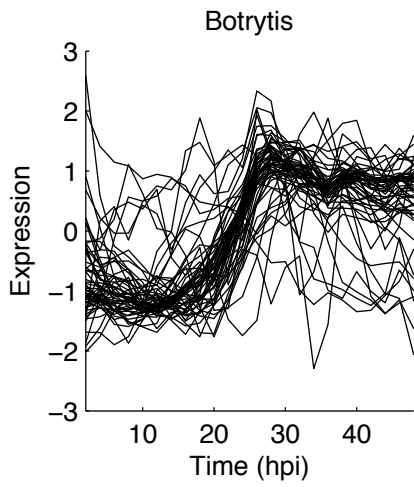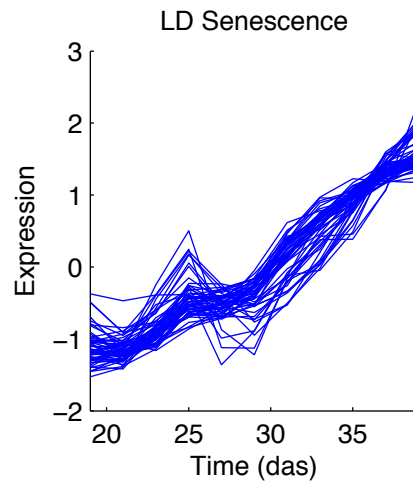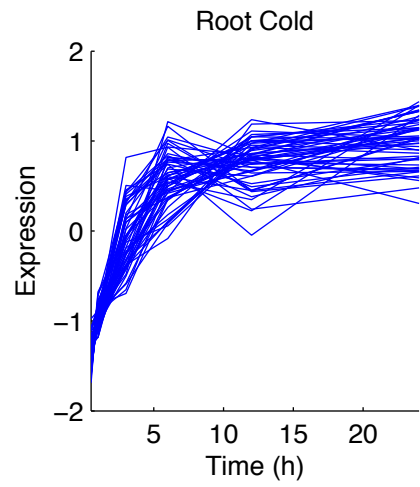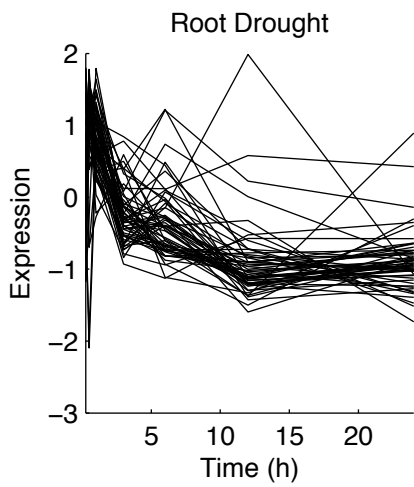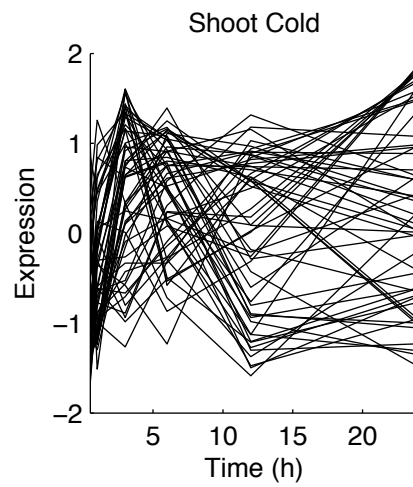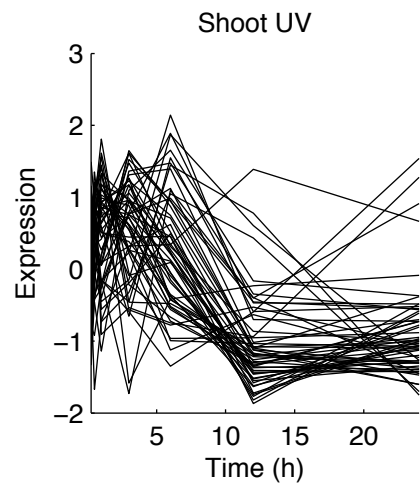

## Module74 – 1,5

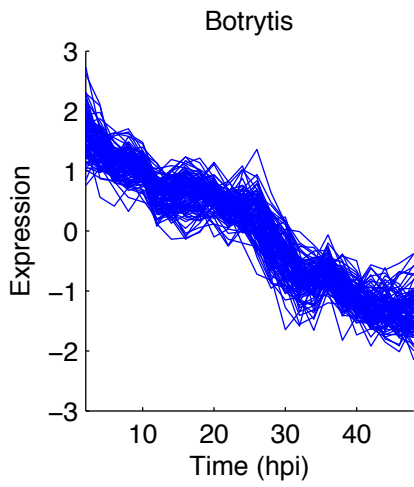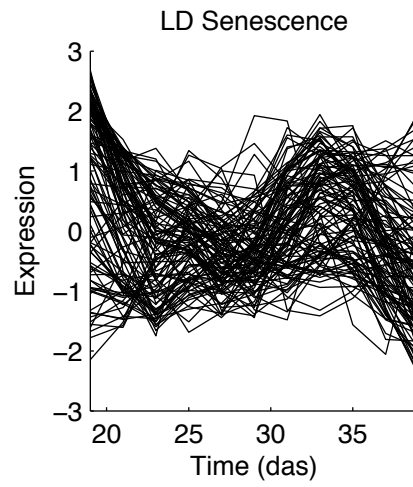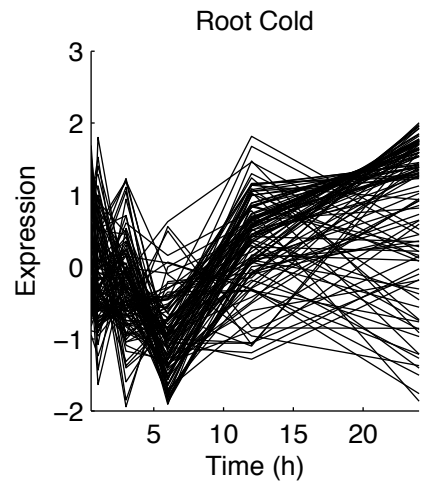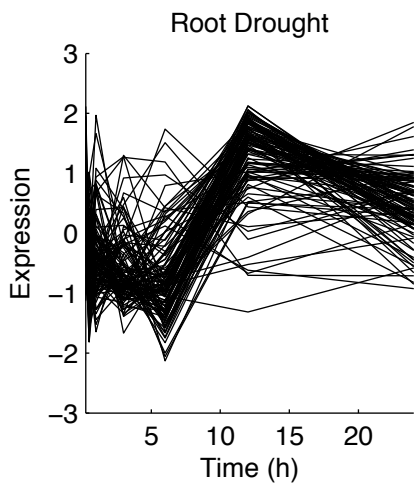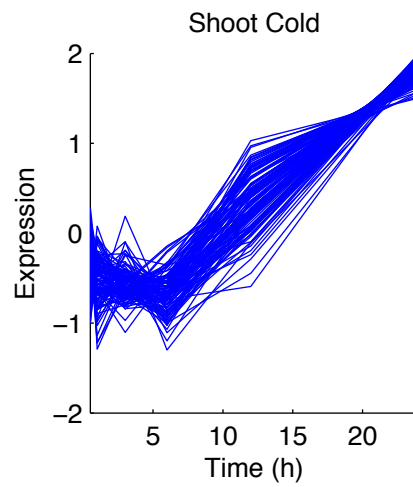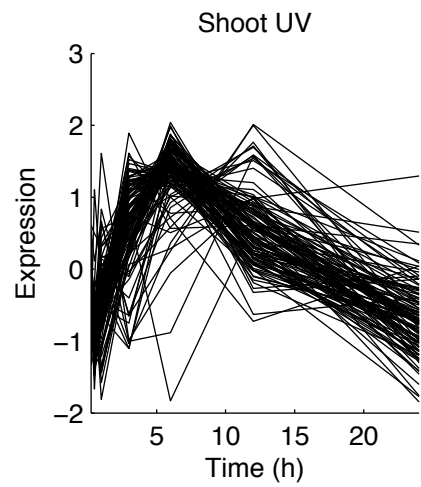

## Module75 – 1,3,6

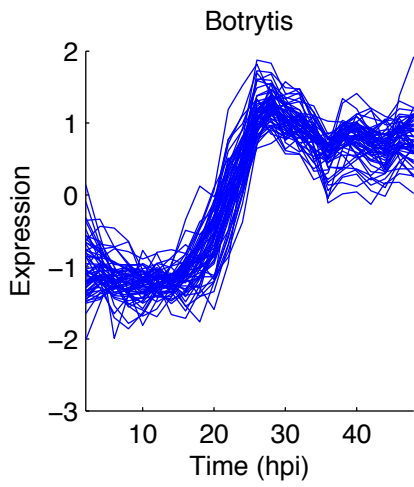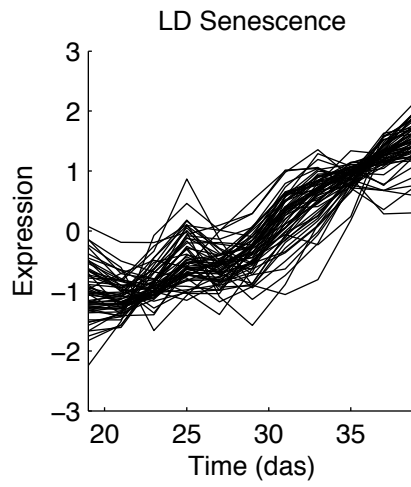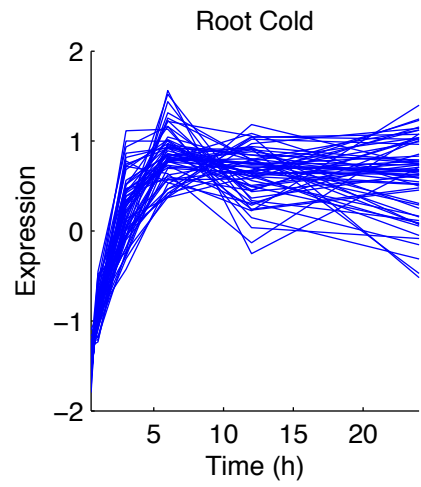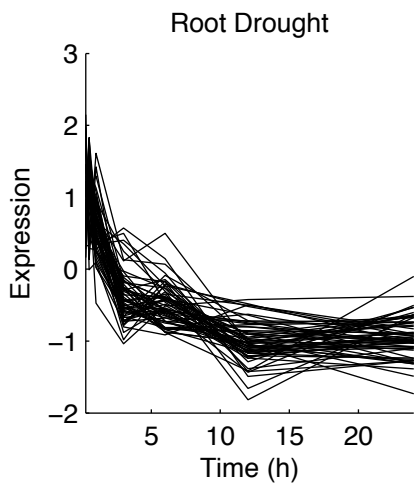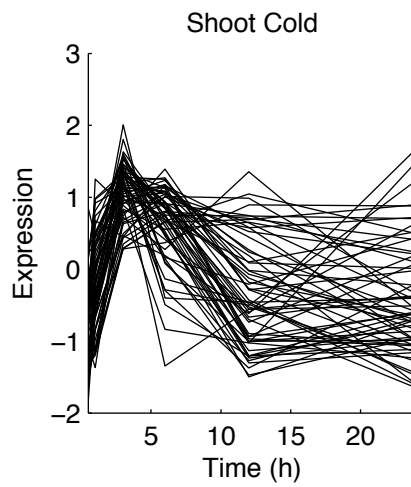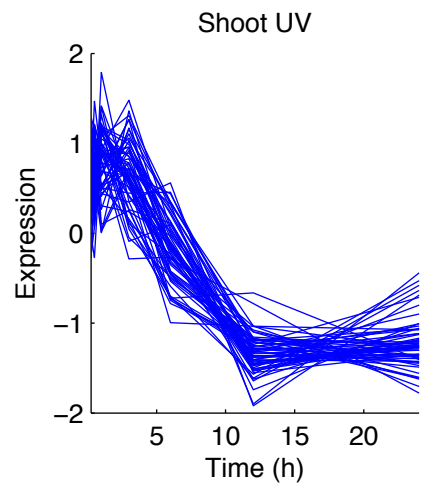

## Module76 – 2,6

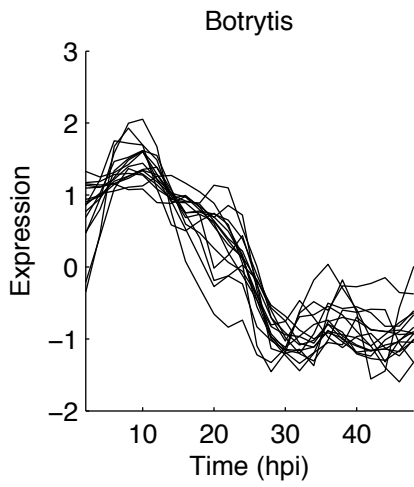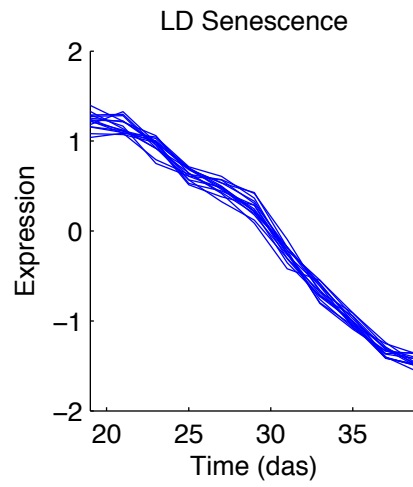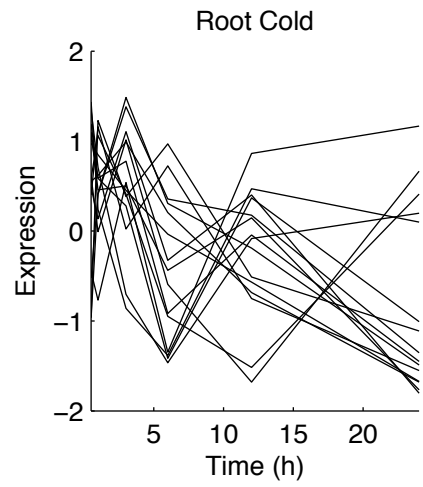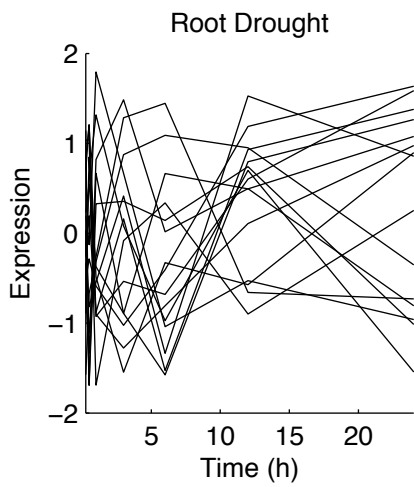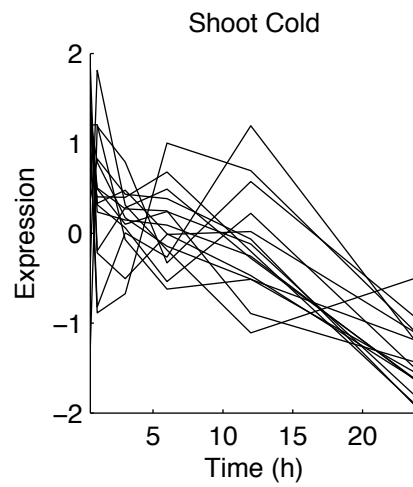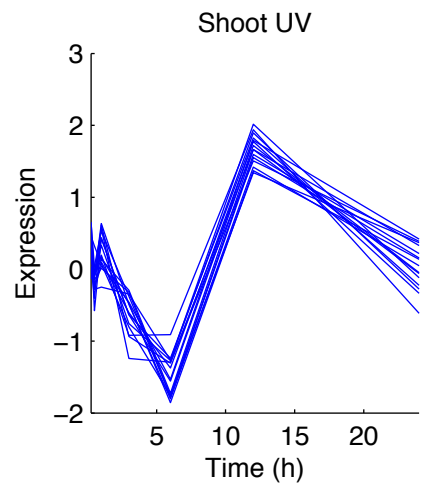

## Module77 – 3,4,5,6

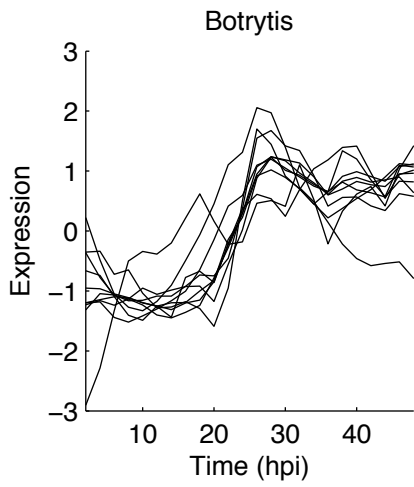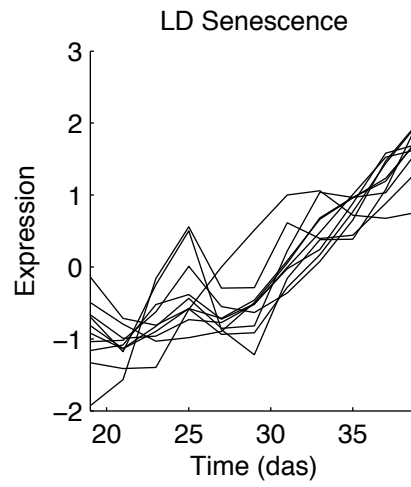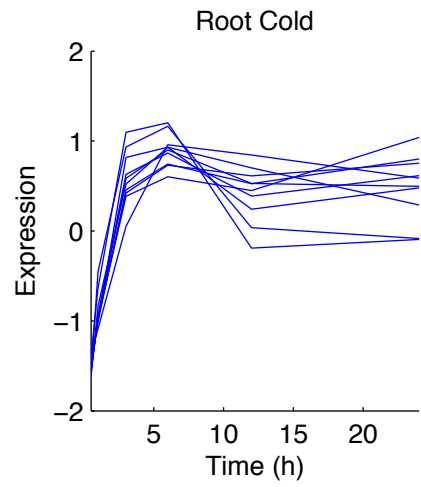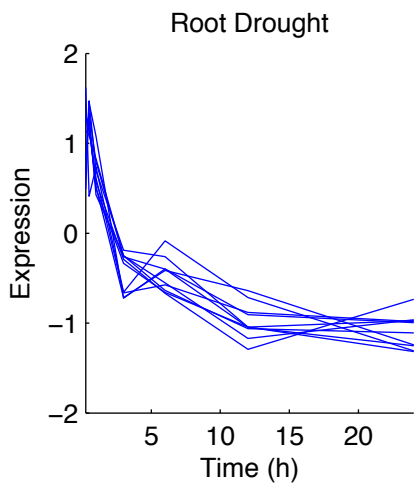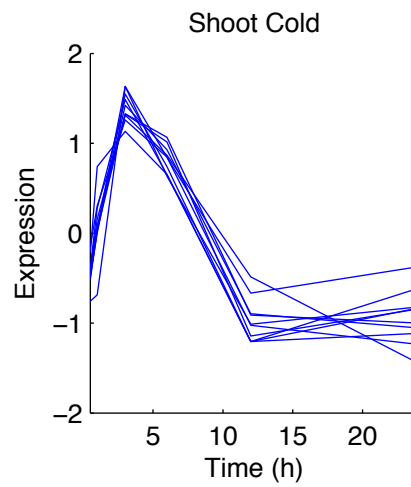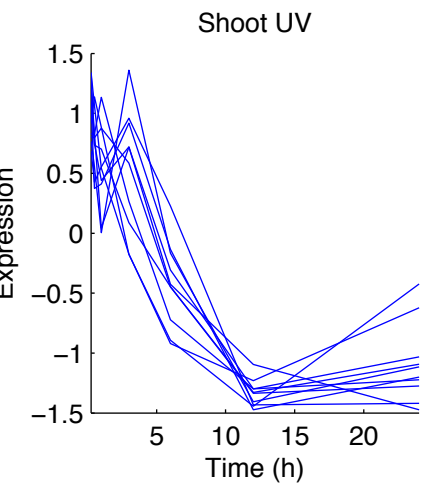

## Module78 – 5,6

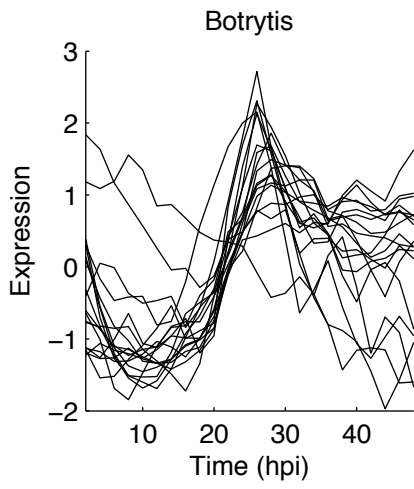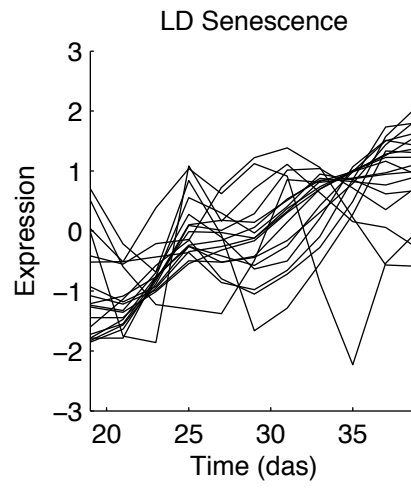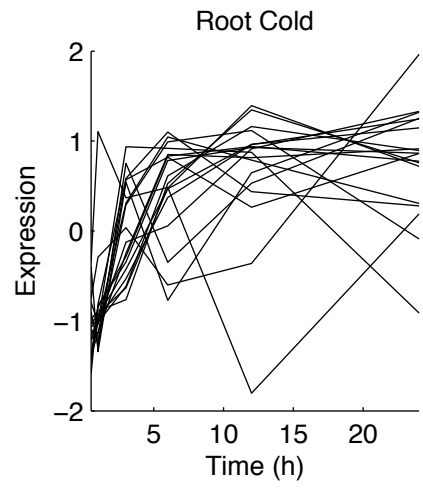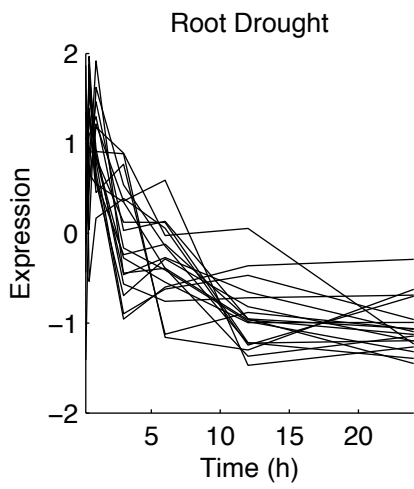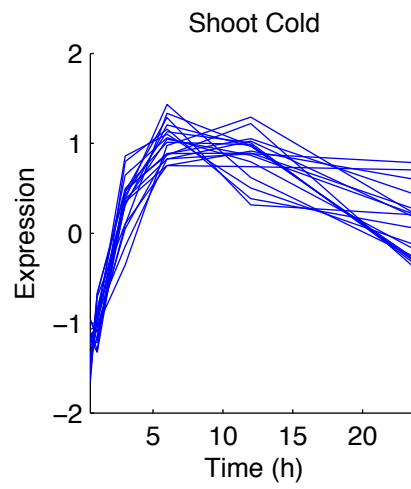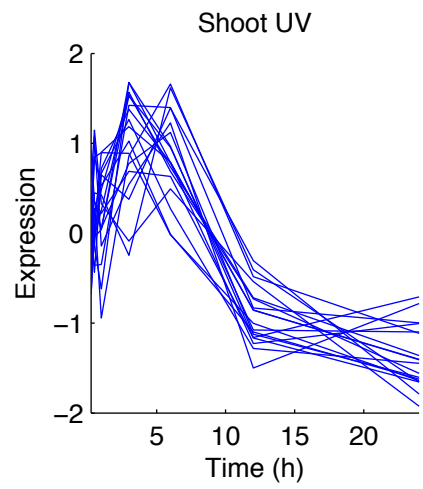

Supplement: supp_btt728_Supp_Data_Set_3_expression_profiles.pdf [file supp_btt728_Supp_Data_Set_3_expression_profiles.pdf]
